# Supplementary material for: Virtual reality-based distraction for intravenous insertion-related distress in children: a study protocol for a randomised controlled trial
Source: PubMed Central journal article supplement — BMJ Open. 2022 Mar 29;12(3):e057892. doi: 10.1136/bmjopen-2021-057892 (PMC8968513; doi:10.1136/bmjopen-2021-057892), 2022-03-29
Supplement: bmjopen-2021-057892.draft_revisions.pdf [file bmjopen-2021-057892.draft_revisions.pdf]

# BMJ Open

BMJ Open is committed to open peer review. As part of this commitment we make the peer review history of every article we publish publicly available.

When an article is published we post the peer reviewers' comments and the authors' responses online. We also post the versions of the paper that were used during peer review. These are the versions that the peer review comments apply to.

The versions of the paper that follow are the versions that were submitted during the peer review process. They are not the versions of record or the final published versions. They should not be cited or distributed as the published version of this manuscript.

BMJ Open is an open access journal and the full, final, typeset and author-corrected version of record of the manuscript is available on our site with no access controls, subscription charges or pay-per-view fees (<http://bmjopen.bmj.com>).

If you have any questions on BMJ Open's open peer review process please email [info.bmjopen@bmj.com](mailto:info.bmjopen@bmj.com)

# BMJ Open

## A randomized controlled trial of virtual reality-based distraction for venipuncture-related distress in children

|                               |                                                                                                                                                                                                                                                                                                                                                                                                                                                                                                                                                                      |
|-------------------------------|----------------------------------------------------------------------------------------------------------------------------------------------------------------------------------------------------------------------------------------------------------------------------------------------------------------------------------------------------------------------------------------------------------------------------------------------------------------------------------------------------------------------------------------------------------------------|
| Journal:                      | <i>BMJ Open</i>                                                                                                                                                                                                                                                                                                                                                                                                                                                                                                                                                      |
| Manuscript ID                 | bmjopen-2021-057892                                                                                                                                                                                                                                                                                                                                                                                                                                                                                                                                                  |
| Article Type:                 | Protocol                                                                                                                                                                                                                                                                                                                                                                                                                                                                                                                                                             |
| Date Submitted by the Author: | 01-Oct-2021                                                                                                                                                                                                                                                                                                                                                                                                                                                                                                                                                          |
| Complete List of Authors:     | Ali, Samina; University of Alberta, Pediatrics<br>Rajagopal, Manasi; University of Alberta, Pediatrics<br>Stinson, Jennifer; Toronto SickKids<br>Ma, Keon; University of Calgary Cumming School of Medicine, Pediatrics<br>Vandermeer, Ben; University of Alberta, Pediatrics<br>Felkar, Bailey; London Health Sciences Centre, Pediatrics<br>Schreiner, Kurt; University of Alberta, Pediatric Parents' Advisory Group<br>Proctor, Amanda; Alberta Health Services<br>Plume, Jennifer; Alberta Health Services<br>Hartling, Lisa; University of Alberta, Pediatrics |
| Keywords:                     | ACCIDENT & EMERGENCY MEDICINE, Pain management <<br>ANAESTHETICS, Paediatric A&E and ambulatory care < PAEDIATRICS,<br>PAIN MANAGEMENT                                                                                                                                                                                                                                                                                                                                                                                                                               |
|                               |                                                                                                                                                                                                                                                                                                                                                                                                                                                                                                                                                                      |

SCHOLARONE™  
Manuscripts

**Title:** A randomized controlled trial of virtual reality-based distraction for venipuncture-related distress in children

**Lay Title:** Virtual Reality Based Distraction for Painful Procedures in Children

**Authorship:** Samina Ali MDCM<sup>1,2,\*</sup>, Manasi Rajagopal MBT<sup>1</sup>, Jennifer Stinson<sup>3</sup>, Keon Ma MD<sup>4</sup>, Ben Vandermeer MSc<sup>5</sup>, Bailey Felkar MS CCLS<sup>6</sup>, Kurt Schreiner MPM<sup>7</sup>, Amanda Proctor<sup>8</sup>, Jennifer Plume BM, MA MTA<sup>9</sup>, Lisa Hartling PhD<sup>1,5</sup>

1 Department of Pediatrics, Faculty of Medicine & Dentistry, University of Alberta, Edmonton, Alberta, Canada

2 Women & Children's Health Research Institute, University of Alberta, Edmonton, Alberta, Canada

3 Child Health Evaluative Sciences, Research Institute, The Hospital for Sick Children and the Lawrence S. Bloomberg Faculty of Nursing, University of Toronto, Toronto, Ontario, Canada

4 Department of Pediatrics, Cumming School of Medicine, University of Calgary, Calgary, Alberta, Canada

5 Alberta Research Centre for Health Evidence, Department of Pediatrics, University of Alberta, Edmonton, Alberta, Canada

6 London Health Sciences Centre Children's Hospital, London, Ontario, Canada

7 Pediatric Parents' Advisory Group, University of Alberta, Edmonton, Canada

8 Stollery Youth Advisory Council and Patient and Family Centred Care, Edmonton, Alberta, Canada

9 Stollery Children's Hospital, Edmonton, Alberta, Canada

\*denotes corresponding author, and contact for public and scientific inquiries

3-583 Edmonton Clinic Health Academy

11405 – 87 Avenue

Edmonton, AB T6G 1C9

Phone: (780) 248-5574

Fax: (888) 775-8876

Email: [sali@ualberta.ca](mailto:sali@ualberta.ca)

Keywords: virtual reality, distress, pain, distraction, pediatrics, intravenous

Trial Protocol Version 15 July 2020

Trial Registration: [clinicaltrials.gov](http://clinicaltrials.gov) NCT04291404

WHO Trial Registration Data Set: See Table 1

Word Count: 3968/ 4000 words

## ABSTRACT

**Introduction.** Intravenous (IV) insertions are among the most commonly performed procedures for children seeking medical care; they are often a painful and stressful experience for both children and their caregivers. Pediatric distress and pain that is inadequately treated may lead to a frightened and uncooperative child, repeated IV attempts and overall frustration with care for both the family and clinical team. We hypothesize that distraction via an immersive virtual reality (VR) experience may reduce the associated distress for children undergoing IV insertions.

### **Methods and analysis.**

This two-armed randomized controlled superiority trial will be conducted in a Canadian pediatric emergency department and will aim to enroll 80 children overall. Children will be randomized to receive either departmental standard of care alone or standard of care plus an immersive VR experience. Children 6 to 17 years of age who are undergoing IV insertion and have topical anesthetic application will be considered for inclusion. Our primary objective is to compare the reduction of distress between the two study arms. The primary outcome will be the child's observed distress score as measured by the Observational Signs of Behavioral Distress-Revised (OSBD-R) tool. Secondary outcomes include the child's pain intensity and fear, parental anxiety, satisfaction with the IV procedure, as well as adverse events. Recruitment launched in September 2020 and is expected to end in January 2022.

**Ethics and dissemination.** This study has been approved by the Health Research Ethics Board (University of Alberta). Informed consent will be obtained from parents or guardians, and assent from children. Study data will be submitted for publication irrespective of results. This study is funded through a Women and Children's Health Research Institute Innovation grant. Purchase of the VR equipment was facilitated through a Stollery Children's Hospital Foundation small equipment grant.

**Trial registration number:** NCT04291404, First registered March 02, 2020

**Words: 300/ 300**

## Article Summary

### Strengths and limitations of this study

1. This randomized controlled trial will assess the effectiveness of immersive virtual reality-based distraction for the reduction of IV insertion-related distress in children.
2. This study measures patient- and family-relevant outcomes including child distress, pain, fear and safety as well as parental anxiety and satisfaction.
3. The study team includes parent and patient partners as co-investigators who will inform study methods and outcomes.
4. The study intervention will be compared to current standard of care; however since there is no consistent standard of care distraction practice, this may create some heterogeneity in the comparison arm of the study.
5. Given the nature of the study intervention, it is not possible to blind patients, parents/caregivers, health care providers, or outcome assessors; the statistician will be blinded to study arms.

## INTRODUCTION

Needle procedures, including venipuncture and intravenous (IV) placement, are described by children as some of the most distressing and painful parts of their healthcare visit. [1-5] Untreated distress and pain can lead to a scared and uncooperative child, a need for repeated IV attempts, reduced efficiency and overall dissatisfaction with care for the patient, family and the health care team. [4, 6, 7] Unpleasant medical encounters in childhood can also shape an individual's perception of healthcare and expectations of pain in adulthood. [4, 8-10] This can result in increased anticipatory anxiety and pain for future medical procedures or an avoidance of healthcare services, altogether. [1] As needle procedures form a routine and necessary part of care in the emergency department (ED) [11], it is an important responsibility of health care providers to adequately manage children's distress and pain, wherever possible.[12]

The recommended and responsible approach to managing children's procedural pain incorporates physical, psychological, and pharmacological components. [13-16] While pharmacological interventions such as topical anesthetic creams are available, their effectiveness is limited to *pain*, as they do not address procedure-related *distress and anxiety*. [13] Distraction therapy is a commonly employed psychological strategy which involves engaging children in a cognitive task or activity in order to divert attention away from nociceptive stimuli. [17] An effective distractor provides sensory stimulation and is highly engaging and age-appropriate in order to fully capture the attention of a child. [11] Previous research has indicated that children who use distraction as an active form of coping experience reduced pain and distress during painful procedures. [11, 18, 19] Traditional distraction techniques such as music, video, stories, imagery and focused breathing have been previously explored for children undergoing unpleasant medical procedures and demonstrated mixed results. [20-25] Our team's recently conducted systematic review of digital technologies has suggested that digital distraction techniques appear promising, but require further study to confirm their utility for painful procedures. [26]

Virtual Reality (VR) technology is rapidly emerging as a novel distraction tool for children undergoing various medical procedures. Unlike traditional distraction techniques, VR uses a combination of visual, auditory and tactile stimuli to create the illusion of being fully immersed in an artificial three-dimensional environment. [27] A Head Mounted Display (or 'VR goggles') delivers the VR video and audio to the child, and also serves to block out the view and sounds of the hospital room. [13] This further removes the patient from the chaos of the treatment room and diverts their attention away from surrounding painful and anxiety-evoking stimuli. To date, VR distraction therapy has shown promise for patients undergoing a range of distressing healthcare procedures, including burn wound cleaning, chest radiography, dental interventions and chemotherapy. [28-33] Therapeutic VR has also led to improved health outcomes for patients with anxiety disorders, phobias, post-traumatic stress disorder, and eating disorders. [34-37]

1  
2  
3 Due to the chaotic, noisy and unpredictable environment of the ED, it is an ideal place to  
4 ‘stress-test’ the ability of VR technology to immerse a child into a distracting and ‘safe’  
5 space while having a medical procedure. Rapid advances in VR technology over the last  
6 few years, and improved cost-effectiveness, offers a unique opportunity to explore its use  
7 in the ED setting. While recently published studies from the ED setting suggest that there  
8 is a positive impact when VR is used for IV insertion in children, [11, 13] recent  
9 systematic reviews have concluded that the current evidence is inconclusive. [38]  
10 Furthermore, outcomes such as distress and adverse effects remain poorly studied. [38]  
11 Many previous trials utilize proprietary software designed specifically for medical use  
12 which may limit widespread accessibility to all centers. This study will evaluate an “off-  
13 the-shelf” device with a range of widely accessible software.  
14  
15  
16

17 This study will evaluate the effectiveness of a VR intervention in reducing IV placement-  
18 related distress for children 6-17 years old presenting to the ED. We hypothesize that the  
19 use of immersive VR distraction will reduce children’s IV related distress when  
20 compared with standard of care, and will improve overall satisfaction with the procedure  
21 for the patient, family and the health care team.  
22  
23

## 24 **METHODS AND ANALYSIS**

25  
26 This study is a two-armed, randomized, controlled superiority trial. The study protocol is  
27 reported using the SPIRIT-PRO reporting guidelines. [39] (See Table 1.)  
28  
29  
30  
31  
32  
33  
34  
35  
36  
37  
38  
39  
40  
41  
42  
43  
44  
45  
46  
47  
48  
49  
50  
51  
52  
53  
54  
55  
56  
57  
58  
59  
60

Table 1. WHO Trial Registration Data Set

| <b>Data Category</b>                          | <b>Information</b>                                                                                                                                                                                                                                                                                                                                                                                                                                                                                                                                                                                                                                                                                                                                                                                                                                                                                                                                                                                                                                                                                                                                                                         |
|-----------------------------------------------|--------------------------------------------------------------------------------------------------------------------------------------------------------------------------------------------------------------------------------------------------------------------------------------------------------------------------------------------------------------------------------------------------------------------------------------------------------------------------------------------------------------------------------------------------------------------------------------------------------------------------------------------------------------------------------------------------------------------------------------------------------------------------------------------------------------------------------------------------------------------------------------------------------------------------------------------------------------------------------------------------------------------------------------------------------------------------------------------------------------------------------------------------------------------------------------------|
| Primary Registry and Trial Identifying Number | clinicaltrials.gov NCT04291404                                                                                                                                                                                                                                                                                                                                                                                                                                                                                                                                                                                                                                                                                                                                                                                                                                                                                                                                                                                                                                                                                                                                                             |
| Date of Registration in Primary Registry      | March 2, 2020                                                                                                                                                                                                                                                                                                                                                                                                                                                                                                                                                                                                                                                                                                                                                                                                                                                                                                                                                                                                                                                                                                                                                                              |
| Secondary Identifying Numbers                 | University of Alberta Research Ethics Board # Pro00095418                                                                                                                                                                                                                                                                                                                                                                                                                                                                                                                                                                                                                                                                                                                                                                                                                                                                                                                                                                                                                                                                                                                                  |
| Source(s) of Monetary or Material Support     | Stollery Children's Hospital Foundation and the Women and Children Health Research Institute Innovation Grant                                                                                                                                                                                                                                                                                                                                                                                                                                                                                                                                                                                                                                                                                                                                                                                                                                                                                                                                                                                                                                                                              |
| Primary Sponsor                               | University of Alberta                                                                                                                                                                                                                                                                                                                                                                                                                                                                                                                                                                                                                                                                                                                                                                                                                                                                                                                                                                                                                                                                                                                                                                      |
| Secondary Sponsor(s)                          | -                                                                                                                                                                                                                                                                                                                                                                                                                                                                                                                                                                                                                                                                                                                                                                                                                                                                                                                                                                                                                                                                                                                                                                                          |
| Contact for Public Queries                    | Dr. Samina Ali 780.248.5575 sali@ualberta.ca                                                                                                                                                                                                                                                                                                                                                                                                                                                                                                                                                                                                                                                                                                                                                                                                                                                                                                                                                                                                                                                                                                                                               |
| Contact for Scientific Queries                | Dr. Samina Ali 780.248.5575 sali@ualberta.ca                                                                                                                                                                                                                                                                                                                                                                                                                                                                                                                                                                                                                                                                                                                                                                                                                                                                                                                                                                                                                                                                                                                                               |
| Public Title                                  | The Virtual Reality Trial                                                                                                                                                                                                                                                                                                                                                                                                                                                                                                                                                                                                                                                                                                                                                                                                                                                                                                                                                                                                                                                                                                                                                                  |
| Scientific Title                              | A randomized controlled trial of virtual reality-based distraction for venipuncture-related distress in children                                                                                                                                                                                                                                                                                                                                                                                                                                                                                                                                                                                                                                                                                                                                                                                                                                                                                                                                                                                                                                                                           |
| Countries of Recruitment                      | Canada                                                                                                                                                                                                                                                                                                                                                                                                                                                                                                                                                                                                                                                                                                                                                                                                                                                                                                                                                                                                                                                                                                                                                                                     |
| Health Condition(s) or Problem(s) Studied     | Venipuncture-related distress                                                                                                                                                                                                                                                                                                                                                                                                                                                                                                                                                                                                                                                                                                                                                                                                                                                                                                                                                                                                                                                                                                                                                              |
| Intervention(s)                               | Addition of distraction via an immersive virtual reality experience to departmental standard of care during the intravenous (IV) insertion procedure                                                                                                                                                                                                                                                                                                                                                                                                                                                                                                                                                                                                                                                                                                                                                                                                                                                                                                                                                                                                                                       |
| Key Inclusion and Exclusion Criteria          | To be eligible to participate in this study, an individual must meet all of the following inclusion criteria: <b>(a)</b> child aged 6–17 years; <b>(b)</b> requires IV placement; and <b>(c)</b> will receive topical anesthetic cream for IV placement. Children meeting any of the following criteria will be excluded: <b>(a)</b> medically unstable; <b>(b)</b> unconscious or not fully alert; <b>(c)</b> visual, auditory cognitive, or mental health issues precluding safe interaction with the VR intervention; <b>(d)</b> conditions that could be exacerbated by the VR environment, such as <i>current</i> symptomatic nausea / vomiting / dizziness/migraine, or a <i>history</i> of psychosis/hallucinations/epilepsy; <b>(e)</b> presence of an infection/injury which could contaminate the VR intervention equipment such as open wounds/ infections of the head and neck area, or suspected/confirmed methicillin-resistant <i>Staphylococcus aureus</i> colonization; <b>(f)</b> screens positive for 'influenza-like illness' as per departmental screening criteria; <b>(g)</b> language barrier precluding the ability to understand and complete study assessments, |



|                          |                                                                                                                                                                                                                                                                                                                                                                                                                                                                                                                                                                                                                                                                                                                                    |
|--------------------------|------------------------------------------------------------------------------------------------------------------------------------------------------------------------------------------------------------------------------------------------------------------------------------------------------------------------------------------------------------------------------------------------------------------------------------------------------------------------------------------------------------------------------------------------------------------------------------------------------------------------------------------------------------------------------------------------------------------------------------|
|                          | in the absence of a native language translator; or <b>(h)</b> previous enrollment in this study.                                                                                                                                                                                                                                                                                                                                                                                                                                                                                                                                                                                                                                   |
| Study Type               | Randomized Controlled Superiority Trial                                                                                                                                                                                                                                                                                                                                                                                                                                                                                                                                                                                                                                                                                            |
| Date of First Enrollment | October 5, 2020                                                                                                                                                                                                                                                                                                                                                                                                                                                                                                                                                                                                                                                                                                                    |
| Sample Size              | 80                                                                                                                                                                                                                                                                                                                                                                                                                                                                                                                                                                                                                                                                                                                                 |
| Recruitment Status       | Actively recruiting                                                                                                                                                                                                                                                                                                                                                                                                                                                                                                                                                                                                                                                                                                                |
| Primary Outcome(s)       | The primary outcome will be the child's total observed distress score during the IV procedure as measured on the Observational Signs of Behavioral Distress-Revised (OSBD-R) tool.                                                                                                                                                                                                                                                                                                                                                                                                                                                                                                                                                 |
| Key Secondary Outcomes   | Secondary outcomes include: <b>(a)</b> the child's self-reported pain score during the IV procedure, using an 11-point 0-10 verbal Numerical Rating Scale (vNRS); <b>(b)</b> the child's self-reported fear score during the IV insertion as measured by the Children's Fear Scale (CFS); <b>(c)</b> parental/caregiver anxiety associated with the procedure, as assessed by the State Trait Anxiety Inventory - State Trait Revised Version (STAI-S, Form Y); <b>(d)</b> satisfaction with the procedure for the child, their parent/caregiver and the nurse inserting the IV, as assessed by a 5-point Likert scale; and <b>(e)</b> the proportion of children who experience adverse events related to the study intervention. |
| Ethics Review            | University of Alberta Research Ethics Board # Pro00095418                                                                                                                                                                                                                                                                                                                                                                                                                                                                                                                                                                                                                                                                          |
| Completion date          | -                                                                                                                                                                                                                                                                                                                                                                                                                                                                                                                                                                                                                                                                                                                                  |
| Summary Results          | -                                                                                                                                                                                                                                                                                                                                                                                                                                                                                                                                                                                                                                                                                                                                  |
| IPD sharing statement    | De-identified data can be shared, on a case-by-case basis, upon discussion with the principal investigator.                                                                                                                                                                                                                                                                                                                                                                                                                                                                                                                                                                                                                        |

### Setting and Study Period

This study will be conducted in the Stollery Children's Hospital (SCH) emergency department in Edmonton, Alberta, Canada. The SCH is a tertiary care hospital whose annual ED census is typically approximately 60,000. The 2020 ED census for the SCH was reduced to 36,899 due to the COVID-19 pandemic. Study recruitment commenced on September 28, 2020. Based on our team's previous experience conducting research in this setting, and considering the ongoing pandemic-related considerations, we anticipate 18 months of recruitment to meet our overall target of 80 patients.

### Eligibility and Exclusion Criteria

Children will be eligible if they are 6 to 17 years, require an IV placement during their ED visit, and have received topical anesthetic cream for their IV placement. This age group was chosen as they are able to reliably self-report pain and are expected to benefit from the virtual reality study intervention, based on prior studies. [40] Due to ethical and pragmatic considerations, we insisted that children must be receiving topical anesthetic cream for IV placement to be eligible for our study, as it is effective and considered standard of care within our hospital. [14] Exclusion criteria are detailed in Table 1.

### Study Intervention and Comparison

The intervention will include the use of an immersive VR application that will engage children for the duration of the IV procedure. The VR intervention will be provided *in addition to* standard of care. The child will wear the VR goggles (Oculus Quest, Oculus, Facebook Technologies, LLC; see Figure 1) and small handheld controllers (optional) can be used to interact with the virtual environment and change settings. The VR goggles will occlude the patient's view of the treatment room, and a pair of noise-cancelling headphones (optional) can be used to block out ambient hospital sounds. Together, this will provide the child with a unique vivid experience of being fully immersed or "present" inside the 3D virtual world. The child will be presented with one of two VR menu options, one for novice users and another for more experienced users. The menus will have pre-selected VR applications that are suitable for use during the IV procedure and will include a combination of interactive games and immersive 3D movies designed specifically for a virtual reality experience (see Figure 2). The choice of applications was based on consultation with the Stollery Children's Hospital Youth Advisory Committee prior to commencing the study. The shortlisted applications were then tested by the principal investigators, other team members, and youth. The research assistant (RA), who will be trained in proper equipment use and trouble-shooting, will help the child with selecting and running the VR game/movie. Based on child and nursing preference, children may either sit up or lie in a supine position for the duration of the procedure. The chosen VR games will not require the child to move their torso or both arms, so as to not interfere with the IV placement. The VR goggles can be removed at any time during the procedure, if the child so desires.

The control group will receive departmental standard of care which will include topical anesthetic cream (mandatory for inclusion in the study) and may include parent/caregiver support, child life services, nursing support, and other support strategies at the discretion of the ED clinical care team and the family. At present, there is no single established

1  
2  
3 distraction therapy or routine that is consistently employed for IV procedures within our  
4 ED. Thus, for pragmatic and ethical considerations, it is felt that the new study VR  
5 intervention should be compared to what is currently already in practice (i.e. standard of  
6 care). Generally, VR technology is not employed by the nursing staff for distracting the  
7 child. However, other forms of technology (i.e., smart phones, tablets) will *not* be  
8 prohibited in the control group if the family chooses to offer them. Use of other devices  
9 and distraction techniques will be documented.  
10  
11

### 12 **Randomization, Allocation Concealment, and Blinding**

13 Randomization will be determined using an online randomization tool hosted on the  
14 REDCap [42] (Research Electronic Data Capture) platform. Following documentation of  
15 informed consent and assent, the RA will obtain the computer-generated randomized  
16 assignment for the child by clicking on the 'Randomize' button within the study-specific  
17 REDCap case report form. Allocation will be concealed from the research staff, ED  
18 clinical staff and the family until this point. However, due to the nature of the  
19 intervention, it is not possible to maintain blinding once the child has been randomized.  
20  
21

22  
23 Children and their parents/caregivers will be informed that the study will evaluate and  
24 compare different forms of distraction, however they will not be made aware of the study  
25 hypothesis for the VR intervention. [7] Furthermore, the statistician will be blinded to  
26 treatment assignment by using randomization codes until data analysis is complete.  
27  
28

### 29 **Recruitment and Data Collection**

30 Participant recruitment will occur in the SCH ED when RAs are on-site, from  
31 approximately 15:00 to 23:00 daily. Based on our team's previous research, this time  
32 frame corresponds with peak ED volume. RAs will screen the electronic ED track board  
33 and communicate with on-site clinical staff to identify potentially eligible patients. The  
34 RA will then further assess eligibility based on the inclusion/exclusion criteria detailed  
35 above. If the child is deemed eligible and the family is willing to participate, the RA will  
36 obtain written informed consent from the parent/ caregiver and assent from the child (See  
37 Appendix 1). One parent/caregiver for each child will be asked to provide consent and  
38 complete all relevant study questionnaires.  
39  
40  
41

42 Prior to the beginning of the IV procedure, the RA will collect baseline information,  
43 including: baseline heart rate, pre-procedure distress, fear, and pain scores from the child,  
44 and pre-procedure anxiety score from the parent/caregiver. The RA will then access the  
45 randomization tool on REDCap to reveal the child's group assignment (VR intervention  
46 or Control).  
47  
48

49 For the VR intervention group, the RA will set up the VR equipment and spend  
50 approximately 5-10 minutes explaining the intervention to the child, including proper use  
51 of the goggles and controller. The RA will then help the child put on and secure the  
52 goggles and headphones, and hand them the controller. They will document the time  
53 required for equipment set up as well as any technical challenges encountered. As per  
54 hospital infection control policy, all VR equipment including the goggles, headphones  
55  
56  
57  
58  
59

1  
2  
3 and controller will be sanitized with disinfectant wipes between participants. A  
4 disposable one-time use cover will be placed on the goggles for each participant. For all  
5 participants (both study arms), the RA will begin video recording the child five minutes  
6 prior to the start of the procedure and continue until 5 minutes post-procedure, to allow  
7 for complete coding of OSBD-R distress scores at a later time.  
8  
9

10  
11  
12 For all participants (both study arms), the staff nurse will insert the IV following  
13 institutional protocol. In keeping with the pragmatic design of the trial, no additional or  
14 study-specific instructions will be provided to either nurses or parents/caregivers  
15 regarding their behaviour during the procedure. For purposes of the study, the start of the  
16 IV insertion procedure will be marked by the cleaning of the IV site by the staff nurse.  
17 The end of the procedure will be defined by the last point of contact by the staff nurse  
18 (i.e., taping cannula in place with or without arm board, wrapping arm with gauze and  
19 taping the gauze in place).  
20  
21

22  
23 During the procedure, the RA will closely monitor the child for any adverse effects. The  
24 child will also be asked to let the team know immediately if they are experiencing any  
25 adverse events or discomfort related to the VR intervention (i.e., dizziness, nausea,  
26 headache). The VR intervention can be discontinued (i.e., the headset can be removed) at  
27 any time, at the discretion of the child or clinical team. If an adverse event were to occur,  
28 the clinical team will be notified, and details will be logged in the REDCap adverse event  
29 log. Additionally, the RA will make a note of any technical failures or issues associated  
30 with the VR equipment during enrollment.  
31  
32

33 Immediately following the first *attempt* at IV placement (regardless of whether it was  
34 successful), the RA will collect post-procedure distress, fear and pain scores from the  
35 child, and post-procedure anxiety score from the parent/caregiver. A few minutes after  
36 completion of the IV placement, satisfaction and acceptability questionnaires will be  
37 completed with the child, parent/caregiver as well as the staff nurse responsible for  
38 inserting the IV. Five minutes after the procedure is completed, the RA will stop the  
39 video recording. The duration of the procedure and total number of IV attempts will be  
40 documented. If the first attempt at placement is unsuccessful, any additional attempts will  
41 occur after all relevant study questionnaires/measurements have been completed.  
42  
43  
44

45 Demographic information, previous history and visit details will also be collected from  
46 the family and the child's medical chart. See Figure 3 for study flow schematic.  
47  
48

### 49 **Outcome Measures**

50 Our primary outcome is **distress**. Our secondary outcomes are **(a)** pain; **(b)** fear; **(c)** the  
51 parental/caregiver anxiety; and **(d)** parental/caregiver and nurse satisfaction with the  
52 procedure in the intervention; and **(e)** safety.  
53

54 Our primary outcome measure will be the child's total distress score during the IV  
55 procedure. Distress associated with the procedure will be assessed using the  
56  
57  
58

1  
2  
3  
4  
5  
6  
7  
8  
9  
10  
11  
12  
13  
14  
15  
16  
17  
18  
19  
20  
21  
22  
23  
24  
25  
26  
27  
28  
29  
30  
31  
32  
33  
34  
35  
36  
37  
38  
39  
40  
41  
42  
43  
44  
45  
46  
47  
48  
49  
50  
51  
52  
53  
54  
55  
56  
57  
58  
59  
60

Observational Scale of Behavioral Distress-Revised (OSBD-R). The OSBD-R is a validated scale that is widely used to measure pain and distress associated with various medical procedures in children. [43-45] The tool assesses eight specific behaviors that are indicative of distress and are weighted according to intensity: information seeking, crying, screaming, restraint, verbal resistance, emotional support, verbal pain, and flailing. Study participants will be videotaped for the duration of the IV procedure as well as for a few minutes before and after; distress will be scored pre-, during, and post-procedure. Two RAs who are trained in the use of the tool will independently observe the videotapes and record the frequency of each of the eight behaviors during continuous 15-second intervals. To ensure high inter-rater reliability, the first 10% of coded videos will be analyzed for inter-rater reliability and RAs will be provided with feedback and re-training, as needed, prior to coding the remaining videos. [7] The mean OSBD-R scores between the two RAs will be used as the final scores. This standardized procedure for OSBD-R has been successfully used in previous research evaluating distraction. [30, 43, 46-49] This scale demonstrates high inter-rater reliability as well as moderate to high correlations with other behavioral measures of distress. [46, 50, 51]

Our principal secondary outcome measure will be the child's pain score during the IV procedure. Pain will be measured using an 11-point verbal Numerical Rating Scale (vNRS) ranging from 0 (no pain) to 10 (worst possible pain). This scale is a commonly used pain measurement tool in pediatric acute pain studies and is validated for use in children 6-17 years of age. [52-55] Pain scores will be self-reported by children both before and immediately following the IV procedure.

Fear will be measured using the Children's Fear Scale (CFS) [5, 56]. This scale depicts five faces representing increasing levels of anxiety, where the left-most face depicts "not scared at all" (score=0) and the right most-face means "most scared possible" (score=4). The CFS is an adaptation of the adult Faces Anxiety Scale [56] and has been validated to measure fear in children undergoing painful medical procedures. [5] Children will be asked to independently rate their fear both before and immediately following the IV procedure.

Parental/Caregiver anxiety will be measured with the State Trait Anxiety Inventory – State Scale Revised Version (STAI-S, Form Y), a validated and commonly used version of STAI, which has improved psychometric properties. [57] Parents/caregivers will be asked to complete the STAI questionnaire both before and immediately following the IV procedure.

Parent/caregiver and nurse satisfaction with the procedure will be measured using a 5-point Likert scale, ranging from 1 "Very dissatisfied" to 5 "Very satisfied". Child satisfaction with the procedure will be measured using a 5-point Likert scale, ranging from 1 "Not at all happy" to 5 "Very happy". Satisfaction scores will be collected immediately following the IV procedure.



Safety of the VR intervention will be determined by assessing the frequency of adverse events post intervention. Specifically, nausea will be self-rated by children immediately following the intervention, using the Baxter Retching Faces (BARF) scale [58]. This scale consists of 6 faces depicting increasing levels of nausea, with assigned scores ranging from 0 to 10. The BARF scale is widely used in medical research and has demonstrated construct, content and convergent validity as a tool to measure nausea in children. The presence of other adverse events (i.e., dizziness) will also be recorded by the RA. Children who are presenting with nausea, vomiting, dizziness or migraines *prior* to enrollment will be excluded from the study to avoid exacerbating these conditions with the use of the VR equipment.

### Sample Size

The sample size for the study is 80 patients overall. Sample size calculations were conducted using a two-tailed, two-sample Mann-Whitney test for the primary outcome of observed behavioral distress based on data from the team's previous trial of digital distraction. To detect a large effect size of 0.6 on the OSBD-R (which was observed in a previous trial), given a Type I error of 0.05 and 80% power, the study will require 35 patients for each of the two study arms. To account for attrition and technical recording failures, the team will plan to over-recruit by 10-15%, for an overall total of 80 patients. This will allow sufficient power to find a difference in the primary outcome, if a difference truly exists.

### Statistical Methods

Statistical analyses will be conducted using statistical software SAS (version 9; SAS Institute, Cary, NC). The significance level will be set at 0.05. Baseline variables will be described using appropriate summary statistics for each group. Imbalances between groups for key baseline variables will indicate the need for further adjusted analyses. For the primary outcome of observed behavioral distress, total OSBD-R scores will be compared between the two groups using independent samples t-tests if they are normally distributed or Mann-Whitney U-tests if they are skewed (the Sidak correction procedure will be used to reduce the probability of a Type I error). Additional model-based analyses (multiple linear regression) will be conducted, as needed, with behavioural distress as the response variable, pre-procedure behavioral distress and group indicators as the explanatory variables along with some possible effect modifiers such as age, sex, and parental/caregiver anxiety levels. Our primary analysis will be based on an intention-to-treat approach where all children who were randomly assigned to a study group will be included in the group to which they were randomized. Where cell sizes are small or data are sparse or missing, proxy information or appropriate imputation methods will be used as needed. Similar approaches will be used to compare the groups with respect to secondary outcomes if appropriate.

### Patient and Public Involvement

The team's parent advisor (KS) has provided ongoing input on the study protocol and design, and has provided valuable feedback on the content, flow and readability of the consent forms and data collection forms. The Stollery Youth Advisory Council, led by team member AP, provided input on the study design, outcomes measures, and types of

virtual reality applications that might be engaging and practical for our study population. AP also reviewed the study protocol and related documents to ensure that the outcomes and tools were patient-relevant and age-appropriate. Following recruitment completion, parent and youth advisors will be further engaged to discuss study results and dissemination plans in the context of patient- and family-centered care.

### **Data Management and Confidentiality**

Data will be entered into a secure online REDCap [42] database hosted by the Women and Children's Health Research Institute (WCHRI). (See Appendix 2 for Case Report Form.) WCHRI's REDCap installation is a validated electronic, web-based data capture system housed in a secure data center at the University of Alberta. Data is entered into REDCap through a web-based interface using 128-bit SSL encryption. Each team member will be granted an individual username/ password and will require additional two factor authentication to log in. All datasets used for statistical analysis will be encrypted and devoid of any patient identifiers. For internal data quality control, a secure master list will be maintained to accurately link study IDs to the patient's medical record.

Selected data elements will be validated electronically throughout the recruitment period and any discrepancies will be assigned to team members for timely resolution. REDCap includes internal quality checks, such as automatic range checks, to identify data that appear inconsistent, incomplete, or inaccurate.

Study data will be entered directly into REDCap in real-time via research iPads or, in some cases (i.e., parent/caregiver indicate a preference to complete paper-based questionnaires), responses may be collected on paper first and then transcribed into REDCap by a trained RA. All paper documents (including study questionnaires, consent/assent forms, and the master list) will be stored in a locked cabinet in a secure location that is only accessible to authorized research staff members. Study videos will be stored electronically in a secure institutional shared drive with restricted access to study staff. Videos will be saved according to their study ID only. The centrally compiled dataset will be stored on a secure server and computers at the University of Alberta. Following completion of the study, all data will continue to be kept in a secure location for five years as dictated by the research ethics board.

### **ETHICS AND DISSEMINATION**

This study has received approval from the Health Research Ethics Board (HREB) at the University of Alberta (HREB identifier: Pro00073476). Any amendments to the study protocol or documents will be submitted for HREB review and will receive approval prior to implementation. Significant protocol amendments will also be reflected online on the [clinicaltrials.gov](http://clinicaltrials.gov) study registration. This study has also received operational approval from the SCH ED.

All children will receive the best possible care for their presenting complaint, regardless of whether they choose to participate. It is possible that patients in the VR intervention group may experience nausea, mild motion sickness or dizziness, however these effects

are rare in children and adolescents, ranging from 0-5%. [59, 60] VR applications have been selected appropriately to minimize these discomforts, and children are monitored closely throughout the study for any adverse effects. Children experiencing nausea, vomiting, dizziness or migraine headaches prior to enrollment will be excluded to avoid potential exacerbation. Study participation is unlikely to prolong the ED length of stay. For infection-control purposes, children screening positive for 'influenza-like illness' (as per ED screening criteria) are excluded to prevent potential contamination of the VR equipment.

Due to resource/logistical constraints, study recruitment will be limited to English-speaking families or those with their own interpreter, at a single recruiting center, and during RA shift hours only. Critically ill children requiring immediate IV insertion will also be excluded to avoid delaying medical care. This may limit the generalizability of the study findings. We will not be controlling for the type of distraction used in the standard of care arm, but we will record what was employed. While this may create some heterogeneity in the comparison arm of the study, it will be a pragmatic reflection of clinical reality. Due to the nature of the intervention, blinding is not possible for the participants or the research personnel, though the statistician will be blind to study group.

The study team plans to publish trial results in a high-impact, peer-reviewed journal and present results at national and international meetings; authorship eligibility will be determined by employing the International Committee of Medical Journal Editors' recommended guidelines. [61] Statistical code and dataset can be made available upon request.

**Competing Interests** None declared.

**Patient Consent** After assessing eligibility based on the outlined inclusion/exclusion criteria, research assistants will obtain consent from the parents/caregivers (and assent from children older than 6 years) prior to enrolling the child in the study. The research assistant will provide both a verbal and written explanation of the study to the family. The family will be given an opportunity to review the consent/assent forms in private and can ask the research assistant any questions they might have prior to signing the consent/assent forms. The family is free to withdraw at any point during the study.

**Acknowledgments** The authors would like to thank the members of the Stollery Youth Advisory Council, who provided valuable input on the study design and gaming/application choices for the virtual reality headsets.

## **FUNDING STATEMENT**

This work is funded by the generosity of the Stollery Children's Hospital Foundation through the Women and Children's Health Research Institute Innovation Grant. Purchase of the virtual reality goggles was facilitated through a generous small equipment grant



1  
2  
3 from the Stollery Children's Hospital Foundation. The funders do not have any role in the  
4 collection, management, analysis, or interpretation of data; writing of the report; or the  
5 decision to submit the report for publication. Dr. Hartling is supported by a Canada  
6 Research Chair in Knowledge Synthesis and Translation and is a Distinguished  
7 Researchers with the Stollery Science Lab supported by the Stollery Children's Hospital  
8 Foundation.  
9  
10  
11  
12  
13  
14  
15  
16  
17  
18  
19  
20  
21  
22  
23  
24  
25  
26  
27  
28  
29  
30  
31  
32  
33  
34  
35  
36  
37  
38  
39  
40  
41  
42  
43  
44  
45  
46  
47  
48  
49  
50  
51  
52  
53  
54  
55  
56  
57  
58  
59  
60

For peer review only

## AUTHOR CONTRIBUTIONS

Dr. Samina Ali (SA) is a pediatric emergency clinician-researcher and Professor of Pediatrics & Emergency Medicine at the University of Alberta. She co-developed and revised the protocol and co-drafted the protocol paper. She chose the previously validated tools for measuring the primary outcomes.

Manasi Rajagopal (MR) is the program lead for the Pediatric Emergency Medicine research program at the University of Alberta and co-principal investigator of this study. She co-developed the study protocol, co-drafted the protocol paper, and will operationalize the study.

Dr. Jennifer Stinson (JS) is the Mary Jo Haddad Nursing Chair in Child Health at the Hospital for Sick Children's Research Institute and a nurse practitioner in the Department of Anesthesia's chronic pain program at the hospital. She assisted with the study design and protocol revision.

Dr. Keon Ma is a pediatric trainee at the University of Calgary, with expertise in OSBD-R coding. He assisted with the study design and protocol revision.

Ben Vandermeer (BV) led the statistical analysis planning and contributed to protocol revision.

Bailey Felkar (BF) is a child life specialist at the Stollery ED with expertise in managing children's pain and distress in the ED setting. She assisted with the study design and protocol revision.

Kurt Schreiner (KS) is a family partner who has provided input into study outcomes to ensure family-relevant outcomes are chosen and will inform our knowledge translation efforts to the public.

Amanda Proctor (AP) is the coordinator of the Stollery Youth Advisory Council. Together with the council, she informed programming choices for the virtual reality devices and has reviewed the protocol and related documents to ensure that the outcomes and tools are patient-relevant and age-appropriate.

Jennifer Plume (JP) is the acting director for Stollery child life services with expertise in managing children's pain and distress in the ED. She has informed study methods and will aid and support the development of our knowledge translation plan.

Dr. Lisa Hartling (LH) is a Professor in the Department of Pediatrics at the University of Alberta and Director of the Alberta Research Centre for Health Evidence (Edmonton, Canada). She assisted with the study design and drafting the protocol, and provides expertise in clinical trial methodology and statistical analyses.

1  
2  
3  
4  
5  
6  
7  
8  
9  
10  
11  
12  
13  
14  
15  
16  
17  
18  
19  
20  
21  
22  
23  
24  
25  
26  
27  
28  
29  
30  
31  
32  
33  
34  
35  
36  
37  
38  
39  
40  
41  
42  
43  
44  
45  
46  
47  
48  
49  
50  
51  
52  
53  
54  
55  
56  
57  
58  
59  
60

All authors have approved this final version of the protocol. None of the authors have financial or other conflicts of interests as they pertain to this study and its involved recruitment sites.

For peer review only

## Figures Legend

**Figure 1.** Child using virtual reality goggles in the emergency department

**Figure 2.** Virtual Reality Game Menus

**Figure 3.** Flow Diagram of Study Procedures

For peer review only

1  
2  
3  
4  
5  
6  
7  
8  
9  
10  
11  
12  
13  
14  
15  
16  
17  
18  
19  
20  
21  
22  
23  
24  
25  
26  
27  
28  
29  
30  
31  
32  
33  
34  
35  
36  
37  
38  
39  
40  
41  
42  
43  
44  
45  
46  
47  
48  
49  
50  
51  
52  
53  
54  
55  
56  
57  
58  
59  
60

For peer review only

## REFERENCES

1. Atzori B, Hoffman HG, Vagnoli L, et al. Virtual Reality Analgesia During Venipuncture in Pediatric Patients With Onco-Hematological Diseases, *Front Psychol* 2018;9 doi:10.3389/fpsyg.2018.02508.
2. Duff AJA. Incorporating psychological approaches into routine paediatric venepuncture, *Archives of Disease in Childhood* 2003;88:931-7 doi:10.1136/adc.88.10.931.
3. Caprilli S, Messeri A. Animal-Assisted Activity at A. Meyer Children's Hospital: A Pilot Study, *Evidence-based Complementary and Alternative Medicine* 2006;3:379 doi:10.1093/ecam/nel029.
4. Sanchez Cristal N, Staab J, Chatham R, et al. Child Life Reduces Distress and Pain and Improves Family Satisfaction in the Pediatric Emergency Department, *Clin Pediatr (Phila)* 2018;57:1567-75 doi:10.1177/0009922818798386.
5. McMurtry CM, Noel M, Chambers CT, et al. Children's fear during procedural pain: Preliminary investigation of the Children's Fear Scale, *Health Psychology* 2011;30:780-8 doi:10.1037/a0024817.
6. McGrath PJ, McAlpine L. Psychologic perspectives on pediatric pain, *The Journal of Pediatrics* 1993;122:S2-8 doi:10.1016/S0022-3476(11)80002-8.
7. Ali S, Sivakumar M, Beran T, et al. Study protocol for a randomised controlled trial of humanoid robot-based distraction for venipuncture pain in children, *BMJ Open* 2018;8:e023366 doi:10.1136/bmjopen-2018-023366.
8. El-Housseiny AA, Alamoudi NM, Farsi NM, et al. Characteristics of dental fear among Arabic-speaking children: a descriptive study, *BMC Oral Health* 2014;14 doi:10.1186/1472-6831-14-118.
9. Fields H. How expectations influence pain, *Pain* 2018;159:S3-S10 doi:10.1097/j.pain.0000000000001272.
10. Noel M, Rabbitts JA, Tai GG, et al. Remembering Pain after Surgery: A Longitudinal Examination of the Role of Pain Catastrophizing in Children's and Parents' Recall, *Pain* 2015;156:800 doi:10.1097/j.pain.000000000000102.
11. Dumoulin S, Bouchard S, Ellis J, et al. A Randomized Controlled Trial on the Use of Virtual Reality for Needle-Related Procedures in Children and Adolescents in the Emergency Department. , *Games for Health Journal* 2019;8:285-93.
12. Jain S, Hegenbarth MA, Humiston SG, et al. Increasing ED use of jet injection of lidocaine for IV-related pain management , *Pediatrics* 2017;139:e20161697.
13. Chan E, Hovenden M, Ramage E, et al. Virtual Reality for Pediatric Needle Procedural Pain: Two Randomized Clinical Trials, *The Journal of Pediatrics* 2019;209:160,167.e4 doi:10.1016/j.jpeds.2019.02.034.
14. Trottier ED, Doré-Bergeron MJ, Chauvin-Kimoff L, et al. Managing pain and distress in children undergoing brief diagnostic and therapeutic procedures. [CPS Position Statement], *Paediatrics & Child Health* 2019;24:509-21.
15. Friedrichsdorf SJ, Eull D, Weidner CA. A Children's Comfort Promise: how can we do everything possible to prevent and treat pain in children using quality improvement strategies? *Pediatric Pain Letter* 2016;18:26-30.
16. Gaskell S. Evidence-based guidelines for the management of invasive and/or distressing procedures with children, *British Journal of Social Psychology* 2019.

17. McCaul KD, Malott JM. Distraction and coping with pain, *Pain* 1985;23:315.
18. Manne SL, Bakeman R, Jacobsen PB, et al. An analysis of a behavioral intervention for children undergoing venipuncture, *Health Psychology* 1994;13:556-66.
19. Vessey JA, Carlson KL, McGill J. Use of distraction with children during an acute pain experience, *Nursing Research* 1994;43:369-72 doi:10.1097/00006199-199411000-00009.
20. Klassen JA, Liang Y, Tjosvold L, et al. Music for Pain and Anxiety in Children Undergoing Medical Procedures: A Systematic Review of Randomized Controlled Trials, *Ambulatory Pediatrics* 2008;8:117-28 doi:10.1016/j.ambp.2007.12.005.
21. Cohen LL, Blount RL, Panopoulos G. Nurse Coaching and Cartoon Distraction: An Effective and Practical Intervention to Reduce Child, Parent, and Nurse Distress During Immunizations, *J Pediatr Psychol* 1997;22:355-70 doi:10.1093/jpepsy/22.3.355.
22. Cassidy K, Reid GJ, McGrath PJ, et al. Watch Needle, Watch TV: Audiovisual Distraction in Preschool Immunization, *Pain Med* 2002;3:108-18 doi:10.1046/j.1526-4637.2002.02027.x.
23. Downey LVA, Zun LS. The Impact of Watching Cartoons for Distraction During Painful Procedures in the Emergency Department, *Pediatric Emergency Care* 2012;28:1033 doi:10.1097/PEC.0b013e31826ca1a.
24. Young T, Griffin E, Phillips E, et al. Music as Distraction in a Pediatric Emergency Department, *Journal of Emergency Nursing* 2010;36:472-3 doi:10.1016/j.jen.2010.05.014.
25. Ha YO, Kim HS. The effects of audiovisual distraction on children's pain during laceration repair, *International Journal of Nursing Practice* 2013;19:20-7 doi:10.1111/ijn.12165.
26. Gates M, Hartling L, Shulhan-Kilroy J, et al. Digital Technology Distraction for Acute Pain in Children: A Meta-analysis, *Pediatrics* 2020;145 doi:10.1542/peds.2019-1139.
27. Ahmadpour N, Randall H, Choksi H, et al. international journal of biochemistry & cell biology, 2019;114:105568.
28. Sikka N, Shu L, Ritchie B, et al. Virtual Reality-Assisted Pain, Anxiety, and Anger Management in the Emergency Department, *Telemedicine and e-Health* 2019.
29. Hoffman HG, Doctor JN, Patterson DR, et al. Use of virtual reality for adjunctive treatment of adolescent burn pain during wound care: A case report, *Pain* 2000;1-2:305-9.
30. Han S, Park J, Choi SI, et al. Effect of Immersive Virtual Reality Education Before Chest Radiography on Anxiety and Distress Among Pediatric Patients: A Randomized Clinical Trial, *JAMA pediatrics* 2019 doi:10.1001/jamapediatrics.2019.3000.
31. Shetty V, Suresh LR, Hegde AM. Effect of Virtual Reality Distraction on Pain and Anxiety During Dental Treatment in 5 to 8 Year Old Children, *Journal of Clinical Pediatric Dentistry* 2019;43:97-102.
32. Furman E, Jasinevicius TR, Bissada NF, et al. Virtual Reality Distraction for Pain Control During Periodontal Scaling and Root Planing Procedures, *The Journal of the American Dental Association* 2009;140:1508-16 doi:10.14219/jada.archive.2009.0102.

- 1  
2  
3  
4  
5  
6  
7  
8  
9  
10  
11  
12  
13  
14  
15  
16  
17  
18  
19  
20  
21  
22  
23  
24  
25  
26  
27  
28  
29  
30  
31  
32  
33  
34  
35  
36  
37  
38  
39  
40  
41  
42  
43  
44  
45  
46  
47  
48  
49  
50  
51  
52  
53  
54  
55  
56  
57  
58  
59  
60
33. Schneider SM, Hood LE. Virtual Reality: A Distraction Intervention for Chemotherapy, *Oncology nursing forum* 2007;34:39-46 doi:10.1188/07.ONF.39-46.
  34. Gerardi M, Rothbaum BO, Ressler K, et al. Virtual reality exposure therapy using a virtual Iraq: Case report, *Journal of Traumatic Stress* 2008;21:209-13 doi:10.1002/jts.20331.
  35. Parsons TD, Rizzo AA. Affective outcomes of virtual reality exposure therapy for anxiety and specific phobias: A meta-analysis, *Journal of Behavior Therapy and Experimental Psychiatry* 2008;39:250-61 doi:10.1016/j.jbtep.2007.07.007.
  36. Botella C, Serrano B, Baños RM, et al. Virtual reality exposure-based therapy for the treatment of post-traumatic stress disorder: a review of its efficacy, the adequacy of the treatment protocol, and its acceptability, *Neuropsychiatr Dis Treat* 2015;11:2533-45 doi:10.2147/NDT.S89542.
  37. Marco JH, Perpiñá C, Botella C. Effectiveness of cognitive behavioral therapy supported by virtual reality in the treatment of body image in eating disorders: One year follow-up, *Psychiatry Research* 2013;209:619-25 doi:10.1016/j.psychres.2013.02.023.
  38. Lambert V, Boylan P, Boran L, et al. Virtual reality distraction for acute pain in children, *The Cochrane database of systematic reviews* 2020;10 doi:10.1002/14651858.CD010686.pub2.
  39. Chan A, Tetzlaff JM, Altman DG, et al. SPIRIT 2013 statement: defining standard protocol items for clinical trials, *Ann Intern Med* 2013;158:200-7 doi:10.7326/0003-4819-158-3-201302050-00583.
  40. Hoffman HG, Rodriguez RA, Gonzalez M, et al. Immersive Virtual Reality as an Adjunctive Non-opioid Analgesic for Pre-dominantly Latin American Children With Large Severe Burn Wounds During Burn Wound Cleaning in the Intensive Care Unit: A Pilot Study, *Frontiers in human neuroscience* 2019;13 doi:10.3389/fnhum.2019.00262.
  41. Gouin S, Gravel J, Amre DK, et al. Evaluation of the Paediatric Canadian Triage and Acuity Scale in a pediatric ED, *Am J Emerg Med* 2005;23:243-7 doi:10.1016/j.ajem.2004.02.046.
  42. Harris PA, Taylor R, Thielke R, et al. Research electronic data capture (REDCap)—A metadata-driven methodology and workflow process for providing translational research informatics support, *Journal of Biomedical Informatics* 2009;42:377-81 doi:10.1016/j.jbi.2008.08.010.
  43. Jay SM, Elliott C. Observation Scale of Behavioral Distress-Revised. Information procedures, definitions of behaviors, OSBD Interval Coding Form. 1986.
  44. Jay SM, Elliott C. Behavioral observation scales for measuring children's distress: The effects of increased methodological rigor, *Journal of Consulting and Clinical Psychology* 1984;52:1106-7 doi:10.1037/0022-006X.52.6.1106.
  45. Tucker CL, Slifer KJ, Dahlquist LM. Reliability and Validity of the Brief Behavioral Distress Scale: A Measure of Children's Distress During Invasive Medical Procedures, *J Pediatr Psychol* 2001;26:513-23 doi:10.1093/jpepsy/26.8.513.
  46. Elliott CH, Jay SM, Woody P. An Observation Scale for Measuring Children's Distress During Medical Procedures, *J Pediatr Psychol* 1987;12:543-51 doi:10.1093/jpepsy/12.4.543.



- 1
- 2
- 3
- 4 47. Megel ME, Houser CW, Gleaves LS. Children's Responses to Immunizations:  
5 Lullabies as a Distraction, *Issues in Comprehensive Pediatric Nursing* 1998;21:129-  
6 45 doi:10.1080/014608698265456.
- 7 48. Noguchi LK. The Effect of Music Versus Nonmusic on Behavioral Signs of Distress  
8 and Self-Report of Pain in Pediatric Injection Patients, *J Music Ther* 2006;43:16-38  
9 doi:10.1093/jmt/43.1.16.
- 10 49. Hartling L, Newton AS, Liang Y, et al. Music to Reduce Pain and Distress in the  
11 Pediatric Emergency Department: A Randomized Clinical Trial, *JAMA Pediatrics*  
12 2013;167:826-35 doi:10.1001/jamapediatrics.2013.200.
- 13 50. Stevenson MD, Bivins CM, O'Brien K, et al. Child Life Intervention During  
14 Angiocatheter Insertion in the Pediatric Emergency Department, *Pediatric*  
15 *Emergency Care* 2005;21:712 doi:10.1097/01.pec.0000186423.84764.5a.
- 16 51. Jay SM, Ozolins M, Elliott CH, et al. Assessment of children's distress during painful  
17 medical procedures, *Health Psychology* 1983;2:133-47 doi:10.1037/0278-  
18 6133.2.2.133.
- 19 52. von Baeyer CL. Children's self-report of pain intensity: what we know, where we are  
20 headed, *Pain research & management* 2009;14:39.
- 21 53. Miró J, Castarlenas E, de la Vega R, et al. Validity of three rating scales for  
22 measuring pain intensity in youths with physical disabilities, *Eur J Pain* 2016;20:130-  
23 7 doi:10.1002/ejp.704.
- 24 54. Castarlenas E, Jensen MP, von Baeyer CL, et al. Psychometric Properties of the  
25 Numerical Rating Scale to Assess Self-Reported Pain Intensity in Children and  
26 Adolescents: A Systematic Review, *Clin J Pain* 2017;33:376-83  
27 doi:10.1097/AJP.0000000000000406.
- 28 55. Castarlenas E, Miró J, Sánchez-Rodríguez E. Is the verbal numerical rating scale a  
29 valid tool for assessing pain intensity in children below 8 years of age? *J Pain*  
30 2013;14:297-304 doi:10.1016/j.jpain.2012.12.004.
- 31 56. McKinley S, Coote K, Stein-Parbury J. Development and testing of a Faces Scale for  
32 the assessment of anxiety in critically ill patients, *Journal of Advanced Nursing*  
33 2003;41:73-9 doi:10.1046/j.1365-2648.2003.02508.x.
- 34 57. Spielberger CD, Sydeman SJ. State-trait anxiety inventory and state-trait anger  
35 expression inventory. Hillsdale, NJ: Lawrence Erlbaum Associates 1994:292-321.
- 36 58. Baxter AL, Watcha MF, Baxter WV, et al. Development and validation of a pictorial  
37 nausea rating scale for children. *Pediatrics* 2011;127:1542.
- 38 59. Gold JI, Mahrer NE. Is Virtual Reality Ready for Prime Time in the Medical Space?  
39 A Randomized Control Trial of Pediatric Virtual Reality for Acute Procedural Pain  
40 Management, *Journal of pediatric psychology* 2018;43 doi:10.1093/jpepsy/jsx129.
- 41 60. Hoffman HG, Patterson DR, Seibel E, et al. Virtual reality pain control during burn  
42 wound debridement in the hydrotank, *The Clinical journal of pain* 2008;24  
43 doi:10.1097/AJP.0b013e318164d2cc.
- 44 61. ICMJE. International Committee of Medical Journal Editors. 2017.  
45 Available: [http://www.icmje.org/recommendations/browse/roles-and-  
46 responsibilities/defining-the-role-of-authors-and-contributors.html](http://www.icmje.org/recommendations/browse/roles-and-responsibilities/defining-the-role-of-authors-and-contributors.html) [Accessed 03 Aug  
47 2021].
- 48
- 49
- 50
- 51
- 52
- 53
- 54
- 55
- 56
- 57
- 58
- 59
- 60

1  
2  
3  
4  
5  
6  
7  
8  
9  
10  
11  
12  
13  
14  
15  
16  
17  
18  
19  
20  
21  
22  
23  
24  
25  
26  
27  
28  
29  
30  
31  
32  
33  
34  
35  
36  
37  
38  
39  
40  
41  
42  
43  
44  
45  
46  
47  
48  
49  
50  
51  
52  
53  
54  
55  
56  
57  
58  
59  
60

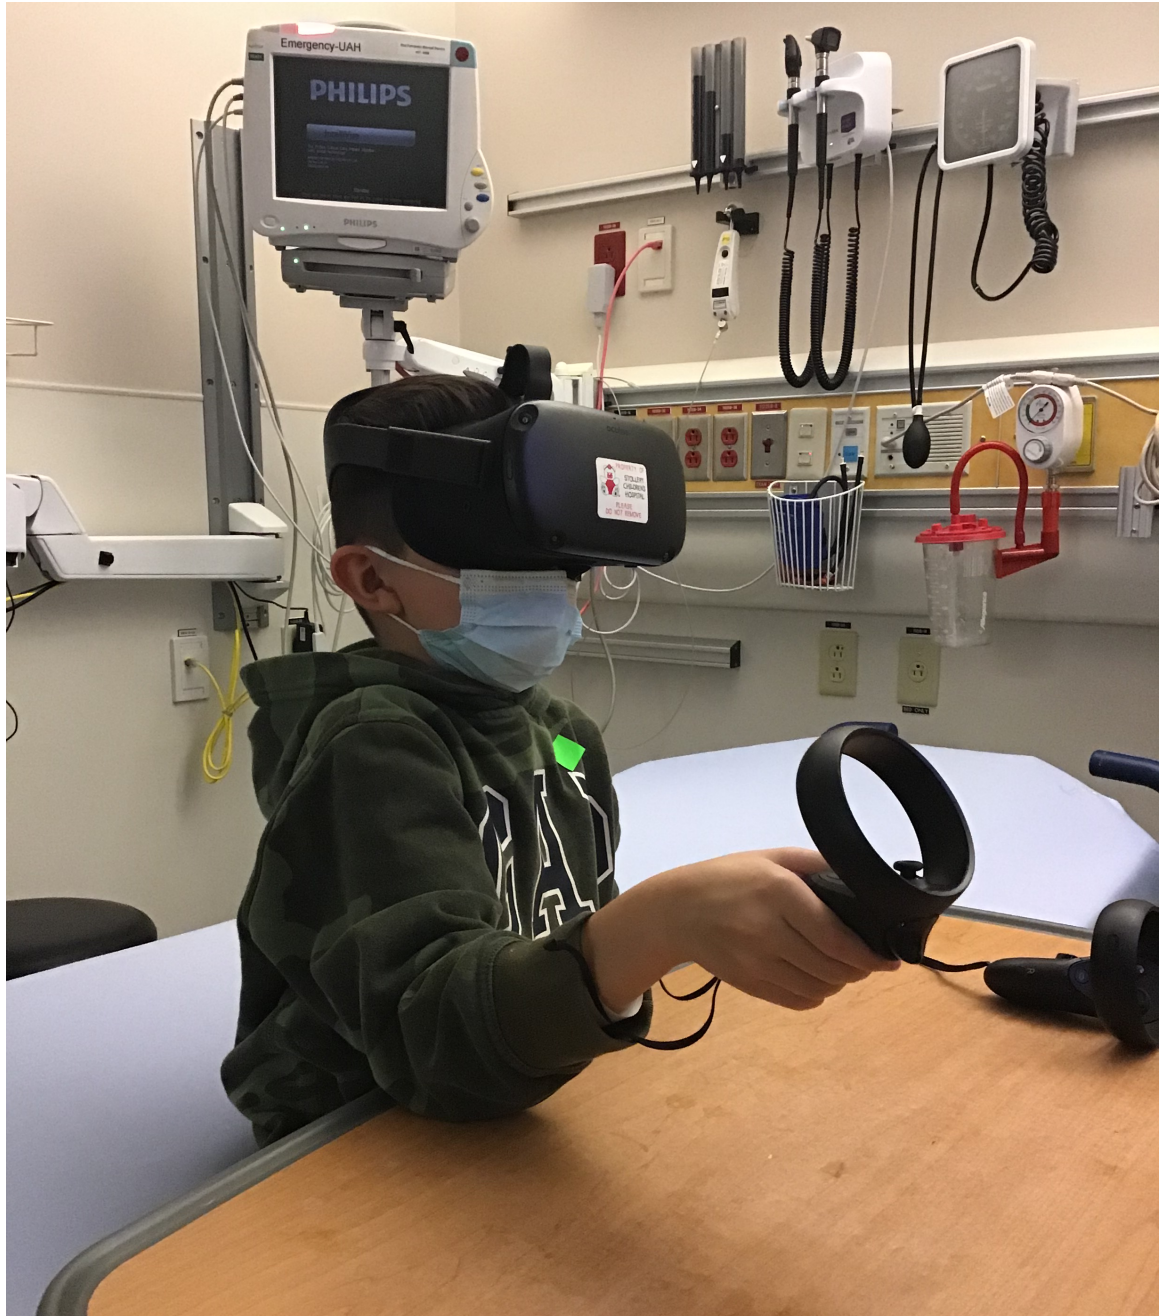

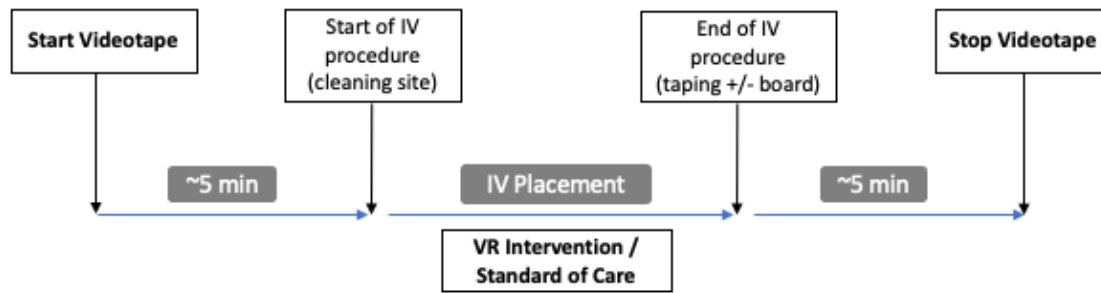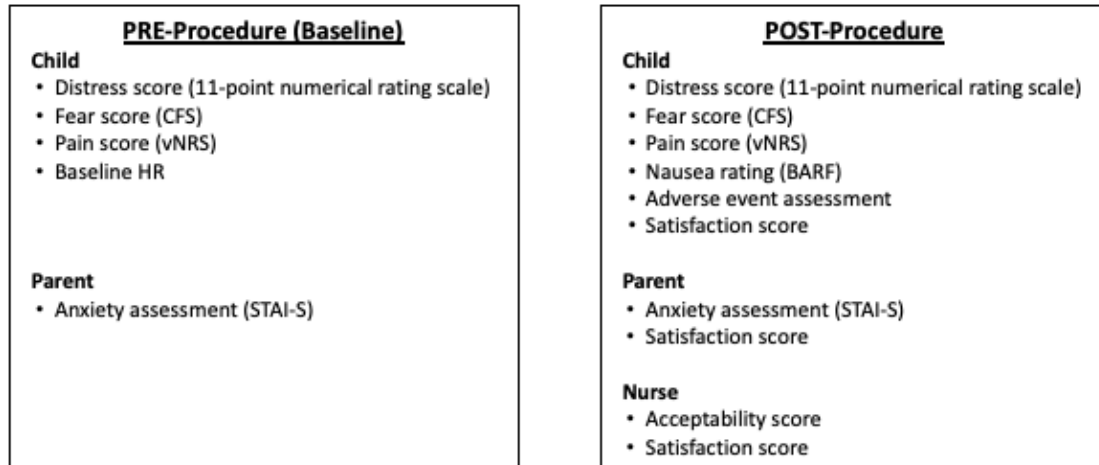

CFS=Children's Fear Scale; vNRS=verbal Numerical Rating Scale; HR=Heart Rate; STAI-S= State Trait Anxiety Inventory – State Scale Revised Version; BARF=Baxter Retching Faces; OSBD-R=Observational Scale of Behavioral Distress-Revised; RA=Research Assistant  
 Note: OSBD-R coding of videos will be done by RAs post visit

Preprint only

**A randomized controlled trial of virtual reality-based distraction for venipuncture-related distress in children:  
The VR Study**

| REB #: Pro00095418 | Screening ID      | Enrolment Date                              |
|--------------------|-------------------|---------------------------------------------|
| PI: Dr. Samina Ali | <b>VR - _____</b> | ____ / ____ / <u>20</u> ____<br>dd mmm yyyy |

## Pre-Screening

|                                              |                                                                                                                                                                                                                                                                                                                                   |
|----------------------------------------------|-----------------------------------------------------------------------------------------------------------------------------------------------------------------------------------------------------------------------------------------------------------------------------------------------------------------------------------|
| Date and Time of Triage                      | ____ / ____ / ____<br>dd mmm yyyy<br>____ : ____<br>(24 hour clock)                                                                                                                                                                                                                                                               |
| Child's Age                                  | _____ years                                                                                                                                                                                                                                                                                                                       |
| Child's Sex                                  | <input type="checkbox"/> Female <input type="checkbox"/> Male                                                                                                                                                                                                                                                                     |
| Was the family approached for this study?    | <input type="checkbox"/> Yes <input type="checkbox"/> No                                                                                                                                                                                                                                                                          |
| <u>If NO</u> , specify reason and STOP HERE. | <input type="checkbox"/> Family refused overall consent to be approached for research<br><input type="checkbox"/> Legal guardian not present<br><input type="checkbox"/> RA busy with another study<br><input type="checkbox"/> Did not meet eligibility criteria, specify _____<br><input type="checkbox"/> Other, Specify _____ |
| <u>If YES</u> , continue to Eligibility.     |                                                                                                                                                                                                                                                                                                                                   |

**A randomized controlled trial of virtual reality-based distraction for venipuncture-related distress in children:  
 The VR Study**

| REB #: Pro00095418 | Screening ID | Enrolment Date                   |
|--------------------|--------------|----------------------------------|
| PI: Dr. Samina Ali | VR - _____   | ___ / ___ / 20___<br>dd mmm yyyy |

**Eligibility**

Was verbal consent for screening obtained from the family?  Yes  No

**Inclusion Criteria**

|                                                           |                              |                             |
|-----------------------------------------------------------|------------------------------|-----------------------------|
| 1. Child aged 6-17 years                                  | <input type="checkbox"/> Yes | <input type="checkbox"/> No |
| 2. Requires IV placement                                  | <input type="checkbox"/> Yes | <input type="checkbox"/> No |
| 3. Will receive topical anesthetic cream for IV placement | <input type="checkbox"/> Yes | <input type="checkbox"/> No |

**Exclusion Criteria**

|                                                                                                                                                                                                                                                                                                                             |                              |                             |
|-----------------------------------------------------------------------------------------------------------------------------------------------------------------------------------------------------------------------------------------------------------------------------------------------------------------------------|------------------------------|-----------------------------|
| 1. Medically unstable (i.e. CTAS 1, requires immediate IV insertion)                                                                                                                                                                                                                                                        | <input type="checkbox"/> Yes | <input type="checkbox"/> No |
| 2. Unconscious or not fully alert                                                                                                                                                                                                                                                                                           | <input type="checkbox"/> Yes | <input type="checkbox"/> No |
| 3. Visual, auditory or cognitive or mental health issues precluding safe interaction with the VR intervention                                                                                                                                                                                                               | <input type="checkbox"/> Yes | <input type="checkbox"/> No |
| 4. Conditions that could be exacerbated by the VR environment (as reported by the family)<br>a. <i>current</i> symptomatic nausea / vomiting / dizziness / migraine<br>b. <i>history</i> of psychosis / hallucinations / epilepsy                                                                                           | <input type="checkbox"/> Yes | <input type="checkbox"/> No |
| 5. Presence of an infection / injury which could contaminate the VR intervention equipment (as determined by the healthcare team) including but not limited to<br>a. open wounds / infections of the head and neck area<br>b. suspected or confirmed methicillin-resistant <i>Staphylococcus aureus</i> (MRSA) colonization | <input type="checkbox"/> Yes | <input type="checkbox"/> No |
| 6. Screens positive for 'influenza-like illness' (ILI) as per the current SCH ED screening criteria                                                                                                                                                                                                                         | <input type="checkbox"/> Yes | <input type="checkbox"/> No |
| 7. Child or Parental language barrier precluding the ability to understand and complete study assessments, in the absence of a native language translator                                                                                                                                                                   | <input type="checkbox"/> Yes | <input type="checkbox"/> No |
| 8. Previous enrollment (of child OR parent) in this study                                                                                                                                                                                                                                                                   | <input type="checkbox"/> Yes | <input type="checkbox"/> No |

**Is the family eligible for the study?**  Yes  No



**A randomized controlled trial of virtual reality-based distraction for venipuncture-related distress in children:  
The VR Study**

| REB #: Pro00095418 | Screening ID | Enrolment Date                      |
|--------------------|--------------|-------------------------------------|
| PI: Dr. Samina Ali | VR - _____   | ____ / ____ / 20____<br>dd mmm yyyy |

## Informed Consent

Has written informed consent been obtained from the **parent/ legal guardian**?  Yes  No

### If NO,

|                               |                                                                                                                                               |
|-------------------------------|-----------------------------------------------------------------------------------------------------------------------------------------------|
| Specify reason and STOP HERE. | <input type="checkbox"/> Declined consent<br><input type="checkbox"/> Declined assent<br><input type="checkbox"/> Other, please specify _____ |
|-------------------------------|-----------------------------------------------------------------------------------------------------------------------------------------------|

### If YES,

|                                                                                                                                                                                                                                                                                                                                                          |                                                                                                                                                                                                                |
|----------------------------------------------------------------------------------------------------------------------------------------------------------------------------------------------------------------------------------------------------------------------------------------------------------------------------------------------------------|----------------------------------------------------------------------------------------------------------------------------------------------------------------------------------------------------------------|
| Specify the date and time of Informed Consent:                                                                                                                                                                                                                                                                                                           | ____ / ____ / ____<br>dd mmm yyyy<br>____ : ____<br>(24 hour clock)                                                                                                                                            |
| Has a copy of the signed informed consent been given to the family?                                                                                                                                                                                                                                                                                      | <input type="checkbox"/> Yes<br><input type="checkbox"/> No; specify: _____                                                                                                                                    |
| Has written assent been obtained from the <b>child</b> ?                                                                                                                                                                                                                                                                                                 | <input type="checkbox"/> Yes<br><input type="checkbox"/> No; specify: _____<br><input type="checkbox"/> No, but verbal assent was obtained and documented<br><input type="checkbox"/> Not required; child < 7y |
| Has a copy of the signed assent been given to the family?                                                                                                                                                                                                                                                                                                | <input type="checkbox"/> Yes<br><input type="checkbox"/> No; specify: _____                                                                                                                                    |
| Has written informed consent been provided by the <b>clinical nurse</b> ?<br><i>Note: Consent only needs to be provided by the clinical nurse once for the entire duration of the study (for all 80-90 participants). If consent has not been previously completed with the clinical nurse, make sure a signed copy is completed before recruitment.</i> | <input type="checkbox"/> Yes<br><input type="checkbox"/> No; specify: _____                                                                                                                                    |
| Clinical Nurse Study ID Number:                                                                                                                                                                                                                                                                                                                          | _____                                                                                                                                                                                                          |

1  
2  
3  
4  
5  
6  
7  
8  
9  
10  
11  
12  
13  
14  
15  
16  
17  
18  
19  
20  
21  
22  
23  
24  
25  
26  
27  
28  
29  
30  
31  
32  
33  
34  
35  
36  
37  
38  
39  
40  
41  
42  
43  
44  
45  
46  
47  
48  
49  
50  
51  
52  
53  
54  
55  
56  
57  
58  
59  
60

**A randomized controlled trial of virtual reality-based distraction for venipuncture-related distress in children:  
The VR Study**

| REB #: Pro00095418 | Screening ID | Enrolment Date                      |
|--------------------|--------------|-------------------------------------|
| PI: Dr. Samina Ali | VR - _____   | ____ / ____ / 20____<br>dd mmm yyyy |

**Randomization**

If the child satisfies the inclusion/ exclusion criteria and written informed consent has been provided, please RANDOMIZE the participant by clicking on the Randomize button below:

|                  |                                                 |
|------------------|-------------------------------------------------|
| <b>Study Arm</b> | <input type="checkbox"/> <b>VR Intervention</b> |
|                  | <input type="checkbox"/> <b>Standard Care</b>   |

For peer review only

**A randomized controlled trial of virtual reality-based distraction for venipuncture-related distress in children:  
The VR Study**

| REB #: Pro00095418 | Screening ID      | Enrolment Date                              |
|--------------------|-------------------|---------------------------------------------|
| PI: Dr. Samina Ali | <b>VR - _____</b> | ____ / ____ / <u>20</u> ____<br>dd mmm yyyy |

## Demographics & History

### Demographics

|                                                               |                                                                                                                                                                                                                                                                                                                               |
|---------------------------------------------------------------|-------------------------------------------------------------------------------------------------------------------------------------------------------------------------------------------------------------------------------------------------------------------------------------------------------------------------------|
| Parent/ Caregiver relationship to child                       | <input type="checkbox"/> Mother<br><input type="checkbox"/> Father<br><input type="checkbox"/> Other; specify: _____                                                                                                                                                                                                          |
| Parent / Caregiver Age                                        | ____ years; or <input type="checkbox"/> Prefer not to answer                                                                                                                                                                                                                                                                  |
| Parent / Caregiver Sex                                        | <input type="checkbox"/> Female<br><input type="checkbox"/> Male                                                                                                                                                                                                                                                              |
| Parent / Caregiver Highest level of Education                 | <input type="checkbox"/> Elementary School<br><input type="checkbox"/> High School or some High School<br><input type="checkbox"/> Diploma/ Certificate<br><input type="checkbox"/> Some Post-Secondary/ University<br><input type="checkbox"/> University/ Professional Degree<br><input type="checkbox"/> Decline to answer |
| First three digits of postal code                             | ____ (1 <sup>st</sup> 3 digits ONLY)                                                                                                                                                                                                                                                                                          |
| Do you identify your child as a member of an ethnic minority? | <input type="checkbox"/> Yes<br><input type="checkbox"/> No                                                                                                                                                                                                                                                                   |

### Medical History

|                                                                                                       |                                                             |
|-------------------------------------------------------------------------------------------------------|-------------------------------------------------------------|
| Was your child born prematurely?                                                                      | <input type="checkbox"/> Yes<br><input type="checkbox"/> No |
| <ul style="list-style-type: none"> <li>If yes, at how many weeks gestation?</li> </ul>                | ____ weeks                                                  |
| Has your child ever been to the Emergency Department before today?                                    | <input type="checkbox"/> Yes<br><input type="checkbox"/> No |
| <ul style="list-style-type: none"> <li>If yes, how many times:</li> </ul>                             | ____ times                                                  |
| Has your child ever been hospitalized?                                                                | <input type="checkbox"/> Yes<br><input type="checkbox"/> No |
| <ul style="list-style-type: none"> <li>If yes, how many times:</li> </ul>                             | ____ times                                                  |
| Has your child ever had a needle poke in their vein to draw blood or put in an intravenous (IV) line? | <input type="checkbox"/> Yes<br><input type="checkbox"/> No |



**A randomized controlled trial of virtual reality-based distraction for venipuncture-related distress in children:  
 The VR Study**

|                           |                     |                                             |
|---------------------------|---------------------|---------------------------------------------|
| <b>REB #: Pro00095418</b> | <b>Screening ID</b> | <b>Enrolment Date</b>                       |
| <b>PI: Dr. Samina Ali</b> | <b>VR - _____</b>   | ____ / ____ / <u>20</u> ____<br>dd mmm yyyy |

|                                                                                                                                                                                                                                                                                                        |                                                                                                                                                                                                     |
|--------------------------------------------------------------------------------------------------------------------------------------------------------------------------------------------------------------------------------------------------------------------------------------------------------|-----------------------------------------------------------------------------------------------------------------------------------------------------------------------------------------------------|
| If yes, how distressed was your child during the procedure? <i>(if more than one occurrence, ask the parent to recall the most recent event)</i> Choose a number between 1 and 5 that best describes your child’s distress where 1 indicates ‘no distress at all’ and 5 is ‘as distressed as possible’ | <input type="checkbox"/> 1 (no distress at all)<br><input type="checkbox"/> 2<br><input type="checkbox"/> 3<br><input type="checkbox"/> 4<br><input type="checkbox"/> 5 (as distressed as possible) |
|--------------------------------------------------------------------------------------------------------------------------------------------------------------------------------------------------------------------------------------------------------------------------------------------------------|-----------------------------------------------------------------------------------------------------------------------------------------------------------------------------------------------------|

**Child Experience with Technology**

|                                                                                             |                                                                                                                                                                                                                                                                                                                                    |
|---------------------------------------------------------------------------------------------|------------------------------------------------------------------------------------------------------------------------------------------------------------------------------------------------------------------------------------------------------------------------------------------------------------------------------------|
| Has your child played with/ used any of the following devices before to <b>play games</b> ? | <input type="checkbox"/> iPad/ iPod/ iPhone / Tablet <i>(to play games)</i><br><input type="checkbox"/> Gaming console<br>(ex. Xbox, Nintendo, PS4, other)<br><input type="checkbox"/> Virtual Reality (VR) device<br>(ex. Oculus Quest/ Rift, Samsung Gear VR, HTC Vive, PlayStation VR, other)<br><input type="checkbox"/> Robot |
|---------------------------------------------------------------------------------------------|------------------------------------------------------------------------------------------------------------------------------------------------------------------------------------------------------------------------------------------------------------------------------------------------------------------------------------|

If yes, how frequently?

| <b>iPad/ iPod/ iPhone / Tablet:</b>                                                                                                                                                                       | <b>Gaming console</b>                                                                                                                                                                                     | <b>VR device</b>                                                                                                                                                                                          | <b>Robot</b>                                                                                                                                                                                              |
|-----------------------------------------------------------------------------------------------------------------------------------------------------------------------------------------------------------|-----------------------------------------------------------------------------------------------------------------------------------------------------------------------------------------------------------|-----------------------------------------------------------------------------------------------------------------------------------------------------------------------------------------------------------|-----------------------------------------------------------------------------------------------------------------------------------------------------------------------------------------------------------|
| <input type="checkbox"/> _____ hours/ week<br><input type="checkbox"/> Less than Once per week<br><input type="checkbox"/> Less than 5 times in total<br><input type="checkbox"/> Other, specify<br>_____ | <input type="checkbox"/> _____ hours/ week<br><input type="checkbox"/> Less than Once per week<br><input type="checkbox"/> Less than 5 times in total<br><input type="checkbox"/> Other, specify<br>_____ | <input type="checkbox"/> _____ hours/ week<br><input type="checkbox"/> Less than Once per week<br><input type="checkbox"/> Less than 5 times in total<br><input type="checkbox"/> Other, specify<br>_____ | <input type="checkbox"/> _____ hours/ week<br><input type="checkbox"/> Less than Once per week<br><input type="checkbox"/> Less than 5 times in total<br><input type="checkbox"/> Other, specify<br>_____ |

A randomized controlled trial of virtual reality-based distraction for venipuncture-related distress in children:  
The VR Study

|                    |              |                                     |
|--------------------|--------------|-------------------------------------|
| REB #: Pro00095418 | Screening ID | Enrolment Date                      |
| PI: Dr. Samina Ali | VR - _____   | ____ / ____ / 20____<br>dd mmm yyyy |

**PRE-Procedure: Child Scores**

**NOTE:** Begin the video recorder (iPad) approximately 5 minutes before the start of the IV procedure, and stop the recording 5 minutes after the end of the procedure.

**Baseline Scores: Child**

|                                                                                                                                                                                                                                                                                                                                                                                                                                                                                                                                                                 |                                                                     |
|-----------------------------------------------------------------------------------------------------------------------------------------------------------------------------------------------------------------------------------------------------------------------------------------------------------------------------------------------------------------------------------------------------------------------------------------------------------------------------------------------------------------------------------------------------------------|---------------------------------------------------------------------|
| Heart Rate (record from Triage)                                                                                                                                                                                                                                                                                                                                                                                                                                                                                                                                 | _____ bpm                                                           |
| Time pre-procedure scores collected                                                                                                                                                                                                                                                                                                                                                                                                                                                                                                                             | ____ / ____ / ____<br>dd mmm yyyy<br>____ : ____<br>(24 hour clock) |
| Pain Score: verbal Numerical Rating Scale (vNRS)<br>"On a scale of 0 to 10, where 0 is no pain and 10 is the worst pain you can imagine, what is your pain level now?"                                                                                                                                                                                                                                                                                                                                                                                          | _____ / 10                                                          |
| Distress Score: Numerical Rating Scale<br>"On a scale of 0 to 10, where 0 is no distress and 10 is the most distress you can imagine having, what is your distress level now?"                                                                                                                                                                                                                                                                                                                                                                                  | _____ / 10                                                          |
| <p>Fear Score: Children's Fear Scale (CFS)<br/>"These faces are showing different amounts of being scared. This face [point to the left-most face] is not scared at all, this face is a little bit more scared [point to the second face from left], a bit more scared [sweep finger along scale], right up to the most scared possible [point to the last face on the right]. Have a look at these faces and choose the one that shows how scared you are right now."</p> 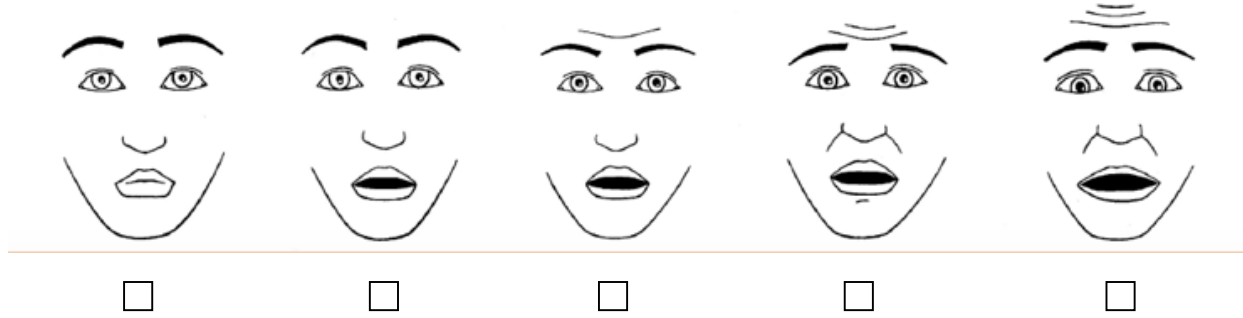 |                                                                     |

A randomized controlled trial of virtual reality-based distraction for venipuncture-related distress in children:  
 The VR Study

| REB #: Pro00095418 | Screening ID | Enrolment Date               |
|--------------------|--------------|------------------------------|
| PI: Dr. Samina Ali | VR - _____   | ___/___/20___<br>dd mmm yyyy |

**PRE-Procedure: Parent / Caregiver STAI Questionnaire**

We would ask that you complete the following questions as they relate to your feelings about your child’s upcoming IV procedure, today. A number of statements which people have used to describe themselves are given below. Read each statement and then circle the appropriate number to indicate how you feel **right now**, that is, **at this moment**. There are no right or wrong answers. Do not spend too much time on any one statement but give the answer which seems to describe your feelings best.

1-----2-----3-----4  
 Not at all      Somewhat      Moderately so      Very much so

1. I feel calm..... 1 2 3 4
2. I feel secure..... 1 2 3 4
3. I am tense..... 1 2 3 4
4. I feel strained..... 1 2 3 4
5. I feel at ease..... 1 2 3 4
6. I feel upset..... 1 2 3 4
7. I am presently worrying over possible misfortunes..... 1 2 3 4
8. I feel satisfied..... 1 2 3 4
9. I feel frightened..... 1 2 3 4
10. I feel comfortable..... 1 2 3 4
11. I feel self-confident..... 1 2 3 4
12. I feel nervous..... 1 2 3 4
13. I am jittery..... 1 2 3 4
14. I feel indecisive..... 1 2 3 4
15. I am relaxed..... 1 2 3 4
16. I feel content..... 1 2 3 4
17. I am worried..... 1 2 3 4
18. I feel confused..... 1 2 3 4
19. I feel steady..... 1 2 3 4
20. I feel pleasant..... 1 2 3 4

**A randomized controlled trial of virtual reality-based distraction for venipuncture-related distress in children:  
The VR Study**

| REB #: Pro00095418 | Screening ID      | Enrolment Date                  |
|--------------------|-------------------|---------------------------------|
| PI: Dr. Samina Ali | <b>VR - _____</b> | ____/____/20____<br>dd mmm yyyy |

### DURING-Procedure

- Start the iPad video recording approximately 5 minutes prior to the start of the procedure.
- For children randomized to the VR group: Immediately after PRE-procedure scores and STAI are completed, research assistant will set up the VR equipment.
- The staff ED nurse will then begin the IV set-up

|                                                                                                                                                                                                                                                                                                   |                                                                                                                                                                                                                                                          |
|---------------------------------------------------------------------------------------------------------------------------------------------------------------------------------------------------------------------------------------------------------------------------------------------------|----------------------------------------------------------------------------------------------------------------------------------------------------------------------------------------------------------------------------------------------------------|
| <b>Start time of IV procedure:</b><br><i>(Defined as the time the staff nurse begins to clean the IV site)</i>                                                                                                                                                                                    | ____/____/____<br>dd mmm yyyy<br>:____<br>(24 hour clock)                                                                                                                                                                                                |
| <b>End time of IV procedure/ attempt:</b><br><i>(Defined as the last point of contact by the staff nurse (ex. taping cannula in place with or without arm board, wrapping arm with gauze and taping the gauze in place))</i>                                                                      | ____/____/____<br>dd mmm yyyy<br>:____<br>(24 hour clock)                                                                                                                                                                                                |
| <b>Position of Child during IV attempt:</b>                                                                                                                                                                                                                                                       | <input type="checkbox"/> Sitting up <input type="checkbox"/> Lying down (supine)                                                                                                                                                                         |
| <b>Location of first IV attempt:</b>                                                                                                                                                                                                                                                              | <input type="checkbox"/> Antecubital Fossa – RIGHT<br><input type="checkbox"/> Antecubital Fossa – RIGHT<br><input type="checkbox"/> Dorsum hand – RIGHT<br><input type="checkbox"/> Dorsum hand – LEFT<br><input type="checkbox"/> Other, specify _____ |
| <b>Was the first IV placement attempt successful?</b>                                                                                                                                                                                                                                             | <input type="checkbox"/> Yes <input type="checkbox"/> No                                                                                                                                                                                                 |
| • If NO, how many attempts, in total, were made for the IV during this ‘episode’?                                                                                                                                                                                                                 | _____ attempts                                                                                                                                                                                                                                           |
| • Was an IV successfully placed during this ‘episode’?                                                                                                                                                                                                                                            | <input type="checkbox"/> Yes <input type="checkbox"/> No                                                                                                                                                                                                 |
| <b>Any adverse events or side effects?</b><br><i>Do not suggest any AEs to the participant; Instead, ask more general questions such as "how are you feeling?" or "are you having any side effects?" or "are you feeling any different than before?", and let the child answer spontaneously.</i> | <input type="checkbox"/> Yes <input type="checkbox"/> No<br><br>If <b>“YES”</b> , complete a separate entry for each AE on the AE Form                                                                                                                   |

A randomized controlled trial of virtual reality-based distraction for venipuncture-related distress in children:  
 The VR Study

| REB #: Pro00095418 | Screening ID | Enrolment Date                   |
|--------------------|--------------|----------------------------------|
| PI: Dr. Samina Ali | VR - _____   | ___ / ___ / 20___<br>dd mmm yyyy |

**IMMEDIATELY POST-Procedure: Child Scores**

**NOTE:** Post-procedure scores/ questionnaires should be collected as soon as possible after the procedure is complete:

**Post-procedure Scores: Child**

|                                                                                                                                                                                                                                                                                                                                                                                                                                                                                                                                                                                                                            |                                                              |
|----------------------------------------------------------------------------------------------------------------------------------------------------------------------------------------------------------------------------------------------------------------------------------------------------------------------------------------------------------------------------------------------------------------------------------------------------------------------------------------------------------------------------------------------------------------------------------------------------------------------------|--------------------------------------------------------------|
| Time post-procedure scores collected                                                                                                                                                                                                                                                                                                                                                                                                                                                                                                                                                                                       | ___ / ___ / ___<br>dd mmm yyyy<br>: _____<br>(24 hour clock) |
| Pain Score: verbal Numerical Rating Scale (vNRS) - Procedure<br>“On a scale of 0 to 10, where 0 is no pain and 10 is the worst pain you can imagine, what was your pain level <u>during the needle / IV poke?</u> ”                                                                                                                                                                                                                                                                                                                                                                                                        | ___ / 10                                                     |
| Distress Score: Numerical Rating Scale - Procedure<br>“On a scale of 0 to 10, where 0 is no distress and 10 is the most distress you can imagine having, what was your distress level <u>during the needle / IV poke?</u> ”                                                                                                                                                                                                                                                                                                                                                                                                | ___ / 10                                                     |
| <p>Fear Score: Children’s Fear Scale (CFS) - Procedure<br/>                     “These faces are showing different amounts of being scared. This face [point to the left-most face] is not scared at all, this face is a little bit more scared [point to the second face from left], a bit more scared [sweep finger along scale], right up to the most scared possible [point to the last face on the right]. Have a look at these faces and choose the one that shows how scared you were <u>during the needle / IV poke.</u>”</p>  |                                                              |
| <p>Nausea Score: Baxter Retching Faces (BARF) Scale - Procedure<br/>                     “Have you thrown up or felt like you were going to throw up before? How did your tummy feel then? We call that feeling of being sick to the stomach nausea. These faces show children who feel no nausea at all, who feel a little bit nauseated, who feel even more nauseated, and these are children who have the most nausea it is possible to feel.” [Point to each face at the appropriate time.] “Which face is more like how you felt <u>during the needle / IV poke?</u>”</p>                                             |                                                              |

A randomized controlled trial of virtual reality-based distraction for venipuncture-related distress in children:  
The VR Study

|                    |              |                              |
|--------------------|--------------|------------------------------|
| REB #: Pro00095418 | Screening ID | Enrolment Date               |
| PI: Dr. Samina Ali | VR - _____   | ___/___/20___<br>dd mmm yyyy |

|                                                                                                                                                       |                                                                                                                                                                                    |
|-------------------------------------------------------------------------------------------------------------------------------------------------------|------------------------------------------------------------------------------------------------------------------------------------------------------------------------------------|
| 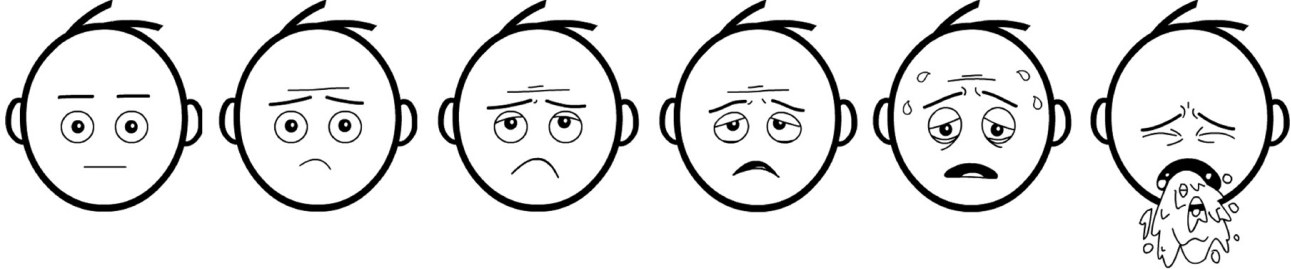                                                                    |                                                                                                                                                                                    |
| <input type="checkbox"/> <input type="checkbox"/> <input type="checkbox"/> <input type="checkbox"/> <input type="checkbox"/> <input type="checkbox"/> |                                                                                                                                                                                    |
| Overall, how happy were you with the IV start today, on a scale of 1 to 5, where 1 means "Not at all happy" and 5 means "Very happy"?                 | <input type="checkbox"/> 1 "Not at all happy"<br><input type="checkbox"/> 2<br><input type="checkbox"/> 3<br><input type="checkbox"/> 4<br><input type="checkbox"/> 5 "Very happy" |
| On a scale of 1 to 5, where 1 means "Not at all happy" and 5 means "Very happy", how happy were you with the pain treatment for your IV start?        | <input type="checkbox"/> 1 "Not at all happy"<br><input type="checkbox"/> 2<br><input type="checkbox"/> 3<br><input type="checkbox"/> 4<br><input type="checkbox"/> 5 "Very happy" |
| Did the [distraction / toys / VR goggles] help you today?                                                                                             | <input type="checkbox"/> Yes, it helped<br><input type="checkbox"/> No, it didn't help<br><input type="checkbox"/> I'm not sure                                                    |
| If you ever had to get an IV or needle poke again, would you want to use the same [distraction / toys / VR goggles] again?                            | <input type="checkbox"/> Yes, I would<br><input type="checkbox"/> No, I wouldn't<br><input type="checkbox"/> I'm not sure                                                          |
| Can you tell me why/ why not?                                                                                                                         |                                                                                                                                                                                    |

As soon as possible after completion of procedure, research assistant to give:  
 1. Post-Procedure Parent STAI and Satisfaction Questionnaire to parent/ caregiver  
 2. Nurse Satisfaction Questionnaire to staff ED nurse

A randomized controlled trial of virtual reality-based distraction for venipuncture-related distress in children:  
 The VR Study

| REB #: Pro00095418 | Screening ID | Enrolment Date                      |
|--------------------|--------------|-------------------------------------|
| PI: Dr. Samina Ali | VR - _____   | ____ / ____ / 20____<br>dd mmm yyyy |

**POST-Procedure: Parent / Caregiver STAI Questionnaire**

We would ask that you complete the following questions as they relate to your feelings about your child’s IV procedure that just happened. A number of statements which people have used to describe themselves are given below. Read each statement and then circle the appropriate number to indicate how you feel **right now**, that is, **at this moment**. There are no right or wrong answers. Do not spend too much time on any one statement but give the answer which seems to describe your feelings best.

1-----2-----3-----4  
 Not at all      Somewhat      Moderately so      Very much so

1. I feel calm..... 1 2 3 4
2. I feel secure..... 1 2 3 4
3. I am tense..... 1 2 3 4
4. I feel strained..... 1 2 3 4
5. I feel at ease..... 1 2 3 4
6. I feel upset..... 1 2 3 4
7. I am presently worrying over possible misfortunes..... 1 2 3 4
8. I feel satisfied..... 1 2 3 4
9. I feel frightened..... 1 2 3 4
10. I feel comfortable..... 1 2 3 4
11. I feel self-confident..... 1 2 3 4
12. I feel nervous..... 1 2 3 4
13. I am jittery..... 1 2 3 4
14. I feel indecisive..... 1 2 3 4
15. I am relaxed..... 1 2 3 4
16. I feel content..... 1 2 3 4
17. I am worried..... 1 2 3 4
18. I feel confused..... 1 2 3 4
19. I feel steady..... 1 2 3 4
20. I feel pleasant..... 1 2 3 4

A randomized controlled trial of virtual reality-based distraction for venipuncture-related distress in children:  
 The VR Study

|                    |              |                                 |
|--------------------|--------------|---------------------------------|
| REB #: Pro00095418 | Screening ID | Enrolment Date                  |
| PI: Dr. Samina Ali | VR - _____   | ____/____/20____<br>dd mmm yyyy |

## POST-Procedure: Caregiver Satisfaction Questionnaire

### 1) Please rate your overall satisfaction with your child's IV start:

|                          |                          |                          |                          |                          |
|--------------------------|--------------------------|--------------------------|--------------------------|--------------------------|
| <i>Very Dissatisfied</i> | <i>Dissatisfied</i>      | <i>Neutral</i>           | <i>Satisfied</i>         | <i>Very Satisfied</i>    |
| <b>1</b>                 | <b>2</b>                 | <b>3</b>                 | <b>4</b>                 | <b>5</b>                 |
| <input type="checkbox"/> |

Please Explain: \_\_\_\_\_  
 \_\_\_\_\_  
 \_\_\_\_\_

### 2) Please rate your satisfaction with the management of your child's pain for their IV start:

|                          |                          |                          |                          |                          |
|--------------------------|--------------------------|--------------------------|--------------------------|--------------------------|
| <i>Very Dissatisfied</i> | <i>Dissatisfied</i>      | <i>Neutral</i>           | <i>Satisfied</i>         | <i>Very Satisfied</i>    |
| <b>1</b>                 | <b>2</b>                 | <b>3</b>                 | <b>4</b>                 | <b>5</b>                 |
| <input type="checkbox"/> |

Please Explain: \_\_\_\_\_  
 \_\_\_\_\_  
 \_\_\_\_\_

### 3) Would you use the same methods to manage your child's pain from needle pokes in the future?

- Yes  
 No

Why / Why not? \_\_\_\_\_  
 \_\_\_\_\_  
 \_\_\_\_\_

**Thank you for your participation in our research study,  
 it is very much appreciated!**



A randomized controlled trial of virtual reality-based distraction for venipuncture-related distress in children:  
 The VR Study

|                    |              |                                 |
|--------------------|--------------|---------------------------------|
| REB #: Pro00095418 | Screening ID | Enrolment Date                  |
| PI: Dr. Samina Ali | VR - _____   | ____/____/20____<br>dd mmm yyyy |

**Nurse Satisfaction Questionnaire (VR Group)**

1) Overall, how easy or difficult was it to perform the IV insertion for this child?

|                          |                          |                          |                          |                          |
|--------------------------|--------------------------|--------------------------|--------------------------|--------------------------|
| <i>Very Easy</i>         | <i>Easy</i>              | <i>Neutral</i>           | <i>Difficult</i>         | <i>Very Difficult</i>    |
| <b>1</b>                 | <b>2</b>                 | <b>3</b>                 | <b>4</b>                 | <b>5</b>                 |
| <input type="checkbox"/> |

2) Please rate your satisfaction with this child's IV start:

|                          |                          |                          |                          |                          |
|--------------------------|--------------------------|--------------------------|--------------------------|--------------------------|
| <i>Very Dissatisfied</i> | <i>Dissatisfied</i>      | <i>Neutral</i>           | <i>Satisfied</i>         | <i>Very Satisfied</i>    |
| <b>1</b>                 | <b>2</b>                 | <b>3</b>                 | <b>4</b>                 | <b>5</b>                 |
| <input type="checkbox"/> |

3) Would you use the same methods (ie. VR device) to manage another child's pain and distress from IV insertion in the future?

Yes  
 No

4) Could you please rate the following on a scale of 1-5, where 1= Not at all and 5=Very much

|                                                                                                    |                          |                          |                          |                          |                          |
|----------------------------------------------------------------------------------------------------|--------------------------|--------------------------|--------------------------|--------------------------|--------------------------|
|                                                                                                    | <b>1</b>                 | <b>2</b>                 | <b>3</b>                 | <b>4</b>                 | <b>5</b>                 |
| Your overall satisfaction with the Virtual Reality (VR) device today                               | <input type="checkbox"/> |
| Your willingness to use the VR device to manage another child's IV pain and distress in the future | <input type="checkbox"/> |
| The degree to which the VR device improved the child's experience                                  | <input type="checkbox"/> |
| The degree to which the VR <b>improved</b> your ability to insert the IV                           | <input type="checkbox"/> |
| The degree to which the VR <b>disrupted</b> your ability to insert the IV                          | <input type="checkbox"/> |

5) Did the VR device that was used during the procedure increase the time required to insert the IV?

Yes (approximately how much time did it increase the procedure by? \_\_\_\_\_ minutes)  
 No

6) Is there anything else that you would like to tell us, today, about your experience inserting an IV for a child using a VR device?

**A randomized controlled trial of virtual reality-based distraction for venipuncture-related distress in children:  
The VR Study**

| REB #: Pro00095418 | Screening ID      | Enrolment Date                              |
|--------------------|-------------------|---------------------------------------------|
| PI: Dr. Samina Ali | <b>VR - _____</b> | ____ / ____ / <u>20</u> ____<br>dd mmm yyyy |

7) How many years of practice do you have as a nurse (all settings)? \_\_\_\_\_  N/A

8) How many years of practice do you have as a nurse in the ED? \_\_\_\_\_  N/A

9) Please indicate the amount of time spent in the pediatric emergency department (PED):

- 0-25% of my time is spent in the pediatric ED
- 26-50% of my time is spent in the pediatric ED
- 51-75% of my time is spent in the pediatric ED
- 76-100% of my time is spent in the pediatric ED

10) Please specify your position if other than attending ED nurse (e.g., IV nurse, attending ED physician, resident, physician or nurse from other service [specify], etc):

\_\_\_\_\_

**Thank You!!**

A randomized controlled trial of virtual reality-based distraction for venipuncture-related distress in children:  
 The VR Study

|                    |              |                                     |
|--------------------|--------------|-------------------------------------|
| REB #: Pro00095418 | Screening ID | Enrolment Date                      |
| PI: Dr. Samina Ali | VR - _____   | ____ / ____ / 20____<br>dd mmm yyyy |

**Nurse Satisfaction Questionnaire (Standard Care Group)**

1) Overall, how easy or difficult was it to perform the IV insertion for this child?

|                          |                          |                          |                          |                          |
|--------------------------|--------------------------|--------------------------|--------------------------|--------------------------|
| <i>Very Easy</i>         | <i>Easy</i>              | <i>Neutral</i>           | <i>Difficult</i>         | <i>Very Difficult</i>    |
| <b>1</b>                 | <b>2</b>                 | <b>3</b>                 | <b>4</b>                 | <b>5</b>                 |
| <input type="checkbox"/> |

2) Please rate your satisfaction with this child's IV start:

|                          |                          |                          |                          |                          |
|--------------------------|--------------------------|--------------------------|--------------------------|--------------------------|
| <i>Very Dissatisfied</i> | <i>Dissatisfied</i>      | <i>Neutral</i>           | <i>Satisfied</i>         | <i>Very Satisfied</i>    |
| <b>1</b>                 | <b>2</b>                 | <b>3</b>                 | <b>4</b>                 | <b>5</b>                 |
| <input type="checkbox"/> |

3) Would you use the same methods (ie. Standard of Care pain management plan) to manage another child's pain and distress from IV insertion in the future?

Yes  
 No

4) Could you please rate the following on a scale of 1-5, where 1= Not at all and 5=Very much

|                                                                                                                     |                          |                          |                          |                          |                          |
|---------------------------------------------------------------------------------------------------------------------|--------------------------|--------------------------|--------------------------|--------------------------|--------------------------|
|                                                                                                                     | <b>1</b>                 | <b>2</b>                 | <b>3</b>                 | <b>4</b>                 | <b>5</b>                 |
| Your overall satisfaction with the pain management plan today                                                       | <input type="checkbox"/> |
| Your willingness to use a similar pain management plan to manage another child's IV pain and distress in the future | <input type="checkbox"/> |
| The degree to which the pain management plan improved the child's experience                                        | <input type="checkbox"/> |
| The degree to which the pain management plan <b>improved</b> your ability to insert the IV                          | <input type="checkbox"/> |
| The degree to which the pain management plan <b>disrupted</b> your ability to insert the IV                         | <input type="checkbox"/> |

5) Did the Standard of Care pain management plan that was used during the procedure increase the time required to insert the IV?

Yes (approximately how much time did it increase the procedure by? \_\_\_\_\_ minutes)  
 No

6) Is there anything else that you would like to tell us, today, about your experience inserting an IV for a child using a Standard of Care pain management plan?

**A randomized controlled trial of virtual reality-based distraction for venipuncture-related distress in children:  
The VR Study**

| REB #: Pro00095418 | Screening ID | Enrolment Date                      |
|--------------------|--------------|-------------------------------------|
| PI: Dr. Samina Ali | VR - _____   | ____ / ____ / 20____<br>dd mmm yyyy |

7) How many years of practice do you have as a nurse (all settings)? \_\_\_\_\_  N/A

8) How many years of practice do you have as a nurse in the ED? \_\_\_\_\_  N/A

9) Please indicate the amount of time spent in the pediatric emergency department (PED):

- 0-25% of my time is spent in the pediatric ED
- 26-50% of my time is spent in the pediatric ED
- 51-75% of my time is spent in the pediatric ED
- 76-100% of my time is spent in the pediatric ED

10) Please specify your position if other than attending ED nurse (e.g., IV nurse, attending ED physician, resident, physician or nurse from other service [specify], etc):

\_\_\_\_\_

**Thank You!!**

A randomized controlled trial of virtual reality-based distraction for venipuncture-related distress in children:  
 The VR Study

| REB #: Pro00095418 | Screening ID | Enrolment Date                      |
|--------------------|--------------|-------------------------------------|
| PI: Dr. Samina Ali | VR - _____   | ____ / ____ / 20____<br>dd mmm yyyy |

## Discharge Information

|                                          |                                                                                                                        |
|------------------------------------------|------------------------------------------------------------------------------------------------------------------------|
| Disposition                              | <input type="checkbox"/> Discharged Home<br><input type="checkbox"/> Admitted<br><input type="checkbox"/> Other, _____ |
| Date & Time of Discharge from the ED     | ____ / ____ / ____<br>dd mmm yyyy<br>____ : ____<br>(24 hour clock)                                                    |
| Length of Stay in ED (calculated field): | ____ hours                                                                                                             |
| Discharge Diagnosis                      |                                                                                                                        |

**A randomized controlled trial of virtual reality-based distraction for venipuncture-related distress in children:  
The VR Study**

| REB #: Pro00095418 | Screening ID      | Enrolment Date                              |
|--------------------|-------------------|---------------------------------------------|
| PI: Dr. Samina Ali | <b>VR - _____</b> | ____ / ____ / <u>20</u> ____<br>dd mmm yyyy |

**RA Satisfaction Questionnaire** (For Standard Care group, answer Q6 ONLY)

1) Could you please rate the following on a scale of 1-5, where 1= Not at all and 5=Very much

|                                                                           | <b>1</b>                 | <b>2</b>                 | <b>3</b>                 | <b>4</b>                 | <b>5</b>                 |
|---------------------------------------------------------------------------|--------------------------|--------------------------|--------------------------|--------------------------|--------------------------|
| Your overall satisfaction with the Virtual Reality (VR) device today      | <input type="checkbox"/> |
| Ease of set-up of the VR device                                           | <input type="checkbox"/> |
| Your satisfaction with the amount of time it took to set up the VR device | <input type="checkbox"/> |
| Your desire to work with the VR device again                              | <input type="checkbox"/> |

2) Approximately how much time was needed to set up the VR device with the child, today?  
(excluding consent and questionnaire time)

\_\_\_\_\_ minutes

3) What components of the VR device did the child use during the IV procedure? (check all that apply)

- VR Goggles / Headset
- Controller
- Headphones

4) Were the VR Goggles / Headset kept on for the entire duration of the procedure?

- Yes
- No

5) What applications / game(s) did the child play during the procedure?

6) What pain management or distraction tools / resources were used during the procedure?

(Check all that apply. If a CLS was involved, ask them to clarify which tools were used.)

- |                                                     |                                                        |
|-----------------------------------------------------|--------------------------------------------------------|
| <input type="checkbox"/> Virtual Reality            | <input type="checkbox"/> Child Life Specialist (CLS)   |
| <input type="checkbox"/> iPad / Tablet / Smartphone | <input type="checkbox"/> Other; specify: _____         |
| <input type="checkbox"/> Toys                       | <input type="checkbox"/> No other techniques were used |
| <input type="checkbox"/> Music                      |                                                        |

7) Did you have any technical or other issues with operating / handing the VR equipment?

- Yes; specify: \_\_\_\_\_
- No

8) Is there anything else that you would like to tell us about your experience with the VR goggles today?

A randomized controlled trial of virtual reality-based distraction for venipuncture-related distress in children:  
 The VR Study

|                    |                         |                                     |
|--------------------|-------------------------|-------------------------------------|
| REB #: Pro00095418 | Screening ID            | Enrolment Date                      |
| PI: Dr. Samina Ali | VR - ____ - ____ - ____ | ____ / ____ / 20____<br>dd mmm yyyy |

**Adverse Events Log**

| To be filled out by Research Assistant |                              |                                             |                                                                                                                                |                                                                                                                          |                                                | To be filled out by Site Investigator                   |                       |                                                                                                   |               |                 |
|----------------------------------------|------------------------------|---------------------------------------------|--------------------------------------------------------------------------------------------------------------------------------|--------------------------------------------------------------------------------------------------------------------------|------------------------------------------------|---------------------------------------------------------|-----------------------|---------------------------------------------------------------------------------------------------|---------------|-----------------|
| No.                                    | Description of Adverse Event | Onset Date & Time<br>(dd/mmm/yyyy<br>HH:MM) | Action Taken<br>1. None<br>2. Medication<br>3. New or Prolonged Hospitalization<br>4. Procedure / Surgery<br>5. Other, specify | Outcome<br>1. Resolved<br>2. Resolved with Sequelae<br>3. Resolving<br>4. Unresolved<br>5. Fatal<br>6. Lost to follow-up | Date & Time Resolved<br>(dd/mmm/yyyy<br>HH:MM) | Intensity grade:<br>1. Mild<br>2. Moderate<br>3. Severe | Expected AE?<br>Y / N | Relationship to Study<br>1. Unrelated<br>2. Unlikely<br>3. Possible<br>4. Probable<br>5. Definite | SAE?<br>Y / N | Site PI Initial |
| 1                                      |                              |                                             |                                                                                                                                |                                                                                                                          |                                                |                                                         |                       |                                                                                                   |               |                 |
| 2                                      |                              |                                             |                                                                                                                                |                                                                                                                          |                                                |                                                         |                       |                                                                                                   |               |                 |
| 3                                      |                              |                                             |                                                                                                                                |                                                                                                                          |                                                |                                                         |                       |                                                                                                   |               |                 |



**A randomized controlled trial of virtual reality-based distraction for venipuncture-related distress in children:  
The VR Study**

|                           |                     |                                               |
|---------------------------|---------------------|-----------------------------------------------|
| <b>REB #: Pro00095418</b> | <b>Screening ID</b> | <b>Enrolment Date</b>                         |
| <b>PI: Dr. Samina Ali</b> | <b>VR - _____</b>   | ____ / ____ / 20____<br>dd      mmm      yyyy |

## Early Withdrawal

**ONLY fill out this form in the event of an early withdrawal**

|                                                                                                                               |                                                                                                                                                                                                                                                                            |
|-------------------------------------------------------------------------------------------------------------------------------|----------------------------------------------------------------------------------------------------------------------------------------------------------------------------------------------------------------------------------------------------------------------------|
| Date of Discontinuation:                                                                                                      | ____ / ____ / ____<br>dd      mmm      yyyy                                                                                                                                                                                                                                |
| Reasons for Discontinuation:<br>(check all that apply)                                                                        | <input type="checkbox"/> Adverse Event / Serious Adverse Event<br><input type="checkbox"/> Death<br><input type="checkbox"/> Withdrawal of Consent / Assent<br><input type="checkbox"/> Protocol Violation, Specify _____<br><input type="checkbox"/> Other, Specify _____ |
| <b><u>If withdrew consent / assent:</u></b><br>1. Permission to use collected data?<br>2. Permission to conduct Chart Review? | <input type="checkbox"/> Yes <input type="checkbox"/> No<br><input type="checkbox"/> Yes <input type="checkbox"/> No                                                                                                                                                       |
| <u>Comments:</u>                                                                                                              |                                                                                                                                                                                                                                                                            |

# Reporting checklist for protocol of a clinical trial.

|                                                         |                     | Reporting Item                                                                                                                                                                                                                                                                           | Page Number   |
|---------------------------------------------------------|---------------------|------------------------------------------------------------------------------------------------------------------------------------------------------------------------------------------------------------------------------------------------------------------------------------------|---------------|
| Title                                                   | <a href="#">#1</a>  | Descriptive title identifying the study design, population, interventions, and, if applicable, trial acronym                                                                                                                                                                             | 1             |
| Trial registration                                      | <a href="#">#2a</a> | Trial identifier and registry name. If not yet registered, name of intended registry                                                                                                                                                                                                     | 1             |
| Trial registration: data set                            | <a href="#">#2b</a> | All items from the World Health Organization Trial Registration Data Set                                                                                                                                                                                                                 | 5-7 (Table 1) |
| Protocol version                                        | <a href="#">#3</a>  | Date and version identifier                                                                                                                                                                                                                                                              | 2             |
| Funding                                                 | <a href="#">#4</a>  | Sources and types of financial, material, and other support                                                                                                                                                                                                                              | 14            |
| Roles and responsibilities: contributorship             | <a href="#">#5a</a> | Names, affiliations, and roles of protocol contributors                                                                                                                                                                                                                                  | 15            |
| Roles and responsibilities: sponsor contact information | <a href="#">#5b</a> | Name and contact information for the trial sponsor                                                                                                                                                                                                                                       | 5             |
| Roles and responsibilities: sponsor and funder          | <a href="#">#5c</a> | Role of study sponsor and funders, if any, in study design; collection, management, analysis, and interpretation of data; writing of the report; and the decision to submit the report for publication, including whether they will have ultimate authority over any of these activities | 14            |
| Roles and responsibilities: committees                  | <a href="#">#5d</a> | Composition, roles, and responsibilities of the coordinating centre, steering committee, endpoint adjudication committee, data management team, and other individuals or                                                                                                                 | N/A           |

|    |                      |                                                 |                                                       |
|----|----------------------|-------------------------------------------------|-------------------------------------------------------|
| 1  |                      | groups overseeing the trial, if applicable (see |                                                       |
| 2  |                      | Item 21a for data monitoring committee)         |                                                       |
| 3  |                      |                                                 |                                                       |
| 4  | Background and       | <a href="#">#6a</a>                             | Description of research question and justification    |
| 5  | rationale            |                                                 | for undertaking the trial, including summary of       |
| 6  |                      |                                                 | relevant studies (published and unpublished)          |
| 7  |                      |                                                 | examining benefits and harms for each                 |
| 8  |                      |                                                 | intervention                                          |
| 9  |                      |                                                 |                                                       |
| 10 |                      |                                                 |                                                       |
| 11 |                      |                                                 |                                                       |
| 12 | Background and       | <a href="#">#6b</a>                             | Explanation for choice of comparators                 |
| 13 | rationale: choice of |                                                 |                                                       |
| 14 | comparators          |                                                 |                                                       |
| 15 |                      |                                                 |                                                       |
| 16 |                      |                                                 |                                                       |
| 17 | Objectives           | <a href="#">#7</a>                              | Specific objectives or hypotheses                     |
| 18 |                      |                                                 |                                                       |
| 19 |                      |                                                 |                                                       |
| 20 | Trial design         | <a href="#">#8</a>                              | Description of trial design including type of trial   |
| 21 |                      |                                                 | (eg, parallel group, crossover, factorial, single     |
| 22 |                      |                                                 | group), allocation ratio, and framework (eg,          |
| 23 |                      |                                                 | superiority, equivalence, non-inferiority,            |
| 24 |                      |                                                 | exploratory)                                          |
| 25 |                      |                                                 |                                                       |
| 26 |                      |                                                 |                                                       |
| 27 |                      |                                                 |                                                       |
| 28 | Study setting        | <a href="#">#9</a>                              | Description of study settings (eg, community          |
| 29 |                      |                                                 | clinic, academic hospital) and list of countries      |
| 30 |                      |                                                 | where data will be collected. Reference to where      |
| 31 |                      |                                                 | list of study sites can be obtained                   |
| 32 |                      |                                                 |                                                       |
| 33 |                      |                                                 |                                                       |
| 34 |                      |                                                 |                                                       |
| 35 | Eligibility criteria | <a href="#">#10</a>                             | Inclusion and exclusion criteria for participants.    |
| 36 |                      |                                                 | If applicable, eligibility criteria for study centres |
| 37 |                      |                                                 | and individuals who will perform the                  |
| 38 |                      |                                                 | interventions (eg, surgeons, psychotherapists)        |
| 39 |                      |                                                 |                                                       |
| 40 |                      |                                                 |                                                       |
| 41 |                      |                                                 |                                                       |
| 42 | Interventions:       | <a href="#">#11a</a>                            | Interventions for each group with sufficient          |
| 43 | description          |                                                 | detail to allow replication, including how and        |
| 44 |                      |                                                 | when they will be administered                        |
| 45 |                      |                                                 |                                                       |
| 46 |                      |                                                 |                                                       |
| 47 | Interventions:       | <a href="#">#11b</a>                            | Criteria for discontinuing or modifying allocated     |
| 48 | modifications        |                                                 | interventions for a given trial participant (eg,      |
| 49 |                      |                                                 | drug dose change in response to harms,                |
| 50 |                      |                                                 | participant request, or improving / worsening         |
| 51 |                      |                                                 | disease)                                              |
| 52 |                      |                                                 |                                                       |
| 53 |                      |                                                 |                                                       |
| 54 |                      |                                                 |                                                       |
| 55 |                      |                                                 |                                                       |
| 56 |                      |                                                 |                                                       |
| 57 |                      |                                                 |                                                       |
| 58 |                      |                                                 |                                                       |
| 59 |                      |                                                 |                                                       |
| 60 |                      |                                                 |                                                       |

|    |                      |                      |                                                    |                  |
|----|----------------------|----------------------|----------------------------------------------------|------------------|
| 1  | Interventions:       | <a href="#">#11c</a> | Strategies to improve adherence to intervention    | 9                |
| 2  | adherence            |                      | protocols, and any procedures for monitoring       |                  |
| 3  |                      |                      | adherence (eg, drug tablet return; laboratory      |                  |
| 4  |                      |                      | tests)                                             |                  |
| 5  |                      |                      |                                                    |                  |
| 6  |                      |                      |                                                    |                  |
| 7  |                      |                      |                                                    |                  |
| 8  | Interventions:       | <a href="#">#11d</a> | Relevant concomitant care and interventions that   | 8                |
| 9  | concomitant care     |                      | are permitted or prohibited during the trial       |                  |
| 10 |                      |                      |                                                    |                  |
| 11 |                      |                      |                                                    |                  |
| 12 | Outcomes             | <a href="#">#12</a>  | Primary, secondary, and other outcomes,            | 10-11            |
| 13 |                      |                      | including the specific measurement variable (eg,   |                  |
| 14 |                      |                      | systolic blood pressure), analysis metric (eg,     |                  |
| 15 |                      |                      | change from baseline, final value, time to event), |                  |
| 16 |                      |                      | method of aggregation (eg, median, proportion),    |                  |
| 17 |                      |                      | and time point for each outcome. Explanation of    |                  |
| 18 |                      |                      | the clinical relevance of chosen efficacy and      |                  |
| 19 |                      |                      | harm outcomes is strongly recommended              |                  |
| 20 |                      |                      |                                                    |                  |
| 21 |                      |                      |                                                    |                  |
| 22 |                      |                      |                                                    |                  |
| 23 |                      |                      |                                                    |                  |
| 24 |                      |                      |                                                    |                  |
| 25 | Participant timeline | <a href="#">#13</a>  | Time schedule of enrolment, interventions          | 8-9 and Figure 3 |
| 26 |                      |                      | (including any run-ins and washouts),              |                  |
| 27 |                      |                      | assessments, and visits for participants. A        |                  |
| 28 |                      |                      | schematic diagram is highly recommended (see       |                  |
| 29 |                      |                      | Figure)                                            |                  |
| 30 |                      |                      |                                                    |                  |
| 31 |                      |                      |                                                    |                  |
| 32 |                      |                      |                                                    |                  |
| 33 | Sample size          | <a href="#">#14</a>  | Estimated number of participants needed to         | 11               |
| 34 |                      |                      | achieve study objectives and how it was            |                  |
| 35 |                      |                      | determined, including clinical and statistical     |                  |
| 36 |                      |                      | assumptions supporting any sample size             |                  |
| 37 |                      |                      | calculations                                       |                  |
| 38 |                      |                      |                                                    |                  |
| 39 |                      |                      |                                                    |                  |
| 40 |                      |                      |                                                    |                  |
| 41 | Recruitment          | <a href="#">#15</a>  | Strategies for achieving adequate participant      | 11               |
| 42 |                      |                      | enrolment to reach target sample size              |                  |
| 43 |                      |                      |                                                    |                  |
| 44 |                      |                      |                                                    |                  |
| 45 | Allocation: sequence | <a href="#">#16a</a> | Method of generating the allocation sequence       | 8                |
| 46 | generation           |                      | (eg, computer-generated random numbers), and       |                  |
| 47 |                      |                      | list of any factors for stratification. To reduce  |                  |
| 48 |                      |                      | predictability of a random sequence, details of    |                  |
| 49 |                      |                      | any planned restriction (eg, blocking) should be   |                  |
| 50 |                      |                      | provided in a separate document that is            |                  |
| 51 |                      |                      | unavailable to those who enrol participants or     |                  |
| 52 |                      |                      | assign interventions                               |                  |
| 53 |                      |                      |                                                    |                  |
| 54 |                      |                      |                                                    |                  |
| 55 |                      |                      |                                                    |                  |
| 56 |                      |                      |                                                    |                  |
| 57 |                      |                      |                                                    |                  |
| 58 |                      |                      |                                                    |                  |
| 59 |                      |                      |                                                    |                  |
| 60 |                      |                      |                                                    |                  |

|    |                       |                      |                                                    |     |
|----|-----------------------|----------------------|----------------------------------------------------|-----|
| 1  | Allocation            | <a href="#">#16b</a> | Mechanism of implementing the allocation           | 8   |
| 2  | concealment           |                      | sequence (eg, central telephone; sequentially      |     |
| 3  | mechanism             |                      | numbered, opaque, sealed envelopes), describing    |     |
| 4  |                       |                      | any steps to conceal the sequence until            |     |
| 5  |                       |                      | interventions are assigned                         |     |
| 6  |                       |                      |                                                    |     |
| 7  |                       |                      |                                                    |     |
| 8  |                       |                      |                                                    |     |
| 9  | Allocation:           | <a href="#">#16c</a> | Who will generate the allocation sequence, who     | 8   |
| 10 | implementation        |                      | will enrol participants, and who will assign       |     |
| 11 |                       |                      | participants to interventions                      |     |
| 12 |                       |                      |                                                    |     |
| 13 |                       |                      |                                                    |     |
| 14 | Blinding (masking)    | <a href="#">#17a</a> | Who will be blinded after assignment to            | 8   |
| 15 |                       |                      | interventions (eg, trial participants, care        |     |
| 16 |                       |                      | providers, outcome assessors, data analysts), and  |     |
| 17 |                       |                      | how                                                |     |
| 18 |                       |                      |                                                    |     |
| 19 |                       |                      |                                                    |     |
| 20 |                       |                      |                                                    |     |
| 21 | Blinding (masking):   | <a href="#">#17b</a> | If blinded, circumstances under which              | N/A |
| 22 | emergency             |                      | unblinding is permissible, and procedure for       |     |
| 23 | unblinding            |                      | revealing a participant's allocated intervention   |     |
| 24 |                       |                      | during the trial                                   |     |
| 25 |                       |                      |                                                    |     |
| 26 |                       |                      |                                                    |     |
| 27 |                       |                      |                                                    |     |
| 28 | Data collection plan  | <a href="#">#18a</a> | Plans for assessment and collection of outcome,    | 8-9 |
| 29 |                       |                      | baseline, and other trial data, including any      |     |
| 30 |                       |                      | related processes to promote data quality (eg,     |     |
| 31 |                       |                      | duplicate measurements, training of assessors)     |     |
| 32 |                       |                      | and a description of study instruments (eg,        |     |
| 33 |                       |                      | questionnaires, laboratory tests) along with their |     |
| 34 |                       |                      | reliability and validity, if known. Reference to   |     |
| 35 |                       |                      | where data collection forms can be found, if not   |     |
| 36 |                       |                      | in the protocol                                    |     |
| 37 |                       |                      |                                                    |     |
| 38 |                       |                      |                                                    |     |
| 39 |                       |                      |                                                    |     |
| 40 |                       |                      |                                                    |     |
| 41 |                       |                      |                                                    |     |
| 42 | Data collection plan: | <a href="#">#18b</a> | Plans to promote participant retention and         | 9   |
| 43 | retention             |                      | complete follow-up, including list of any          |     |
| 44 |                       |                      | outcome data to be collected for participants      |     |
| 45 |                       |                      | who discontinue or deviate from intervention       |     |
| 46 |                       |                      | protocols                                          |     |
| 47 |                       |                      |                                                    |     |
| 48 |                       |                      |                                                    |     |
| 49 |                       |                      |                                                    |     |
| 50 |                       |                      |                                                    |     |
| 51 |                       |                      |                                                    |     |
| 52 |                       |                      |                                                    |     |
| 53 |                       |                      |                                                    |     |
| 54 |                       |                      |                                                    |     |
| 55 |                       |                      |                                                    |     |
| 56 |                       |                      |                                                    |     |
| 57 |                       |                      |                                                    |     |
| 58 |                       |                      |                                                    |     |
| 59 |                       |                      |                                                    |     |
| 60 |                       |                      |                                                    |     |

and Appendix 2 for Case  
Report Form

|    |                                                  |                      |                                                                                                                                                                                                                                                                                                                                       |     |
|----|--------------------------------------------------|----------------------|---------------------------------------------------------------------------------------------------------------------------------------------------------------------------------------------------------------------------------------------------------------------------------------------------------------------------------------|-----|
| 1  | Data management                                  | <a href="#">#19</a>  | Plans for data entry, coding, security, and storage, including any related processes to promote data quality (eg, double data entry; range checks for data values). Reference to where details of data management procedures can be found, if not in the protocol                                                                     | 12  |
| 2  |                                                  |                      |                                                                                                                                                                                                                                                                                                                                       |     |
| 3  |                                                  |                      |                                                                                                                                                                                                                                                                                                                                       |     |
| 4  |                                                  |                      |                                                                                                                                                                                                                                                                                                                                       |     |
| 5  |                                                  |                      |                                                                                                                                                                                                                                                                                                                                       |     |
| 6  |                                                  |                      |                                                                                                                                                                                                                                                                                                                                       |     |
| 7  |                                                  |                      |                                                                                                                                                                                                                                                                                                                                       |     |
| 8  |                                                  |                      |                                                                                                                                                                                                                                                                                                                                       |     |
| 9  |                                                  |                      |                                                                                                                                                                                                                                                                                                                                       |     |
| 10 |                                                  |                      |                                                                                                                                                                                                                                                                                                                                       |     |
| 11 |                                                  |                      |                                                                                                                                                                                                                                                                                                                                       |     |
| 12 |                                                  |                      |                                                                                                                                                                                                                                                                                                                                       |     |
| 13 | Statistics: outcomes                             | <a href="#">#20a</a> | Statistical methods for analysing primary and secondary outcomes. Reference to where other details of the statistical analysis plan can be found, if not in the protocol                                                                                                                                                              | 11  |
| 14 |                                                  |                      |                                                                                                                                                                                                                                                                                                                                       |     |
| 15 |                                                  |                      |                                                                                                                                                                                                                                                                                                                                       |     |
| 16 |                                                  |                      |                                                                                                                                                                                                                                                                                                                                       |     |
| 17 |                                                  |                      |                                                                                                                                                                                                                                                                                                                                       |     |
| 18 |                                                  |                      |                                                                                                                                                                                                                                                                                                                                       |     |
| 19 |                                                  |                      |                                                                                                                                                                                                                                                                                                                                       |     |
| 20 | Statistics: additional analyses                  | <a href="#">#20b</a> | Methods for any additional analyses (eg, subgroup and adjusted analyses)                                                                                                                                                                                                                                                              | 11  |
| 21 |                                                  |                      |                                                                                                                                                                                                                                                                                                                                       |     |
| 22 |                                                  |                      |                                                                                                                                                                                                                                                                                                                                       |     |
| 23 |                                                  |                      |                                                                                                                                                                                                                                                                                                                                       |     |
| 24 | Statistics: analysis population and missing data | <a href="#">#20c</a> | Definition of analysis population relating to protocol non-adherence (eg, as randomised analysis), and any statistical methods to handle missing data (eg, multiple imputation)                                                                                                                                                       | 11  |
| 25 |                                                  |                      |                                                                                                                                                                                                                                                                                                                                       |     |
| 26 |                                                  |                      |                                                                                                                                                                                                                                                                                                                                       |     |
| 27 |                                                  |                      |                                                                                                                                                                                                                                                                                                                                       |     |
| 28 |                                                  |                      |                                                                                                                                                                                                                                                                                                                                       |     |
| 29 |                                                  |                      |                                                                                                                                                                                                                                                                                                                                       |     |
| 30 |                                                  |                      |                                                                                                                                                                                                                                                                                                                                       |     |
| 31 | Data monitoring: formal committee                | <a href="#">#21a</a> | Composition of data monitoring committee (DMC); summary of its role and reporting structure; statement of whether it is independent from the sponsor and competing interests; and reference to where further details about its charter can be found, if not in the protocol. Alternatively, an explanation of why a DMC is not needed | N/A |
| 32 |                                                  |                      |                                                                                                                                                                                                                                                                                                                                       |     |
| 33 |                                                  |                      |                                                                                                                                                                                                                                                                                                                                       |     |
| 34 |                                                  |                      |                                                                                                                                                                                                                                                                                                                                       |     |
| 35 |                                                  |                      |                                                                                                                                                                                                                                                                                                                                       |     |
| 36 |                                                  |                      |                                                                                                                                                                                                                                                                                                                                       |     |
| 37 |                                                  |                      |                                                                                                                                                                                                                                                                                                                                       |     |
| 38 |                                                  |                      |                                                                                                                                                                                                                                                                                                                                       |     |
| 39 |                                                  |                      |                                                                                                                                                                                                                                                                                                                                       |     |
| 40 |                                                  |                      |                                                                                                                                                                                                                                                                                                                                       |     |
| 41 |                                                  |                      |                                                                                                                                                                                                                                                                                                                                       |     |
| 42 |                                                  |                      |                                                                                                                                                                                                                                                                                                                                       |     |
| 43 | Data monitoring: interim analysis                | <a href="#">#21b</a> | Description of any interim analyses and stopping guidelines, including who will have access to these interim results and make the final decision to terminate the trial                                                                                                                                                               | N/A |
| 44 |                                                  |                      |                                                                                                                                                                                                                                                                                                                                       |     |
| 45 |                                                  |                      |                                                                                                                                                                                                                                                                                                                                       |     |
| 46 |                                                  |                      |                                                                                                                                                                                                                                                                                                                                       |     |
| 47 |                                                  |                      |                                                                                                                                                                                                                                                                                                                                       |     |
| 48 |                                                  |                      |                                                                                                                                                                                                                                                                                                                                       |     |
| 49 |                                                  |                      |                                                                                                                                                                                                                                                                                                                                       |     |
| 50 | Harms                                            | <a href="#">#22</a>  | Plans for collecting, assessing, reporting, and managing solicited and spontaneously reported adverse events and other unintended effects of trial interventions or trial conduct                                                                                                                                                     | 11  |
| 51 |                                                  |                      |                                                                                                                                                                                                                                                                                                                                       |     |
| 52 |                                                  |                      |                                                                                                                                                                                                                                                                                                                                       |     |
| 53 |                                                  |                      |                                                                                                                                                                                                                                                                                                                                       |     |
| 54 |                                                  |                      |                                                                                                                                                                                                                                                                                                                                       |     |
| 55 |                                                  |                      |                                                                                                                                                                                                                                                                                                                                       |     |
| 56 |                                                  |                      |                                                                                                                                                                                                                                                                                                                                       |     |
| 57 |                                                  |                      |                                                                                                                                                                                                                                                                                                                                       |     |
| 58 |                                                  |                      |                                                                                                                                                                                                                                                                                                                                       |     |
| 59 |                                                  |                      |                                                                                                                                                                                                                                                                                                                                       |     |
| 60 |                                                  |                      |                                                                                                                                                                                                                                                                                                                                       |     |

|    |                                      |                      |                                                                                                                                                                                                                                    |         |
|----|--------------------------------------|----------------------|------------------------------------------------------------------------------------------------------------------------------------------------------------------------------------------------------------------------------------|---------|
| 1  | Auditing                             | <a href="#">#23</a>  | Frequency and procedures for auditing trial conduct, if any, and whether the process will be independent from investigators and the sponsor                                                                                        | N/A     |
| 2  |                                      |                      |                                                                                                                                                                                                                                    |         |
| 3  |                                      |                      |                                                                                                                                                                                                                                    |         |
| 4  |                                      |                      |                                                                                                                                                                                                                                    |         |
| 5  |                                      |                      |                                                                                                                                                                                                                                    |         |
| 6  | Research ethics approval             | <a href="#">#24</a>  | Plans for seeking research ethics committee / institutional review board (REC / IRB) approval                                                                                                                                      | 14-15   |
| 7  |                                      |                      |                                                                                                                                                                                                                                    |         |
| 8  |                                      |                      |                                                                                                                                                                                                                                    |         |
| 9  |                                      |                      |                                                                                                                                                                                                                                    |         |
| 10 | Protocol amendments                  | <a href="#">#25</a>  | Plans for communicating important protocol modifications (eg, changes to eligibility criteria, outcomes, analyses) to relevant parties (eg, investigators, REC / IRBs, trial participants, trial registries, journals, regulators) | 12-13   |
| 11 |                                      |                      |                                                                                                                                                                                                                                    |         |
| 12 |                                      |                      |                                                                                                                                                                                                                                    |         |
| 13 |                                      |                      |                                                                                                                                                                                                                                    |         |
| 14 |                                      |                      |                                                                                                                                                                                                                                    |         |
| 15 |                                      |                      |                                                                                                                                                                                                                                    |         |
| 16 |                                      |                      |                                                                                                                                                                                                                                    |         |
| 17 |                                      |                      |                                                                                                                                                                                                                                    |         |
| 18 | Consent or assent                    | <a href="#">#26a</a> | Who will obtain informed consent or assent from potential trial participants or authorised surrogates, and how (see Item 32)                                                                                                       | 8       |
| 19 |                                      |                      |                                                                                                                                                                                                                                    |         |
| 20 |                                      |                      |                                                                                                                                                                                                                                    |         |
| 21 |                                      |                      |                                                                                                                                                                                                                                    |         |
| 22 |                                      |                      |                                                                                                                                                                                                                                    |         |
| 23 |                                      |                      |                                                                                                                                                                                                                                    |         |
| 24 | Consent or assent: ancillary studies | <a href="#">#26b</a> | Additional consent provisions for collection and use of participant data and biological specimens in ancillary studies, if applicable                                                                                              | N/A     |
| 25 |                                      |                      |                                                                                                                                                                                                                                    |         |
| 26 |                                      |                      |                                                                                                                                                                                                                                    |         |
| 27 |                                      |                      |                                                                                                                                                                                                                                    |         |
| 28 |                                      |                      |                                                                                                                                                                                                                                    |         |
| 29 | Confidentiality                      | <a href="#">#27</a>  | How personal information about potential and enrolled participants will be collected, shared, and maintained in order to protect confidentiality before, during, and after the trial                                               | 12      |
| 30 |                                      |                      |                                                                                                                                                                                                                                    |         |
| 31 |                                      |                      |                                                                                                                                                                                                                                    |         |
| 32 |                                      |                      |                                                                                                                                                                                                                                    |         |
| 33 |                                      |                      |                                                                                                                                                                                                                                    |         |
| 34 |                                      |                      |                                                                                                                                                                                                                                    |         |
| 35 |                                      |                      |                                                                                                                                                                                                                                    |         |
| 36 | Declaration of interests             | <a href="#">#28</a>  | Financial and other competing interests for principal investigators for the overall trial and each study site                                                                                                                      | 13      |
| 37 |                                      |                      |                                                                                                                                                                                                                                    |         |
| 38 |                                      |                      |                                                                                                                                                                                                                                    |         |
| 39 |                                      |                      |                                                                                                                                                                                                                                    |         |
| 40 |                                      |                      |                                                                                                                                                                                                                                    |         |
| 41 | Data access                          | <a href="#">#29</a>  | Statement of who will have access to the final trial dataset, and disclosure of contractual agreements that limit such access for investigators                                                                                    | Table 1 |
| 42 |                                      |                      |                                                                                                                                                                                                                                    |         |
| 43 |                                      |                      |                                                                                                                                                                                                                                    |         |
| 44 |                                      |                      |                                                                                                                                                                                                                                    |         |
| 45 |                                      |                      |                                                                                                                                                                                                                                    |         |
| 46 |                                      |                      |                                                                                                                                                                                                                                    |         |
| 47 |                                      |                      |                                                                                                                                                                                                                                    |         |
| 48 | Ancillary and post trial care        | <a href="#">#30</a>  | Provisions, if any, for ancillary and post-trial care, and for compensation to those who suffer harm from trial participation                                                                                                      | N/A     |
| 49 |                                      |                      |                                                                                                                                                                                                                                    |         |
| 50 |                                      |                      |                                                                                                                                                                                                                                    |         |
| 51 |                                      |                      |                                                                                                                                                                                                                                    |         |
| 52 |                                      |                      |                                                                                                                                                                                                                                    |         |
| 53 |                                      |                      |                                                                                                                                                                                                                                    |         |
| 54 | Dissemination policy: trial results  | <a href="#">#31a</a> | Plans for investigators and sponsor to communicate trial results to participants, healthcare professionals, the public, and other relevant groups (eg, via publication, reporting in                                               | 13      |
| 55 |                                      |                      |                                                                                                                                                                                                                                    |         |
| 56 |                                      |                      |                                                                                                                                                                                                                                    |         |
| 57 |                                      |                      |                                                                                                                                                                                                                                    |         |
| 58 |                                      |                      |                                                                                                                                                                                                                                    |         |
| 59 |                                      |                      |                                                                                                                                                                                                                                    |         |



1 results databases, or other data sharing  
 2 arrangements), including any publication  
 3 restrictions  
 4

|    |                      |                      |                                                  |            |
|----|----------------------|----------------------|--------------------------------------------------|------------|
| 5  | 3Dissemination       | <a href="#">#31b</a> | Authorship eligibility guidelines and any        | 15-16      |
| 6  | policy: authorship   |                      | intended use of professional writers             |            |
| 7  |                      |                      |                                                  |            |
| 8  |                      |                      |                                                  |            |
| 9  | Dissemination        | <a href="#">#31c</a> | Plans, if any, for granting public access to the | Table 1    |
| 10 | policy: reproducible |                      | full protocol, participant-level dataset, and    |            |
| 11 | research             |                      | statistical code                                 |            |
| 12 |                      |                      |                                                  |            |
| 13 |                      |                      |                                                  |            |
| 14 | Informed consent     | <a href="#">#32</a>  | Model consent form and other related             | Appendix 1 |
| 15 | materials            |                      | documentation given to participants and          |            |
| 16 |                      |                      | authorised surrogates                            |            |
| 17 |                      |                      |                                                  |            |
| 18 |                      |                      |                                                  |            |
| 19 |                      |                      |                                                  |            |
| 20 | Biological           | <a href="#">#33</a>  | Plans for collection, laboratory evaluation, and | N/A        |
| 21 | specimens            |                      | storage of biological specimens for genetic or   |            |
| 22 |                      |                      | molecular analysis in the current trial and for  |            |
| 23 |                      |                      | future use in ancillary studies, if applicable   |            |
| 24 |                      |                      |                                                  |            |
| 25 |                      |                      |                                                  |            |
| 26 |                      |                      |                                                  |            |

27 The SPIRIT checklist is distributed under the terms of the Creative Commons Attribution License CC-BY-ND  
 28 3.0. This checklist can be completed online using <https://www.goodreports.org/>, a tool made by the [EQUATOR](#)  
 29 [Network](#) in collaboration with [Penelope.ai](#)  
 30

# BMJ Open

## A study protocol for a randomized controlled trial of virtual reality-based distraction for intravenous insertion-related distress in children

|                                 |                                                                                                                                                                                                                                                                                                                                                                                                                                                                                                                                                                      |
|---------------------------------|----------------------------------------------------------------------------------------------------------------------------------------------------------------------------------------------------------------------------------------------------------------------------------------------------------------------------------------------------------------------------------------------------------------------------------------------------------------------------------------------------------------------------------------------------------------------|
| Journal:                        | <i>BMJ Open</i>                                                                                                                                                                                                                                                                                                                                                                                                                                                                                                                                                      |
| Manuscript ID                   | bmjopen-2021-057892.R1                                                                                                                                                                                                                                                                                                                                                                                                                                                                                                                                               |
| Article Type:                   | Protocol                                                                                                                                                                                                                                                                                                                                                                                                                                                                                                                                                             |
| Date Submitted by the Author:   | 12-Feb-2022                                                                                                                                                                                                                                                                                                                                                                                                                                                                                                                                                          |
| Complete List of Authors:       | Ali, Samina; University of Alberta, Pediatrics<br>Rajagopal, Manasi; University of Alberta, Pediatrics<br>Stinson, Jennifer; Toronto SickKids<br>Ma, Keon; University of Calgary Cumming School of Medicine, Pediatrics<br>Vandermeer, Ben; University of Alberta, Pediatrics<br>Felkar, Bailey; London Health Sciences Centre, Pediatrics<br>Schreiner, Kurt; University of Alberta, Pediatric Parents' Advisory Group<br>Proctor, Amanda; Alberta Health Services<br>Plume, Jennifer; Alberta Health Services<br>Hartling, Lisa; University of Alberta, Pediatrics |
| <b>Primary Subject Heading</b>: | Paediatrics                                                                                                                                                                                                                                                                                                                                                                                                                                                                                                                                                          |
| Secondary Subject Heading:      | Anaesthesia                                                                                                                                                                                                                                                                                                                                                                                                                                                                                                                                                          |
| Keywords:                       | ACCIDENT & EMERGENCY MEDICINE, Pain management < ANAESTHETICS, Paediatric A&E and ambulatory care < PAEDIATRICS, PAIN MANAGEMENT                                                                                                                                                                                                                                                                                                                                                                                                                                     |
|                                 |                                                                                                                                                                                                                                                                                                                                                                                                                                                                                                                                                                      |

SCHOLARONE™  
Manuscripts

**Title:** A study protocol for a randomized controlled trial of virtual reality-based distraction for intravenous insertion-related distress in children

**Lay Title:** Virtual Reality Based Distraction for Painful Procedures in Children

**Authorship:** Samina Ali MDCM<sup>1,2,\*</sup>, Manasi Rajagopal MBT<sup>1</sup>, Jennifer Stinson<sup>3</sup>, Keon Ma MD<sup>4</sup>, Ben Vandermeer MSc<sup>5</sup>, Bailey Felkar MS CCLS<sup>6</sup>, Kurt Schreiner MPM<sup>7</sup>, Amanda Proctor<sup>8</sup>, Jennifer Plume BM, MA MTA<sup>9</sup>, Lisa Hartling PhD<sup>1,5</sup>

1 Department of Pediatrics, Faculty of Medicine & Dentistry, University of Alberta, Edmonton, Alberta, Canada

2 Women & Children's Health Research Institute, University of Alberta, Edmonton, Alberta, Canada

3 Child Health Evaluative Sciences, Research Institute, The Hospital for Sick Children and the Lawrence S. Bloomberg Faculty of Nursing, University of Toronto, Toronto, Ontario, Canada

4 Department of Pediatrics, Cumming School of Medicine, University of Calgary, Calgary, Alberta, Canada

5 Alberta Research Centre for Health Evidence, Department of Pediatrics, University of Alberta, Edmonton, Alberta, Canada

6 London Health Sciences Centre Children's Hospital, London, Ontario, Canada

7 Pediatric Parents' Advisory Group, University of Alberta, Edmonton, Canada

8 Stollery Youth Advisory Council and Patient and Family Centred Care, Edmonton, Alberta, Canada

9 Stollery Children's Hospital, Edmonton, Alberta, Canada

\*denotes corresponding author, and contact for public and scientific inquiries

3-583 Edmonton Clinic Health Academy

11405 – 87 Avenue

Edmonton, AB T6G 1C9

Phone: (780) 248-5574

Fax: (888) 775-8876

Email: [sali@ualberta.ca](mailto:sali@ualberta.ca)

Keywords: virtual reality, distress, pain, distraction, pediatrics, intravenous

Trial Protocol Version 15 July 2020

Trial Registration: [clinicaltrials.gov](http://clinicaltrials.gov) NCT04291404

WHO Trial Registration Data Set: See Table 1

Word Count: 3963/ 4000 words

## ABSTRACT

**Introduction.** Intravenous (IV) insertions are among the most performed procedures for children seeking medical care; they are often a painful and stressful experience for both children and their caregivers. Pediatric distress and pain that is inadequately treated may lead to a frightened and uncooperative child, repeated IV attempts and overall frustration with care for both the family and clinical team. We hypothesize that distraction via an immersive virtual reality (VR) experience may reduce the associated distress for children undergoing IV insertions.

### **Methods and analysis.**

This two-armed randomized controlled superiority trial will be conducted in a Canadian pediatric emergency department and will aim to enroll 80 children overall. Children will be randomized to receive either departmental standard of care alone or standard of care plus an immersive VR experience. Children 6 to 17 years of age who are undergoing IV insertion and have topical anesthetic application will be considered for inclusion. Our primary objective is to compare the reduction of distress between the two study arms. The primary outcome will be the child's observed distress score as measured by the Observational Signs of Behavioral Distress-Revised (OSBD-R) tool. Secondary outcomes include the child's pain intensity and fear, parental anxiety, satisfaction with the IV procedure, as well as adverse events. Recruitment launched in September 2020 and is expected to end in March 2022.

**Ethics and dissemination.** This study has been approved by the Health Research Ethics Board (University of Alberta). Informed consent will be obtained from parents or guardians, and assent from children. Study data will be submitted for publication irrespective of results. This study is funded through a Women and Children's Health Research Institute Innovation grant. Purchase of the VR equipment was facilitated through a Stollery Children's Hospital Foundation small equipment grant.

**Trial registration number:** NCT04291404, First registered March 02, 2020

**Words: 299/ 300**

## Article Summary

### Strengths and limitations of this study

1. This randomized controlled trial will assess the effectiveness of immersive virtual reality-based distraction for the reduction of IV insertion-related distress in children.
2. This study measures patient- and family-relevant outcomes including child distress, pain, fear, and safety as well as parental anxiety and satisfaction.
3. The study team includes parent and patient partners as co-investigators who will inform study methods and outcomes.
4. The study intervention will be compared to current standard of care; however, since there is no consistent standard of care distraction practice, this may create some heterogeneity in the comparison arm of the study.
5. Given the nature of the study intervention, it is not possible to blind patients, parents/caregivers, health care providers, or outcome assessors; the statistician will be blinded to study arms.

## INTRODUCTION

Needle procedures, including venipuncture and intravenous (IV) placement, are described by children as some of the most distressing and painful parts of their healthcare visit. [1-4] Untreated distress and pain can lead to a scared and uncooperative child, a need for repeated IV attempts, reduced efficiency and overall dissatisfaction with care for the patient, family and the health care team. [3, 5, 6] Unpleasant medical encounters in childhood can also shape an individual's perception of healthcare and expectations of pain in adulthood. [7-9] This can result in increased anticipatory anxiety and pain for future medical procedures or an avoidance of healthcare services, altogether. [1] As needle procedures form a routine and necessary part of care in the emergency department (ED), it is an important responsibility of health care providers to adequately manage children's distress and pain, wherever possible.[10,11]

The recommended and responsible approach to managing children's procedural pain incorporates physical, psychological, and pharmacological components. [10-15] While pharmacological interventions such as topical anesthetic creams are available, their effectiveness is limited to *pain*, as they do not address procedure-related *distress and anxiety*. [10] Distraction therapy is a commonly employed psychological strategy which involves engaging children in a cognitive task or activity to divert attention away from nociceptive stimuli. [16] An effective distractor provides sensory stimulation and is highly engaging and age-appropriate to fully capture the attention of a child. [12,16] Previous research has indicated that children who use distraction as an active form of coping experience reduced pain and distress during painful procedures. [12, 17, 18] Traditional distraction techniques such as music, video, stories, imagery, and focused breathing have been previously explored for children undergoing unpleasant medical procedures and demonstrated mixed results. [19-24] Our team's recently conducted systematic review of digital technologies has suggested that digital distraction techniques appear promising, but require further study to confirm their utility for painful procedures. [25]

Virtual Reality (VR) technology is rapidly emerging as a novel distraction tool for children undergoing various medical procedures. Unlike traditional distraction techniques, VR uses a combination of visual, auditory, and tactile stimuli to create the illusion of being fully immersed in an artificial three-dimensional environment. [26] A Head Mounted Display (or 'VR goggles') delivers the VR video and audio to the child, and serves to block out the view and sounds of the hospital room. [14] This further removes the patient from the chaos of the treatment room and diverts their attention away from surrounding painful and anxiety-evoking stimuli. To date, VR distraction therapy has shown promise for patients undergoing a range of distressing healthcare procedures, including burn wound cleaning, chest radiography, dental interventions, and chemotherapy. [27-32] Therapeutic VR has also led to improved health outcomes for patients with anxiety disorders, phobias, post-traumatic stress disorder, and eating disorders. [33-36]

1  
2  
3 The ED presents unique challenges when attempting to distract a child during a painful  
4 medical procedure. Due to the chaotic, noisy, and unpredictable environment, it is an  
5 ideal place to ‘stress-test’ the ability of VR technology to immerse a child into a  
6 distracting and ‘safe’ space. Rapid advances in VR technology over the last few years,  
7 and improved cost-effectiveness, offers a unique opportunity to explore its use in the ED  
8 setting. A few recently published studies from the pediatric ED setting suggest that VR  
9 has a positive impact on IV insertion-related pain and satisfaction, [12, 14, 37-40]  
10 although outcomes such as distress and adverse effects remain poorly studied. [38]  
11 Recent systematic reviews, which have mostly focused on non-ED and in-patient  
12 settings, have shown that the current evidence is inconclusive, sometimes contradictory,  
13 and have called for further research in larger study groups. [41-42] Furthermore many  
14 previous trials utilize proprietary software designed specifically for medical use which  
15 may limit widespread accessibility to all centers. This study will evaluate an “off-the-  
16 shelf” device with a range of widely accessible software.  
17  
18  
19

20 This study will evaluate the effectiveness of a VR intervention in reducing IV placement-  
21 related distress for children 6-17 years old presenting to the ED. We hypothesize that the  
22 use of immersive VR distraction will reduce children’s IV related distress when  
23 compared with standard of care and will improve overall satisfaction with the procedure  
24 for the patient, family, and the health care team.  
25  
26

## 27 **METHODS AND ANALYSIS**

28  
29 This study is a two-armed, randomized, controlled superiority trial. The study protocol is  
30 reported using the SPIRIT-PRO reporting guidelines. [43] (See Table 1.)  
31  
32  
33  
34  
35  
36  
37  
38  
39  
40  
41  
42  
43  
44  
45  
46  
47  
48  
49  
50  
51  
52  
53  
54  
55  
56  
57  
58  
59  
60



Table 1. WHO Trial Registration Data Set

| <b>Data Category</b>                          | <b>Information</b>                                                                                                                                                                                                                                                                                                                                                                                                                                                                                                                                                                                                                                                                                                                                                                                                                                                                                                                            |
|-----------------------------------------------|-----------------------------------------------------------------------------------------------------------------------------------------------------------------------------------------------------------------------------------------------------------------------------------------------------------------------------------------------------------------------------------------------------------------------------------------------------------------------------------------------------------------------------------------------------------------------------------------------------------------------------------------------------------------------------------------------------------------------------------------------------------------------------------------------------------------------------------------------------------------------------------------------------------------------------------------------|
| Primary Registry and Trial Identifying Number | clinicaltrials.gov NCT04291404                                                                                                                                                                                                                                                                                                                                                                                                                                                                                                                                                                                                                                                                                                                                                                                                                                                                                                                |
| Date of Registration in Primary Registry      | March 2, 2020                                                                                                                                                                                                                                                                                                                                                                                                                                                                                                                                                                                                                                                                                                                                                                                                                                                                                                                                 |
| Secondary Identifying Numbers                 | University of Alberta Research Ethics Board # Pro00095418                                                                                                                                                                                                                                                                                                                                                                                                                                                                                                                                                                                                                                                                                                                                                                                                                                                                                     |
| Source(s) of Monetary or Material Support     | Stollery Children's Hospital Foundation and the Women and Children Health Research Institute Innovation Grant                                                                                                                                                                                                                                                                                                                                                                                                                                                                                                                                                                                                                                                                                                                                                                                                                                 |
| Primary Sponsor                               | University of Alberta                                                                                                                                                                                                                                                                                                                                                                                                                                                                                                                                                                                                                                                                                                                                                                                                                                                                                                                         |
| Secondary Sponsor(s)                          | -                                                                                                                                                                                                                                                                                                                                                                                                                                                                                                                                                                                                                                                                                                                                                                                                                                                                                                                                             |
| Contact for Public Queries                    | Dr. Samina Ali 780.248.5575 sali@ualberta.ca                                                                                                                                                                                                                                                                                                                                                                                                                                                                                                                                                                                                                                                                                                                                                                                                                                                                                                  |
| Contact for Scientific Queries                | Dr. Samina Ali 780.248.5575 sali@ualberta.ca                                                                                                                                                                                                                                                                                                                                                                                                                                                                                                                                                                                                                                                                                                                                                                                                                                                                                                  |
| Public Title                                  | The Virtual Reality Trial                                                                                                                                                                                                                                                                                                                                                                                                                                                                                                                                                                                                                                                                                                                                                                                                                                                                                                                     |
| Scientific Title                              | A randomized controlled trial of virtual reality-based distraction for intravenous insertion-related distress in children                                                                                                                                                                                                                                                                                                                                                                                                                                                                                                                                                                                                                                                                                                                                                                                                                     |
| Countries of Recruitment                      | Canada                                                                                                                                                                                                                                                                                                                                                                                                                                                                                                                                                                                                                                                                                                                                                                                                                                                                                                                                        |
| Health Condition(s) or Problem(s) Studied     | Intravenous insertion-related distress                                                                                                                                                                                                                                                                                                                                                                                                                                                                                                                                                                                                                                                                                                                                                                                                                                                                                                        |
| Intervention(s)                               | Addition of distraction via an immersive virtual reality experience to departmental standard of care during the intravenous (IV) insertion procedure                                                                                                                                                                                                                                                                                                                                                                                                                                                                                                                                                                                                                                                                                                                                                                                          |
| Key Inclusion and Exclusion Criteria          | To be eligible to participate in this study, an individual must meet all of the following inclusion criteria: <b>(a)</b> child aged 6–17 years; <b>(b)</b> requires IV placement; and <b>(c)</b> will receive topical anesthetic cream for IV placement. Children meeting any of the following criteria will be excluded: <b>(a)</b> medically unstable; <b>(b)</b> unconscious or not fully alert; <b>(c)</b> visual, auditory cognitive, or mental health issues precluding safe interaction with the VR intervention; <b>(d)</b> conditions that could be exacerbated by the VR environment, such as <i>current</i> symptomatic nausea / vomiting / dizziness/migraine, or a <i>history</i> of psychosis/hallucinations/epilepsy; <b>(e)</b> presence of an infection/injury which could contaminate the VR intervention equipment such as open wounds/ infections of the head and neck area, or suspected/confirmed methicillin-resistant |

|                          |                                                                                                                                                                                                                                                                                                                                                                                                                                                                                                                                                                                                                                                                                                                                    |
|--------------------------|------------------------------------------------------------------------------------------------------------------------------------------------------------------------------------------------------------------------------------------------------------------------------------------------------------------------------------------------------------------------------------------------------------------------------------------------------------------------------------------------------------------------------------------------------------------------------------------------------------------------------------------------------------------------------------------------------------------------------------|
|                          | <i>Staphylococcus aureus</i> colonization; <b>(f)</b> screens positive for ‘influenza-like illness’ as per departmental screening criteria; <b>(g)</b> language barrier precluding the ability to understand and complete study assessments, in the absence of a native language translator; or <b>(h)</b> previous enrollment in this study.                                                                                                                                                                                                                                                                                                                                                                                      |
| Study Type               | Randomized Controlled Superiority Trial                                                                                                                                                                                                                                                                                                                                                                                                                                                                                                                                                                                                                                                                                            |
| Date of First Enrollment | October 5, 2020                                                                                                                                                                                                                                                                                                                                                                                                                                                                                                                                                                                                                                                                                                                    |
| Sample Size              | 80                                                                                                                                                                                                                                                                                                                                                                                                                                                                                                                                                                                                                                                                                                                                 |
| Recruitment Status       | Actively recruiting                                                                                                                                                                                                                                                                                                                                                                                                                                                                                                                                                                                                                                                                                                                |
| Primary Outcome(s)       | The primary outcome will be the child’s total observed distress score during the IV procedure as measured on the Observational Signs of Behavioral Distress-Revised (OSBD-R) tool.                                                                                                                                                                                                                                                                                                                                                                                                                                                                                                                                                 |
| Key Secondary Outcomes   | Secondary outcomes include: <b>(a)</b> the child’s self-reported pain score during the IV procedure, using an 11-point 0-10 verbal Numerical Rating Scale (vNRS); <b>(b)</b> the child’s self-reported fear score during the IV insertion as measured by the Children’s Fear Scale (CFS); <b>(c)</b> parental/caregiver anxiety associated with the procedure, as assessed by the State Trait Anxiety Inventory - State Trait Revised Version (STAI-S, Form Y); <b>(d)</b> satisfaction with the procedure for the child, their parent/caregiver and the nurse inserting the IV, as assessed by a 5-point Likert scale; and <b>(e)</b> the proportion of children who experience adverse events related to the study intervention. |
| Ethics Review            | University of Alberta Research Ethics Board # Pro00095418                                                                                                                                                                                                                                                                                                                                                                                                                                                                                                                                                                                                                                                                          |
| Completion date          | -                                                                                                                                                                                                                                                                                                                                                                                                                                                                                                                                                                                                                                                                                                                                  |
| Summary Results          | -                                                                                                                                                                                                                                                                                                                                                                                                                                                                                                                                                                                                                                                                                                                                  |
| IPD sharing statement    | De-identified data can be shared, on a case-by-case basis, upon discussion with the principal investigator.                                                                                                                                                                                                                                                                                                                                                                                                                                                                                                                                                                                                                        |

### Setting and Study Period

This study will be conducted in the Stollery Children's Hospital (SCH) emergency department in Edmonton, Alberta, Canada. The SCH is a tertiary care hospital whose annual ED census is typically approximately 60,000. The 2020 ED census for the SCH was reduced to 36,899 due to the COVID-19 pandemic. Recruitment launched in September 2020 and is expected to end in March 2022. Based on our team's previous experience conducting research in this setting, and considering the ongoing pandemic-related considerations, we anticipate 18 months of recruitment to meet our overall target of 80 patients.

### Eligibility and Exclusion Criteria

Children will be eligible if they are 6 to 17 years, require an IV placement during their ED visit, and have received topical anesthetic cream for their IV placement. This age group was chosen as they can reliably self-report pain and are expected to benefit from the virtual reality study intervention, based on prior studies. [44] Due to ethical and pragmatic considerations, we insisted that children must be receiving topical anesthetic cream for IV placement to be eligible for our study, as it is effective and considered standard of care within our hospital. [10] Exclusion criteria are detailed in Table 1.

### Study Intervention and Comparison

The intervention will include the use of an immersive VR application that will engage children for the duration of the IV procedure. The VR intervention will be provided *in addition to* standard of care. The child will wear the VR goggles (Oculus Quest, Oculus, Facebook Technologies, LLC; see Figure 1) and small handheld controllers (optional) can be used to interact with the virtual environment and change settings. The VR goggles will occlude the patient's view of the treatment room, and a pair of noise-cancelling headphones (optional) can be used to block out ambient hospital sounds. Together, this will provide the child with a unique vivid experience of being fully immersed or "present" inside the 3D virtual world. The child will be presented with one of two VR menu options, one for novice users and another for more experienced users. The menus will have pre-selected VR applications that are suitable for use during the IV procedure and will include a combination of interactive games and immersive 3D movies designed specifically for a virtual reality experience (see Figure 2). The choice of applications was based on consultation with the Stollery Children's Hospital Youth Advisory Committee prior to commencing the study. The shortlisted applications were then tested by the principal investigators, other team members, and youth. The research assistant (RA), who will be trained in proper equipment use and troubleshooting, will help the child with selecting and running the VR game/movie. Based on child and nursing preference, children may either sit up or lie in a supine position for the duration of the procedure. The chosen VR games will not require the child to move their torso or both arms, to not interfere with the IV placement. The VR goggles can be removed at any time during the procedure if the child so desires. The game/application selected by the child will be recorded on the case report form.

1  
2  
3 The control group will receive departmental standard of care which will include topical  
4 anesthetic cream (mandatory for inclusion in the study) and may include parent/caregiver  
5 support, child life services, nursing support, and other support strategies at the discretion  
6 of the ED clinical care team and the family. Child life services include pre-procedural  
7 education, distraction and coaching, intra-procedural presence, and post-procedural  
8 support and prizes. At present, there is no single established distraction therapy or routine  
9 that is consistently employed for IV procedures within our ED. Thus, for pragmatic and  
10 ethical considerations, it is felt that the new study VR intervention should be compared to  
11 what is currently already in practice (i.e., standard of care). Generally, VR technology is  
12 not employed by the nursing staff for distracting the child. However, other forms of  
13 technology (i.e., smart phones, tablets) will *not* be prohibited in the control group if the  
14 family chooses to offer them. Use of other devices and distraction techniques will be  
15 documented.  
16  
17  
18

### 19 **Randomization, Allocation Concealment, and Blinding**

20 Randomization will be determined using an online randomization tool hosted on the  
21 REDCap [45] (Research Electronic Data Capture) platform. Following documentation of  
22 informed consent and assent, the RA will obtain the computer-generated randomized  
23 assignment for the child by clicking on the 'Randomize' button within the study-specific  
24 REDCap case report form. Allocation will be concealed from the research staff, ED  
25 clinical staff and the family until this point. However, due to the nature of the  
26 intervention, it is not possible to maintain blinding once the child has been randomized.  
27  
28

29 Children and their parents/caregivers will be informed that the study will evaluate and  
30 compare different forms of distraction, however they will not be made aware of the study  
31 hypothesis for the VR intervention. Furthermore, the statistician will be blinded to  
32 treatment assignment by using randomization codes until data analysis is complete.  
33  
34

### 35 **Recruitment and Data Collection**

36 Participant recruitment will occur in the SCH ED when RAs are on-site, from  
37 approximately 15:00 to 23:00 daily. Based on our team's previous research, this time  
38 frame corresponds with peak ED volume. RAs will screen the electronic ED track board  
39 and communicate with on-site clinical staff to identify potentially eligible patients. The  
40 RA will then further assess eligibility based on the inclusion/exclusion criteria detailed  
41 above. If the child is deemed eligible and the family is willing to participate, the RA will  
42 obtain written informed consent from the parent/ caregiver and assent from the child (See  
43 Appendix 1). One parent/caregiver for each child will be asked to provide consent and  
44 complete all relevant study questionnaires.  
45  
46

47  
48 Prior to the beginning of the IV procedure, the RA will collect baseline information,  
49 including: baseline heart rate, pre-procedure distress, fear, and pain scores from the child,  
50 and pre-procedure anxiety score from the parent/caregiver. The RA will then access the  
51 randomization tool on REDCap to reveal the child's group assignment (VR intervention  
52 or Control).  
53  
54  
55  
56  
57  
58

1  
2  
3 For the VR intervention group, the RA will set up the VR equipment and spend  
4 approximately 5-10 minutes explaining the intervention to the child, including proper use  
5 of the goggles and controller. The RA will then help the child put on and secure the  
6 goggles and headphones, and hand them the controller. They will document the time  
7 required for equipment set up as well as any technical challenges encountered. As per  
8 hospital infection control policy, all VR equipment including the goggles, headphones  
9 and controller will be sanitized with disinfectant wipes between participants. A  
10 disposable one-time use cover will be placed on the goggles for each participant. For all  
11 participants (both study arms), the RA will begin video recording the child five minutes  
12 prior to the start of the procedure and continue until 5 minutes post-procedure, to allow  
13 for complete coding of OSBD-R distress scores at a later time.  
14  
15  
16  
17  
18

19 For all participants (both study arms), the staff nurse will insert the IV following  
20 institutional protocol. In keeping with the pragmatic design of the trial, no additional or  
21 study-specific instructions will be provided to either nurses or parents/caregivers  
22 regarding their behaviour during the procedure. For purposes of the study, the start of the  
23 IV insertion procedure will be marked by the cleaning of the IV site by the staff nurse.  
24 The end of the procedure will be defined by the last point of contact by the staff nurse  
25 (i.e., taping cannula in place with or without arm board, wrapping arm with gauze and  
26 taping the gauze in place).  
27  
28

29 During the procedure, the RA will closely monitor the child for any adverse effects. The  
30 child will also be asked to let the team know immediately if they are experiencing any  
31 adverse events or discomfort related to the VR intervention (i.e., dizziness, nausea,  
32 headache). The VR intervention can be discontinued (i.e., the headset can be removed) at  
33 any time, at the discretion of the child or clinical team. If an adverse event were to occur,  
34 the clinical team will be notified, and details will be logged in the REDCap adverse event  
35 log. Additionally, the RA will make a note of any technical failures or issues associated  
36 with the VR equipment during enrollment.  
37  
38

39 Immediately following the first *attempt* at IV placement (regardless of whether it was  
40 successful), the RA will collect post-procedure distress, fear and pain scores from the  
41 child, and post-procedure anxiety score from the parent/caregiver. A few minutes after  
42 completion of the IV placement, satisfaction and acceptability questionnaires will be  
43 completed with the child, parent /caregiver as well as the staff nurse responsible for  
44 inserting the IV. Five minutes after the procedure is completed, the RA will stop the  
45 video recording. The duration of the procedure and total number of IV attempts will be  
46 documented. If the first attempt at placement is unsuccessful, any additional attempts will  
47 occur after all relevant study questionnaires/measurements have been completed.  
48  
49  
50  
51

52 Demographic information, previous history and visit details will also be collected from  
53 the family and the child's medical chart. See Figure 3 for study flow schematic.  
54  
55

## 56 Outcome Measures

57  
58  
59  
60

Our primary outcome is **distress**. Our secondary outcomes are **(a)** pain; **(b)** fear; **(c)** the parental/caregiver anxiety; and **(d)** parental/caregiver and nurse satisfaction with the procedure in the intervention; and **(e)** safety.

Our primary outcome measure will be the child's total distress score during the IV procedure. Distress associated with the procedure will be assessed using the Observational Scale of Behavioral Distress-Revised (OSBD-R). The OSBD-R is a validated scale that is widely used to measure pain and distress associated with various medical procedures in children. [46-48] The tool assesses eight specific behaviors that are indicative of distress and are weighted according to intensity: information seeking, crying, screaming, restraint, verbal resistance, emotional support, verbal pain, and flailing. Study participants will be videotaped for the duration of the IV procedure as well as for a few minutes before and after; distress will be scored pre-, during, and post-procedure. Two RAs who are trained in the use of the tool will independently observe the videotapes and record the frequency of each of the eight behaviors during continuous 15-second intervals. To ensure high inter-rater reliability, the first 10% of coded videos will be analyzed for inter-rater reliability and RAs will be provided with feedback and re-training, as needed, prior to coding the remaining videos. The mean OSBD-R scores between the two RAs will be used as the final scores. This standardized procedure for OSBD-R has been successfully used in previous research evaluating distraction. [29, 49-52] This scale demonstrates high inter-rater reliability as well as moderate to high correlations with other behavioral measures of distress. [49, 53-54]

Our principal secondary outcome measure will be the child's pain score during the IV procedure. Pain will be measured using an 11-point verbal Numerical Rating Scale (vNRS) ranging from 0 (no pain) to 10 (worst possible pain). This scale is a commonly used pain measurement tool in pediatric acute pain studies and is validated for use in children 6-17 years of age. [55-58] Pain scores will be self-reported by children both before and immediately following the IV procedure.

Fear will be measured using the Children's Fear Scale (CFS) [4, 59]. This scale depicts five faces representing increasing levels of anxiety, where the left-most face depicts "not scared at all" (score=0) and the right most-face means "most scared possible" (score=4). The CFS is an adaptation of the adult Faces Anxiety Scale [59] and has been validated to measure fear in children undergoing painful medical procedures. [4] Children will be asked to independently rate their fear both before and immediately following the IV procedure.

Parental/Caregiver anxiety will be measured with the State Trait Anxiety Inventory – State Scale Revised Version (STAI-S, Form Y), a validated and commonly used version of STAI, which has improved psychometric properties. [60] Parents/caregivers will be asked to complete the STAI questionnaire both before and immediately following the IV procedure.



Parent/caregiver and nurse satisfaction with the procedure will be measured using a 5-point Likert scale, ranging from 1 “Very dissatisfied” to 5 “Very satisfied”. Child satisfaction with the procedure will be measured using a 5-point Likert scale, ranging from 1 “Not at all happy” to 5 “Very happy”. Satisfaction scores will be collected immediately following the IV procedure.

Safety of the VR intervention will be determined by assessing the frequency of adverse events post intervention. Specifically, nausea will be self-rated by children immediately following the intervention, using the Baxter Retching Faces (BARF) scale [61]. This scale consists of 6 faces depicting increasing levels of nausea, with assigned scores ranging from 0 to 10. The BARF scale is widely used in medical research and has demonstrated construct, content, and convergent validity as a tool to measure nausea in children. [61] The presence of other adverse events (i.e., dizziness) will also be recorded by the RA. Children who are presenting with nausea, vomiting, dizziness or migraines *prior* to enrollment will be excluded from the study to avoid exacerbating these conditions with the use of the VR equipment.

### Sample Size

The sample size for the study is 80 patients overall. Sample size calculations were conducted using a two-tailed, two-sample Mann-Whitney test for the primary outcome of observed behavioral distress based on data from the team’s previous trial of digital distraction. To detect a large effect size of 0.6 on the OSBD-R (which was observed in a previous trial), given a Type I error of 0.05 and 80% power, the study will require 35 patients for each of the two study arms. To account for attrition and technical recording failures, the team will plan to over-recruit by 10-15%, for an overall total of 80 patients. This will allow sufficient power to find a difference in the primary outcome if a difference truly exists.

### Statistical Methods

Statistical analyses will be conducted using statistical software SAS (version 9; SAS Institute, Cary, NC). The significance level will be set at 0.05. Baseline variables will be described using appropriate summary statistics for each group. Imbalances between groups for key baseline variables will indicate the need for further adjusted analyses. For the primary outcome of observed behavioral distress, total OSBD-R scores will be compared between the two groups using independent samples t-tests if they are normally distributed or Mann-Whitney U-tests if they are skewed (the Sidak correction procedure will be used to reduce the probability of a Type I error). Additional model-based analyses (multiple linear regression) will be conducted, as needed, with behavioural distress as the response variable, pre-procedure behavioral distress and group indicators as the explanatory variables along with some possible effect modifiers such as age, sex, and parental/caregiver anxiety levels. Our primary analysis will be based on an intention-to-treat approach where all children who were randomly assigned to a study group will be included in the group to which they were randomized. Where cell sizes are small or data are sparse or missing, proxy information or appropriate imputation methods will be used as needed. Similar approaches will be used to compare the groups with respect to secondary outcomes if appropriate.



### **Patient and Public Involvement**

The team's parent advisor (KS) has provided ongoing input on the study protocol and design, and has provided valuable feedback on the content, flow and readability of the consent forms and data collection forms. The Stollery Youth Advisory Council, led by team member AP, provided input on the study design, outcomes measures, and types of virtual reality applications that might be engaging and practical for our study population. AP also reviewed the study protocol and related documents to ensure that the outcomes and tools were patient-relevant and age-appropriate. Following recruitment completion, parent and youth advisors will be further engaged to discuss study results and dissemination plans in the context of patient- and family-centered care.

### **Data Management and Confidentiality**

Data will be entered into a secure online REDCap [45] database hosted by the Women and Children's Health Research Institute (WCHRI). (See Appendix 2 for Case Report Form.) WCHRI's REDCap installation is a validated electronic, web-based data capture system housed in a secure data center at the University of Alberta. Data is entered into REDCap through a web-based interface using 128-bit SSL encryption. Each team member will be granted an individual username/ password and will require additional two factor authentication to log in. All datasets used for statistical analysis will be encrypted and devoid of any patient identifiers. For internal data quality control, a secure master list will be maintained to accurately link study IDs to the patient's medical record.

Selected data elements will be validated electronically throughout the recruitment period and any discrepancies will be assigned to team members for timely resolution. REDCap includes internal quality checks, such as automatic range checks, to identify data that appear inconsistent, incomplete, or inaccurate.

Study data will be entered directly into REDCap in real-time via research iPads or, in some cases (i.e., parent/caregiver indicate a preference to complete paper-based questionnaires), responses may be collected on paper first and then transcribed into REDCap by a trained RA. All paper documents (including study questionnaires, consent/assent forms, and the master list) will be stored in a locked cabinet in a secure location that is only accessible to authorized research staff members. Study videos will be stored electronically in a secure institutional shared drive with restricted access to study staff. Videos will be saved according to their study ID only. The centrally compiled dataset will be stored on a secure server and computers at the University of Alberta. Following completion of the study, all data will continue to be kept in a secure location for five years as dictated by the research ethics board.

### **ETHICS AND DISSEMINATION**

This study has received approval from the Health Research Ethics Board (HREB) at the University of Alberta (HREB identifier: Pro00073476). Any amendments to the study protocol or documents will be submitted for HREB review and will receive approval prior to implementation. Significant protocol amendments will also be reflected online on

1  
2  
3 the clinicaltrials.gov study registration. This study has also received operational approval  
4 from the SCH ED.  
5  
6

7 All children will receive the best possible care for their presenting complaint, regardless  
8 of whether they choose to participate. It is possible that patients in the VR intervention  
9 group may experience nausea, mild motion sickness or dizziness, however these effects  
10 are rare in children and adolescents, ranging from 0-5%. [62, 63] VR applications have  
11 been selected appropriately to minimize these discomforts, and children are monitored  
12 closely throughout the study for any adverse effects. Children experiencing nausea,  
13 vomiting, dizziness or migraine headaches prior to enrollment will be excluded to avoid  
14 potential exacerbation. Study participation is unlikely to prolong the ED length of stay.  
15 For infection-control purposes, children screening positive for 'influenza-like illness' (as  
16 per ED screening criteria) are excluded to prevent potential contamination of the VR  
17 equipment.  
18  
19  
20  
21  
22

23 Due to resource/logistical constraints, study recruitment will be limited to English-  
24 speaking families or those with their own interpreter, at a single recruiting center, and  
25 during RA shift hours only. Critically ill children requiring immediate IV insertion will  
26 also be excluded to avoid delaying medical care. This may limit the generalizability of  
27 the study findings. We will not be controlling for the type of distraction used in the  
28 standard of care arm, but we will record what was employed. While this may create some  
29 heterogeneity in the comparison arm of the study, it will be a pragmatic reflection of  
30 clinical reality. Due to the nature of the intervention, blinding is not possible for the  
31 participants or the research personnel, though the statistician will be blind to study group.  
32  
33  
34

35 The study team plans to publish trial results in a high-impact, peer-reviewed journal and  
36 present results at national and international meetings; authorship eligibility will be  
37 determined by employing the International Committee of Medical Journal Editors'  
38 recommended guidelines. [64] Statistical code and dataset can be made available upon  
39 request.  
40  
41

42 **Competing Interests** None declared.  
43

44 **Patient Consent** After assessing eligibility based on the outlined inclusion/exclusion  
45 criteria, research assistants will obtain consent from the parents/caregivers (and assent  
46 from children older than 6 years) prior to enrolling the child in the study. The research  
47 assistant will provide both a verbal and written explanation of the study to the family.  
48 The family will be given an opportunity to review the consent/assent forms in private and  
49 can ask the research assistant any questions they might have prior to signing the  
50 consent/assent forms. The family is free to withdraw at any point during the study.  
51  
52

53 **Acknowledgments** The authors would like to thank the members of the Stollery Youth  
54 Advisory Council, who provided valuable input on the study design and  
55 gaming/application choices for the virtual reality headsets.  
56  
57  
58

## FUNDING STATEMENT

This work is funded by the generosity of the Stollery Children’s Hospital Foundation through the Women and Children’s Health Research Institute Innovation Grant. Purchase of the virtual reality goggles was facilitated through a generous small equipment grant from the Stollery Children’s Hospital Foundation. The funders do not have any role in the collection, management, analysis, or interpretation of data; writing of the report; or the decision to submit the report for publication. Dr. Hartling is supported by a Canada Research Chair in Knowledge Synthesis and Translation and is a Distinguished Researchers with the Stollery Science Lab supported by the Stollery Children’s Hospital Foundation.

## AUTHOR CONTRIBUTIONS

Dr. Samina Ali (SA) is a pediatric emergency clinician-researcher and Professor of Pediatrics & Emergency Medicine at the University of Alberta. She co-developed and revised the protocol and co-drafted the protocol paper. She chose the previously validated tools for measuring the primary outcomes.

Manasi Rajagopal (MR) is the program lead for the Pediatric Emergency Medicine research program at the University of Alberta and co-principal investigator of this study. She co-developed the study protocol, co-drafted the protocol paper, and will operationalize the study.

Dr. Jennifer Stinson (JS) is the Mary Jo Haddad Nursing Chair in Child Health at the Hospital for Sick Children's Research Institute and a nurse practitioner in the Department of Anesthesia's chronic pain program at the hospital. She assisted with the study design and protocol revision.

Dr. Keon Ma is a pediatric trainee at the University of Calgary, with expertise in OSBD-R coding. He assisted with the study design and protocol revision.

Ben Vandermeer (BV) led the statistical analysis planning and contributed to protocol revision.

Bailey Felkar (BF) is a child life specialist at the Stollery ED with expertise in managing children's pain and distress in the ED setting. She assisted with the study design and protocol revision.

Kurt Schreiner (KS) is a family partner who has provided input into study outcomes to ensure family-relevant outcomes are chosen and will inform our knowledge translation efforts to the public.

Amanda Proctor (AP) is the coordinator of the Stollery Youth Advisory Council. Together with the council, she informed programming choices for the virtual reality devices and has reviewed the protocol and related documents to ensure that the outcomes and tools are patient-relevant and age-appropriate.

Jennifer Plume (JP) is the acting director for Stollery child life services with expertise in managing children's pain and distress in the ED. She has informed study methods and will aid and support the development of our knowledge translation plan.

Dr. Lisa Hartling (LH) is a Professor in the Department of Pediatrics at the University of Alberta and Director of the Alberta Research Centre for Health Evidence (Edmonton, Canada). She assisted with the study design and drafting the protocol, and provides expertise in clinical trial methodology and statistical analyses.

1  
2  
3  
4  
5  
6  
7  
8  
9  
10  
11  
12  
13  
14  
15  
16  
17  
18  
19  
20  
21  
22  
23  
24  
25  
26  
27  
28  
29  
30  
31  
32  
33  
34  
35  
36  
37  
38  
39  
40  
41  
42  
43  
44  
45  
46  
47  
48  
49  
50  
51  
52  
53  
54  
55  
56  
57  
58  
59  
60

All authors have approved this final version of the protocol. None of the authors have financial or other conflicts of interests as they pertain to this study and its involved recruitment sites.

For peer review only

## Figures Legend

**Figure 1.** Child using virtual reality goggles in the emergency department

**Figure 2.** Virtual Reality Game Menus

**Figure 3.** Flow Diagram of Study Procedures

For peer review only

1  
2  
3  
4  
5  
6  
7  
8  
9  
10  
11  
12  
13  
14  
15  
16  
17  
18  
19  
20  
21  
22  
23  
24  
25  
26  
27  
28  
29  
30  
31  
32  
33  
34  
35  
36  
37  
38  
39  
40  
41  
42  
43  
44  
45  
46  
47  
48  
49  
50  
51  
52  
53  
54  
55  
56  
57  
58  
59  
60

For peer review only

**REFERENCES**

1. Stevens BJ, Abbott LK, Yamada J, et al; CIHR Team in Children's Pain. Epidemiology and management of painful procedures in children in Canadian hospitals, *Canadian Medical Association Journal*. 2011 Apr 19;183(7):E403-10.
2. Duff AJA. Incorporating psychological approaches into routine paediatric venepuncture, *Archives of Disease in Childhood* 2003;88:931-7 doi:10.1136/adc.88.10.931.
3. Sanchez Cristal N, Staab J, Chatham R, et al. Child Life Reduces Distress and Pain and Improves Family Satisfaction in the Pediatric Emergency Department, *Clin Pediatr (Phila)* 2018;57:1567-75 doi:10.1177/0009922818798386.
4. McMurtry CM, Noel M, Chambers CT, et al. Children's fear during procedural pain: Preliminary investigation of the Children's Fear Scale, *Health Psychology* 2011;30:780-8 doi:10.1037/a0024817.
5. McGrath PJ, McAlpine L. Psychologic perspectives on pediatric pain, *The Journal of Pediatrics* 1993;122:S2-8 doi:10.1016/S0022-3476(11)80002-8.
6. Drendel AL, Ali S. Ten Practical Ways to Make Your ED Practice Less Painful and More Child-Friendly, *Clinical Pediatric Emergency Medicine*. Volume 18, Issue 4, December 2017, 242- 255.
7. El-Housseiny AA, Alamoudi NM, Farsi NM, et al. Characteristics of dental fear among Arabic-speaking children: a descriptive study, *BMC Oral Health* 2014;14 doi:10.1186/1472-6831-14-118.
8. Fields H. How expectations influence pain, *Pain* 2018;159:S3-S10 doi:10.1097/j.pain.0000000000001272.
9. Noel M, Rabbitts JA, Tai GG, et al. Remembering Pain after Surgery: A Longitudinal Examination of the Role of Pain Catastrophizing in Children's and Parents' Recall, *Pain* 2015;156:800 doi:10.1097/j.pain.000000000000102.
10. Trottier ED, Doré-Bergeron MJ, Chauvin-Kimoff L, et al. Managing pain and distress in children undergoing brief diagnostic and therapeutic procedures. [CPS Position Statement], *Paediatrics & Child Health* 2019;24:509-21.
11. Friedrichsdorf SJ, Eull D, Weidner CA. A Children's Comfort Promise: how can we do everything possible to prevent and treat pain in children using quality improvement strategies? *Pediatric Pain Letter* 2016;18:26-30.
12. Dumoulin S, Bouchard S, Ellis J, et al. A Randomized Controlled Trial on the Use of Virtual Reality for Needle-Related Procedures in Children and Adolescents in the Emergency Department. , *Games for Health Journal* 2019;8:285-93.
13. Jain S, Hegenbarth MA, Humiston SG, et al. Increasing ED use of jet injection of lidocaine for IV-related pain management , *Pediatrics* 2017;139:e20161697.
14. Chan E, Hovenden M, Ramage E, et al. Virtual Reality for Pediatric Needle Procedural Pain: Two Randomized Clinical Trials, *The Journal of Pediatrics* 2019;209:160,167.e4 doi:10.1016/j.jpeds.2019.02.034.
15. Gaskell S. Evidence-based guidelines for the management of invasive and/or distressing procedures with children, *British Journal of Social Psychology* 2019.
16. McCaul KD, Malott JM. Distraction and coping with pain, *Pain* 1985;23:315.
17. Manne SL, Bakeman R, Jacobsen PB, et al. An analysis of a behavioral intervention for children undergoing venipuncture, *Health Psychology* 1994;13:556-66.



18. Vessey JA, Carlson KL, McGill J. Use of distraction with children during an acute pain experience, *Nursing Research* 1994;43:369-72 doi:10.1097/00006199-199411000-00009.
19. Klassen JA, Liang Y, Tjosvold L, et al. Music for Pain and Anxiety in Children Undergoing Medical Procedures: A Systematic Review of Randomized Controlled Trials, *Ambulatory Pediatrics* 2008;8:117-28 doi:10.1016/j.ambp.2007.12.005.
20. Cohen LL, Blount RL, Panopoulos G. Nurse Coaching and Cartoon Distraction: An Effective and Practical Intervention to Reduce Child, Parent, and Nurse Distress During Immunizations, *J Pediatr Psychol* 1997;22:355-70 doi:10.1093/jpepsy/22.3.355.
21. Cassidy K, Reid GJ, McGrath PJ, et al. Watch Needle, Watch TV: Audiovisual Distraction in Preschool Immunization, *Pain Med* 2002;3:108-18 doi:10.1046/j.1526-4637.2002.02027.x.
22. Downey LVA, Zun LS. The Impact of Watching Cartoons for Distraction During Painful Procedures in the Emergency Department, *Pediatric Emergency Care* 2012;28:1033 doi:10.1097/PEC.0b013e31826cac1a.
23. Young T, Griffin E, Phillips E, et al. Music as Distraction in a Pediatric Emergency Department, *Journal of Emergency Nursing* 2010;36:472-3 doi:10.1016/j.jen.2010.05.014.
24. Ha YO, Kim HS. The effects of audiovisual distraction on children's pain during laceration repair, *International Journal of Nursing Practice* 2013;19:20-7 doi:10.1111/ijn.12165.
25. Gates M, Hartling L, Shulhan-Kilroy J, et al. Digital Technology Distraction for Acute Pain in Children: A Meta-analysis, *Pediatrics* 2020;145 doi:10.1542/peds.2019-1139.
26. Ahmadpour N, Randall H, Choksi H, et al. Virtual Reality interventions for acute and chronic pain management, *International Journal of Biochemistry & Cell Biology* 2019;114:105568.
27. Sikka N, Shu L, Ritchie B, et al. Virtual Reality-Assisted Pain, Anxiety, and Anger Management in the Emergency Department, *Telemedicine and e-Health* 2019.
28. Hoffman HG, Doctor JN, Patterson DR, et al. Use of virtual reality for adjunctive treatment of adolescent burn pain during wound care: A case report, *Pain* 2000;1-2:305-9.
29. Han S, Park J, Choi SI, et al. Effect of Immersive Virtual Reality Education Before Chest Radiography on Anxiety and Distress Among Pediatric Patients: A Randomized Clinical Trial, *JAMA pediatrics* 2019 doi:10.1001/jamapediatrics.2019.3000.
30. Shetty V, Suresh LR, Hegde AM. Effect of Virtual Reality Distraction on Pain and Anxiety During Dental Treatment in 5 to 8 Year Old Children, *Journal of Clinical Pediatric Dentistry* 2019;43:97-102.
31. Furman E, Jasinevicius TR, Bissada NF, et al. Virtual Reality Distraction for Pain Control During Periodontal Scaling and Root Planing Procedures, *The Journal of the American Dental Association* 2009;140:1508-16 doi:10.14219/jada.archive.2009.0102.
32. Schneider SM, Hood LE. Virtual Reality: A Distraction Intervention for Chemotherapy, *Oncology nursing forum* 2007;34:39-46 doi:10.1188/07.ONF.39-46.

- 1  
2  
3  
4  
5  
6  
7  
8  
9  
10  
11  
12  
13  
14  
15  
16  
17  
18  
19  
20  
21  
22  
23  
24  
25  
26  
27  
28  
29  
30  
31  
32  
33  
34  
35  
36  
37  
38  
39  
40  
41  
42  
43  
44  
45  
46  
47  
48  
49  
50  
51  
52  
53  
54  
55  
56  
57  
58  
59
33. Gerardi M, Rothbaum BO, Ressler K, et al. Virtual reality exposure therapy using a virtual Iraq: Case report, *Journal of Traumatic Stress* 2008;21:209-13 doi:10.1002/jts.20331.
  34. Parsons TD, Rizzo AA. Affective outcomes of virtual reality exposure therapy for anxiety and specific phobias: A meta-analysis, *Journal of Behavior Therapy and Experimental Psychiatry* 2008;39:250-61 doi:10.1016/j.jbtep.2007.07.007.
  35. Botella C, Serrano B, Baños RM, et al. Virtual reality exposure-based therapy for the treatment of post-traumatic stress disorder: a review of its efficacy, the adequacy of the treatment protocol, and its acceptability, *Neuropsychiatr Dis Treat* 2015;11:2533-45 doi:10.2147/NDT.S89542.
  36. Marco JH, Perpiñá C, Botella C. Effectiveness of cognitive behavioral therapy supported by virtual reality in the treatment of body image in eating disorders: One year follow-up, *Psychiatry Research* 2013;209:619-25 doi:10.1016/j.psychres.2013.02.023.
  37. Litwin SP, Nguyen C, Hundert A, Stuart S, Liu D, Maguire B, Matava C, Stinson J. Virtual reality to reduce procedural pain during IV insertion in the pediatric emergency department: a pilot randomized controlled trial. *The Clinical Journal of Pain*. 2021 Feb 1;37(2):94-101.
  38. Goldman RD, Behboudi A. Virtual reality for intravenous placement in the emergency department—a randomized controlled trial. *European Journal of Pediatrics*. 2021 Mar;180(3):725-31.
  39. Chen YJ, Cheng SF, Lee PC, Lai CH, Hou IC, Chen CW. Distraction using virtual reality for children during intravenous injections in an emergency department: A randomised trial. *Journal of clinical nursing*. 2020 Feb;29(3-4):503-10.
  40. Osmanliu E, Trottier ED, Bailey B, Lagacé M, Certain M, Khadra C, Sanchez M, Thériault C, Paquin D, Côtés-Turpin C, Le May S. Distraction in the Emergency department using Virtual reality for INtravenous procedures in Children to Improve comfort (DEVINCI): a pilot pragmatic randomized controlled trial. *Canadian Journal of Emergency Medicine*. 2021 Jan;23(1):94-102.
  41. Lambert V, Boylan P, Boran L, et al. Virtual reality distraction for acute pain in children, *The Cochrane database of systematic reviews* 2020;10 doi:10.1002/14651858.CD010686.pub2.
  42. Czech O, Wrzeciono A, Rutkowska A, Guzik A, Kiper P, Rutkowski S. Virtual reality interventions for needle-related procedural pain, fear and anxiety—A systematic review and meta-analysis. *Journal of clinical medicine*. 2021 Jan;10(15):3248.
  43. Chan A, Tetzlaff JM, Altman DG, et al. SPIRIT 2013 statement: defining standard protocol items for clinical trials, *Ann Intern Med* 2013;158:200-7 doi:10.7326/0003-4819-158-3-201302050-00583.
  44. Hoffman HG, Rodriguez RA, Gonzalez M, et al. Immersive Virtual Reality as an Adjunctive Non-opioid Analgesic for Pre-dominantly Latin American Children With Large Severe Burn Wounds During Burn Wound Cleaning in the Intensive Care Unit: A Pilot Study, *Frontiers in human neuroscience* 2019;13 doi:10.3389/fnhum.2019.00262.
  45. Harris PA, Taylor R, Thielke R, et al. Research electronic data capture (REDCap)—A metadata-driven methodology and workflow process for providing translational

- research informatics support, *Journal of Biomedical Informatics* 2009;42:377-81 doi:10.1016/j.jbi.2008.08.010.
46. Jay SM, Elliott C. Observation Scale of Behavioral Distress-Revised. Information procedures, definitions of behaviors, OSBD Interval Coding Form. 1986.
47. Jay SM, Elliott C. Behavioral observation scales for measuring children's distress: The effects of increased methodological rigor, *Journal of Consulting and Clinical Psychology* 1984;52:1106-7 doi:10.1037/0022-006X.52.6.1106.
48. Tucker CL, Slifer KJ, Dahlquist LM. Reliability and Validity of the Brief Behavioral Distress Scale: A Measure of Children's Distress During Invasive Medical Procedures, *J Pediatr Psychol* 2001;26:513-23 doi:10.1093/jpepsy/26.8.513.
49. Elliott CH, Jay SM, Woody P. An Observation Scale for Measuring Children's Distress During Medical Procedures, *J Pediatr Psychol* 1987;12:543-51 doi:10.1093/jpepsy/12.4.543.
50. Megel ME, Houser CW, Gleaves LS. Children's Responses to Immunizations: Lullabies as a Distraction, *Issues in Comprehensive Pediatric Nursing* 1998;21:129-45 doi:10.1080/014608698265456.
51. Noguchi LK. The Effect of Music Versus Nonmusic on Behavioral Signs of Distress and Self-Report of Pain in Pediatric Injection Patients, *J Music Ther* 2006;43:16-38 doi:10.1093/jmt/43.1.16.
52. Hartling L, Newton AS, Liang Y, et al. Music to Reduce Pain and Distress in the Pediatric Emergency Department: A Randomized Clinical Trial, *JAMA Pediatrics* 2013;167:826-35 doi:10.1001/jamapediatrics.2013.200.
53. Stevenson MD, Bivins CM, O'Brien K, et al. Child Life Intervention During Angiocatheter Insertion in the Pediatric Emergency Department, *Pediatric Emergency Care* 2005;21:712 doi:10.1097/01.pec.0000186423.84764.5a.
54. Jay SM, Ozolins M, Elliott CH, et al. Assessment of children's distress during painful medical procedures, *Health Psychology* 1983;2:133-47 doi:10.1037/0278-6133.2.2.133.
55. von Baeyer CL. Children's self-report of pain intensity: what we know, where we are headed, *Pain research & management* 2009;14:39.
56. Miró J, Castarlenas E, de la Vega R, et al. Validity of three rating scales for measuring pain intensity in youths with physical disabilities, *Eur J Pain* 2016;20:130-7 doi:10.1002/ejp.704.
57. Castarlenas E, Jensen MP, von Baeyer CL, et al. Psychometric Properties of the Numerical Rating Scale to Assess Self-Reported Pain Intensity in Children and Adolescents: A Systematic Review, *Clin J Pain* 2017;33:376-83 doi:10.1097/AJP.0000000000000406.
58. Castarlenas E, Miró J, Sánchez-Rodríguez E. Is the verbal numerical rating scale a valid tool for assessing pain intensity in children below 8 years of age? *J Pain* 2013;14:297-304 doi:10.1016/j.jpain.2012.12.004.
59. McKinley S, Coote K, Stein-Parbury J. Development and testing of a Faces Scale for the assessment of anxiety in critically ill patients, *Journal of Advanced Nursing* 2003;41:73-9 doi:10.1046/j.1365-2648.2003.02508.x.
60. Spielberger CD, Sydeman SJ. State-trait anxiety inventory and state-trait anger expression inventory. Hillsdale, NJ: Lawrence Erlbaum Associates 1994:292-321.

- 1  
2  
3 61. Baxter AL, Watcha MF, Baxter WV, et al. Development and validation of a pictorial  
4 nausea rating scale for children. *Pediatrics* 2011;127:1542.  
5  
6 62. Gold JI, Mahrer NE. Is Virtual Reality Ready for Prime Time in the Medical Space?  
7 A Randomized Control Trial of Pediatric Virtual Reality for Acute Procedural Pain  
8 Management, *Journal of pediatric psychology* 2018;43 doi:10.1093/jpepsy/jsx129.  
9  
10 63. Hoffman HG, Patterson DR, Seibel E, et al. Virtual reality pain control during burn  
11 wound debridement in the hydrotank, *The Clinical journal of pain* 2008;24  
12 doi:10.1097/AJP.0b013e318164d2cc.  
13  
14 64. ICMJE. International Committee of Medical Journal Editors. 2017.  
15 Available: [http://www.icmje.org/recommendations/browse/roles-and-](http://www.icmje.org/recommendations/browse/roles-and-responsibilities/defining-the-role-of-authors-and-contributors.html)  
16 [responsibilities/defining-the-role-of-authors-and-contributors.html](http://www.icmje.org/recommendations/browse/roles-and-responsibilities/defining-the-role-of-authors-and-contributors.html) [Accessed 03 Aug  
17 2021].  
18  
19  
20  
21  
22  
23  
24  
25  
26  
27  
28  
29  
30  
31  
32  
33  
34  
35  
36  
37  
38  
39  
40  
41  
42  
43  
44  
45  
46  
47  
48  
49  
50  
51  
52  
53  
54  
55  
56  
57  
58  
59  
60



1  
2  
3  
4  
5  
6  
7  
8  
9  
10  
11  
12  
13  
14  
15  
16  
17  
18  
19  
20  
21  
22  
23  
24  
25  
26  
27  
28  
29  
30  
31  
32  
33  
34  
35  
36  
37  
38  
39  
40  
41  
42  
43  
44  
45  
46  
47  
48  
49  
50  
51  
52  
53  
54  
55  
56  
57  
58  
59  
60

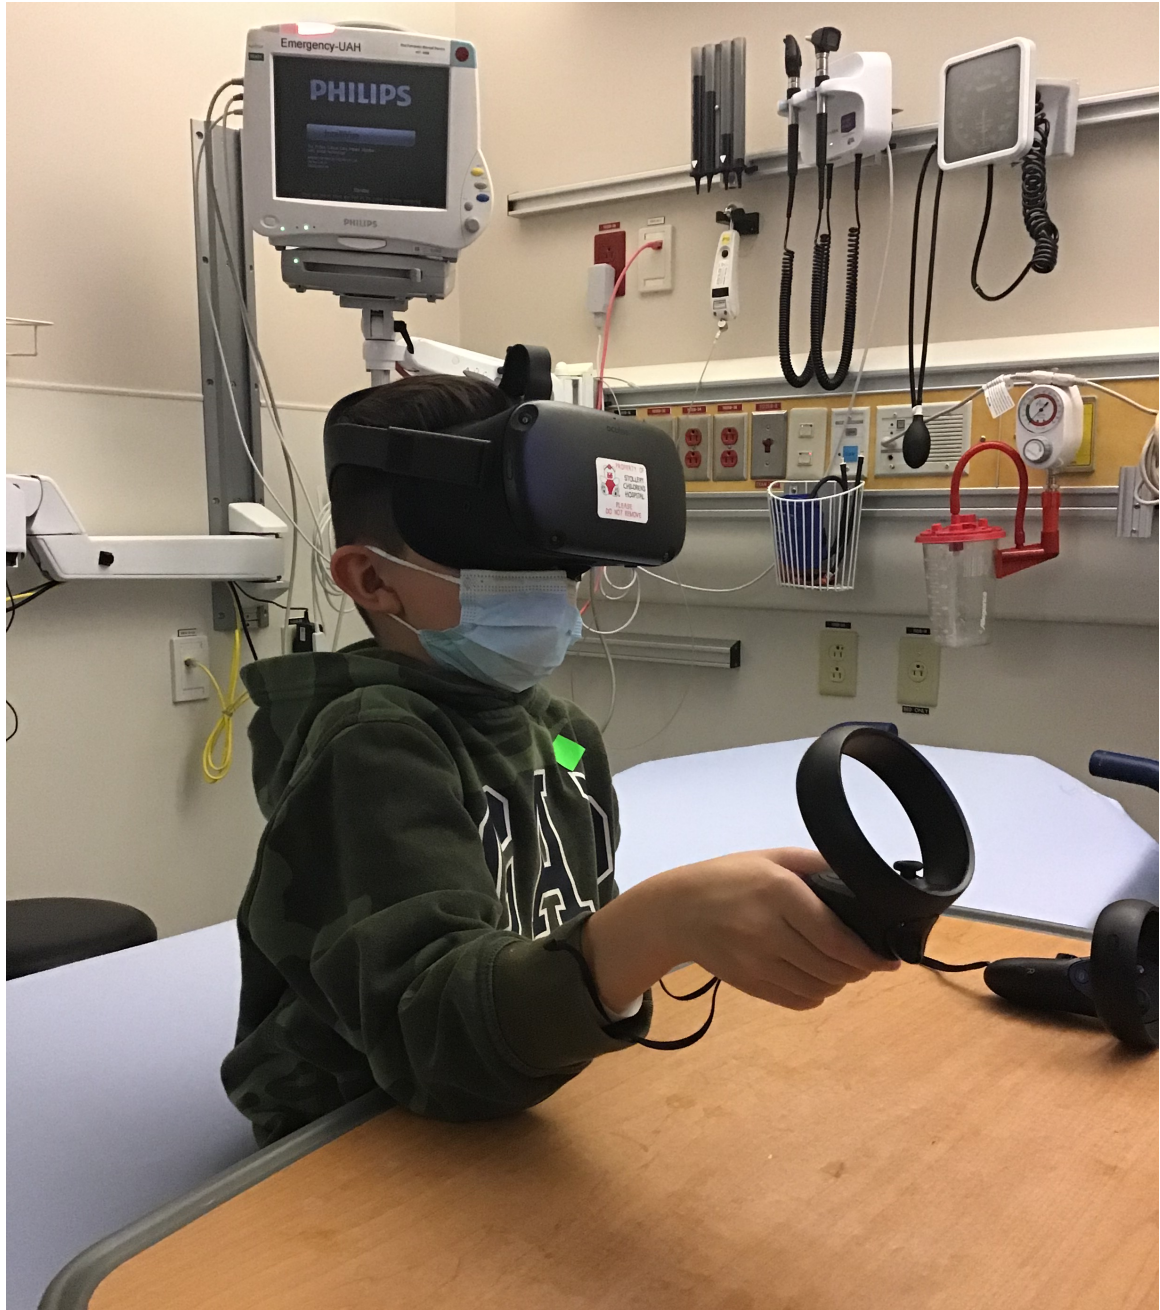

# VR Game Menu

## Easy/Novice

| Title                      | Category              | Content                                                    | Controller                                                                                                            | Comments                                                  |
|----------------------------|-----------------------|------------------------------------------------------------|-----------------------------------------------------------------------------------------------------------------------|-----------------------------------------------------------|
| <b>Henry</b>               | Immersive<br>12 min   | Henry is the story of a little hedgehog on his birthday.   | None                                                                                                                  | Fun, magical, some movement                               |
| <b>YouTube</b>             | Immersive<br>Passive  | Watch YouTube videos in VR.                                | Use the front trigger to browse and choose videos                                                                     | Some videos might not be VR<br>360 videos can be dizzying |
| <b>Myth: A Frozen Tale</b> | Immersive<br>8 min    | Watch the elemental spirits of air, fire, water and earth. | None                                                                                                                  | Some movement, Magical creatures                          |
| <b>Color Space</b>         | Interactive           | A virtual reality coloring book with sound.                | - Left controller is the paint pallet<br>- Right controller selects color                                             | Calming, relaxing<br>No movement                          |
| <b>Tilt Brush</b>          | Interactive           | Paint your own 3D world!                                   | - Left controller: art tools<br>- Left joy-stick flips through art tools<br>- Right controller selects tool and draws | Calming, relaxing<br>No movement                          |
| <b>Bonfire</b>             | Interactive<br>15 min | You've crash-landed on an alien planet and try to survive. | Front Trigger<br>Right hand joystick                                                                                  | Rated: 10+<br>Some movement, Fight a giant slug           |

\*Child can be lying down for any of these games

# VR Game Menu

## Experienced

| Title                               | Category                                                 | Content                                                                                                                                                                                                      | Controller                                                                                                                                                                                                                                                         | Comments                                                                                                                                                                 |
|-------------------------------------|----------------------------------------------------------|--------------------------------------------------------------------------------------------------------------------------------------------------------------------------------------------------------------|--------------------------------------------------------------------------------------------------------------------------------------------------------------------------------------------------------------------------------------------------------------------|--------------------------------------------------------------------------------------------------------------------------------------------------------------------------|
| <b>Jurassic World</b>               | Immersive<br>7 min (Blue)<br>3 min (Apatosarus)          | Watch Blue the dinosaur interact with other dinosaurs!<br>* Choose Blue first then Apatosaurus                                                                                                               | Front trigger to choose video.<br>Use any button to go back to main menu                                                                                                                                                                                           | Be careful, you will interact with a T-rex!<br>Can be lying down.                                                                                                        |
| <b>Tetris Effects</b>               | Interactive                                              | Tetris like you've never seen it, or heard it, or felt it before!<br>* Play Journey Mode                                                                                                                     | - L hand joy-stick moves block<br>- Right hand A or B to change orientation of the block<br>- Right hand trigger to change block option                                                                                                                            | Some movement, Lights and music.<br>Can be lying down.                                                                                                                   |
| <b>Fruit Ninja</b>                  | Interactive                                              | Slice through flying fruits!<br>* Only Arcade game can be played                                                                                                                                             | Swipe fruits with dominant hand controller.                                                                                                                                                                                                                        | Not a lot of movement, Only the flying fruits.<br>Need to be sitting up.                                                                                                 |
| <b>Moss</b>                         | Interactive<br><i>Requires knowledge of VR or gaming</i> | Action-adventure puzzle game. Help a young mouse explore a magical world.<br>*Hint: Use index trigger to drag blue glowing boxes                                                                             | Left hand joystick to move<br>Right hand A to jump<br>Right B to hit/attack<br>Right hand A&B to avoid<br>Double B to go back to menu                                                                                                                              | There will be puzzles you'll have to figure out!<br>Need to be sitting up straight.                                                                                      |
| <b>Vader Immortal I, II and III</b> | Interactive<br><i>Requires knowledge of VR or gaming</i> | Step into a galaxy far far away!<br>Episode I: hone light saber skills<br>Episode II: Learn to use the force<br>Episode III: Master the skills of the Jedi<br>*Light saber dojo in each episode is very fun! | - Joy stick to hover where to move<br>- Left joy stick when in the dojo.<br>- To use the force: press the grab trigger and hover over the object, you can move it towards you or throw/aim away<br>- Hint: check your belt you may have objects (e.g. light saber) | Need to be sitting up straight<br>Rated: Teen<br>- Star Wars graphics<br>- Fighting with the force<br>- Need to be able to sit up straight<br>- Lots of virtual movement |



CFS=Children's Fear Scale; vNRS=verbal Numerical Rating Scale; HR=Heart Rate; STAI-S= State Trait Anxiety Inventory – State Scale Revised Version; BARF=Baxter Retching Faces; OSBD-R=Observational Scale of Behavioral Distress-Revised; RA=Research Assistant  
 Note: OSBD-R coding of videos will be done by RAs post visit

**A randomized controlled trial of virtual reality-based distraction for venipuncture-related distress in children:  
The VR Study**

| REB #: Pro00095418 | Screening ID      | Enrolment Date                              |
|--------------------|-------------------|---------------------------------------------|
| PI: Dr. Samina Ali | <b>VR - _____</b> | ____ / ____ / <u>20</u> ____<br>dd mmm yyyy |

## Pre-Screening

|                                              |                                                                                                                                                                                                                                                                                                                                   |
|----------------------------------------------|-----------------------------------------------------------------------------------------------------------------------------------------------------------------------------------------------------------------------------------------------------------------------------------------------------------------------------------|
| Date and Time of Triage                      | ____ / ____ / ____<br>dd mmm yyyy<br>____ : ____<br>(24 hour clock)                                                                                                                                                                                                                                                               |
| Child's Age                                  | _____ years                                                                                                                                                                                                                                                                                                                       |
| Child's Sex                                  | <input type="checkbox"/> Female <input type="checkbox"/> Male                                                                                                                                                                                                                                                                     |
| Was the family approached for this study?    | <input type="checkbox"/> Yes <input type="checkbox"/> No                                                                                                                                                                                                                                                                          |
| <u>If NO</u> , specify reason and STOP HERE. | <input type="checkbox"/> Family refused overall consent to be approached for research<br><input type="checkbox"/> Legal guardian not present<br><input type="checkbox"/> RA busy with another study<br><input type="checkbox"/> Did not meet eligibility criteria, specify _____<br><input type="checkbox"/> Other, Specify _____ |
| <u>If YES</u> , continue to Eligibility.     |                                                                                                                                                                                                                                                                                                                                   |



A randomized controlled trial of virtual reality-based distraction for venipuncture-related distress in children:  
 The VR Study

| REB #: Pro00095418 | Screening ID | Enrolment Date               |
|--------------------|--------------|------------------------------|
| PI: Dr. Samina Ali | VR - _____   | ___/___/20___<br>dd mmm yyyy |

**Eligibility**

Was verbal consent for screening obtained from the family?  Yes  No

**Inclusion Criteria**

|                                                           |                              |                             |
|-----------------------------------------------------------|------------------------------|-----------------------------|
| 1. Child aged 6-17 years                                  | <input type="checkbox"/> Yes | <input type="checkbox"/> No |
| 2. Requires IV placement                                  | <input type="checkbox"/> Yes | <input type="checkbox"/> No |
| 3. Will receive topical anesthetic cream for IV placement | <input type="checkbox"/> Yes | <input type="checkbox"/> No |

**Exclusion Criteria**

|                                                                                                                                                                                                                                                                                                                             |                              |                             |
|-----------------------------------------------------------------------------------------------------------------------------------------------------------------------------------------------------------------------------------------------------------------------------------------------------------------------------|------------------------------|-----------------------------|
| 1. Medically unstable (i.e. CTAS 1, requires immediate IV insertion)                                                                                                                                                                                                                                                        | <input type="checkbox"/> Yes | <input type="checkbox"/> No |
| 2. Unconscious or not fully alert                                                                                                                                                                                                                                                                                           | <input type="checkbox"/> Yes | <input type="checkbox"/> No |
| 3. Visual, auditory or cognitive or mental health issues precluding safe interaction with the VR intervention                                                                                                                                                                                                               | <input type="checkbox"/> Yes | <input type="checkbox"/> No |
| 4. Conditions that could be exacerbated by the VR environment (as reported by the family)<br>a. <i>current</i> symptomatic nausea / vomiting / dizziness / migraine<br>b. <i>history</i> of psychosis / hallucinations / epilepsy                                                                                           | <input type="checkbox"/> Yes | <input type="checkbox"/> No |
| 5. Presence of an infection / injury which could contaminate the VR intervention equipment (as determined by the healthcare team) including but not limited to<br>a. open wounds / infections of the head and neck area<br>b. suspected or confirmed methicillin-resistant <i>Staphylococcus aureus</i> (MRSA) colonization | <input type="checkbox"/> Yes | <input type="checkbox"/> No |
| 6. Screens positive for 'influenza-like illness' (ILI) as per the current SCH ED screening criteria                                                                                                                                                                                                                         | <input type="checkbox"/> Yes | <input type="checkbox"/> No |
| 7. Child or Parental language barrier precluding the ability to understand and complete study assessments, in the absence of a native language translator                                                                                                                                                                   | <input type="checkbox"/> Yes | <input type="checkbox"/> No |
| 8. Previous enrollment (of child OR parent) in this study                                                                                                                                                                                                                                                                   | <input type="checkbox"/> Yes | <input type="checkbox"/> No |

Is the family eligible for the study?  Yes  No

**A randomized controlled trial of virtual reality-based distraction for venipuncture-related distress in children:  
The VR Study**

| REB #: Pro00095418 | Screening ID      | Enrolment Date                              |
|--------------------|-------------------|---------------------------------------------|
| PI: Dr. Samina Ali | <b>VR - _____</b> | ____ / ____ / <u>20</u> ____<br>dd mmm yyyy |

## Informed Consent

Has written informed consent been obtained from the **parent/ legal guardian**?  Yes  No

### If NO,

|                               |                                                                                                                                               |
|-------------------------------|-----------------------------------------------------------------------------------------------------------------------------------------------|
| Specify reason and STOP HERE. | <input type="checkbox"/> Declined consent<br><input type="checkbox"/> Declined assent<br><input type="checkbox"/> Other, please specify _____ |
|-------------------------------|-----------------------------------------------------------------------------------------------------------------------------------------------|

### If YES,

|                                                                                                                                                                                                                                                                                                                                                          |                                                                                                                                                                                                                |
|----------------------------------------------------------------------------------------------------------------------------------------------------------------------------------------------------------------------------------------------------------------------------------------------------------------------------------------------------------|----------------------------------------------------------------------------------------------------------------------------------------------------------------------------------------------------------------|
| Specify the date and time of Informed Consent:                                                                                                                                                                                                                                                                                                           | ____ / ____ / ____<br>dd mmm yyyy<br>____ : ____<br>(24 hour clock)                                                                                                                                            |
| Has a copy of the signed informed consent been given to the family?                                                                                                                                                                                                                                                                                      | <input type="checkbox"/> Yes<br><input type="checkbox"/> No; specify: _____                                                                                                                                    |
| Has written assent been obtained from the <b>child</b> ?                                                                                                                                                                                                                                                                                                 | <input type="checkbox"/> Yes<br><input type="checkbox"/> No; specify: _____<br><input type="checkbox"/> No, but verbal assent was obtained and documented<br><input type="checkbox"/> Not required; child < 7y |
| Has a copy of the signed assent been given to the family?                                                                                                                                                                                                                                                                                                | <input type="checkbox"/> Yes<br><input type="checkbox"/> No; specify: _____                                                                                                                                    |
| Has written informed consent been provided by the <b>clinical nurse</b> ?<br><i>Note: Consent only needs to be provided by the clinical nurse once for the entire duration of the study (for all 80-90 participants). If consent has not been previously completed with the clinical nurse, make sure a signed copy is completed before recruitment.</i> | <input type="checkbox"/> Yes<br><input type="checkbox"/> No; specify: _____                                                                                                                                    |
| Clinical Nurse Study ID Number:                                                                                                                                                                                                                                                                                                                          | _____                                                                                                                                                                                                          |

A randomized controlled trial of virtual reality-based distraction for venipuncture-related distress in children:  
The VR Study

| REB #: Pro00095418 | Screening ID | Enrolment Date                      |
|--------------------|--------------|-------------------------------------|
| PI: Dr. Samina Ali | VR - _____   | ____ / ____ / 20____<br>dd mmm yyyy |

### Randomization

If the child satisfies the inclusion/ exclusion criteria and written informed consent has been provided, please RANDOMIZE the participant by clicking on the Randomize button below:

|           |                                          |
|-----------|------------------------------------------|
| Study Arm | <input type="checkbox"/> VR Intervention |
|           | <input type="checkbox"/> Standard Care   |

For peer review only

**A randomized controlled trial of virtual reality-based distraction for venipuncture-related distress in children:  
The VR Study**

| REB #: Pro00095418 | Screening ID      | Enrolment Date                           |
|--------------------|-------------------|------------------------------------------|
| PI: Dr. Samina Ali | <b>VR - _____</b> | ___ / ___ / <u>20</u> ___<br>dd mmm yyyy |

## Demographics & History

### Demographics

|                                                               |                                                                                                                                                                                                                                                                                                                               |
|---------------------------------------------------------------|-------------------------------------------------------------------------------------------------------------------------------------------------------------------------------------------------------------------------------------------------------------------------------------------------------------------------------|
| Parent/ Caregiver relationship to child                       | <input type="checkbox"/> Mother<br><input type="checkbox"/> Father<br><input type="checkbox"/> Other; specify: _____                                                                                                                                                                                                          |
| Parent / Caregiver Age                                        | ___ years; or <input type="checkbox"/> Prefer not to answer                                                                                                                                                                                                                                                                   |
| Parent / Caregiver Sex                                        | <input type="checkbox"/> Female<br><input type="checkbox"/> Male                                                                                                                                                                                                                                                              |
| Parent / Caregiver Highest level of Education                 | <input type="checkbox"/> Elementary School<br><input type="checkbox"/> High School or some High School<br><input type="checkbox"/> Diploma/ Certificate<br><input type="checkbox"/> Some Post-Secondary/ University<br><input type="checkbox"/> University/ Professional Degree<br><input type="checkbox"/> Decline to answer |
| First three digits of postal code                             | ___ (1 <sup>st</sup> 3 digits ONLY)                                                                                                                                                                                                                                                                                           |
| Do you identify your child as a member of an ethnic minority? | <input type="checkbox"/> Yes<br><input type="checkbox"/> No                                                                                                                                                                                                                                                                   |

### Medical History

|                                                                                                       |                                                             |
|-------------------------------------------------------------------------------------------------------|-------------------------------------------------------------|
| Was your child born prematurely?                                                                      | <input type="checkbox"/> Yes<br><input type="checkbox"/> No |
| <ul style="list-style-type: none"> <li>If yes, at how many weeks gestation?</li> </ul>                | ___ weeks                                                   |
| Has your child ever been to the Emergency Department before today?                                    | <input type="checkbox"/> Yes<br><input type="checkbox"/> No |
| <ul style="list-style-type: none"> <li>If yes, how many times:</li> </ul>                             | ___ times                                                   |
| Has your child ever been hospitalized?                                                                | <input type="checkbox"/> Yes<br><input type="checkbox"/> No |
| <ul style="list-style-type: none"> <li>If yes, how many times:</li> </ul>                             | ___ times                                                   |
| Has your child ever had a needle poke in their vein to draw blood or put in an intravenous (IV) line? | <input type="checkbox"/> Yes<br><input type="checkbox"/> No |

**A randomized controlled trial of virtual reality-based distraction for venipuncture-related distress in children:  
 The VR Study**

|                           |                     |                                             |
|---------------------------|---------------------|---------------------------------------------|
| <b>REB #: Pro00095418</b> | <b>Screening ID</b> | <b>Enrolment Date</b>                       |
| <b>PI: Dr. Samina Ali</b> | <b>VR - _____</b>   | ____ / ____ / <u>20</u> ____<br>dd mmm yyyy |

|                                                                                                                                                                                                                                                                                                        |                                                                                                                                                                                                     |
|--------------------------------------------------------------------------------------------------------------------------------------------------------------------------------------------------------------------------------------------------------------------------------------------------------|-----------------------------------------------------------------------------------------------------------------------------------------------------------------------------------------------------|
| If yes, how distressed was your child during the procedure? <i>(if more than one occurrence, ask the parent to recall the most recent event)</i> Choose a number between 1 and 5 that best describes your child's distress where 1 indicates 'no distress at all' and 5 is 'as distressed as possible' | <input type="checkbox"/> 1 (no distress at all)<br><input type="checkbox"/> 2<br><input type="checkbox"/> 3<br><input type="checkbox"/> 4<br><input type="checkbox"/> 5 (as distressed as possible) |
|--------------------------------------------------------------------------------------------------------------------------------------------------------------------------------------------------------------------------------------------------------------------------------------------------------|-----------------------------------------------------------------------------------------------------------------------------------------------------------------------------------------------------|

**Child Experience with Technology**

|                                                                                             |                                                                                                                                                                                                                                                                                                                                    |
|---------------------------------------------------------------------------------------------|------------------------------------------------------------------------------------------------------------------------------------------------------------------------------------------------------------------------------------------------------------------------------------------------------------------------------------|
| Has your child played with/ used any of the following devices before to <b>play games</b> ? | <input type="checkbox"/> iPad/ iPod/ iPhone / Tablet <i>(to play games)</i><br><input type="checkbox"/> Gaming console<br>(ex. Xbox, Nintendo, PS4, other)<br><input type="checkbox"/> Virtual Reality (VR) device<br>(ex. Oculus Quest/ Rift, Samsung Gear VR, HTC Vive, PlayStation VR, other)<br><input type="checkbox"/> Robot |
|---------------------------------------------------------------------------------------------|------------------------------------------------------------------------------------------------------------------------------------------------------------------------------------------------------------------------------------------------------------------------------------------------------------------------------------|

|                                                                                                                                                                                                        |                                                                                                                                                                                                        |                                                                                                                                                                                                        |                                                                                                                                                                                                        |
|--------------------------------------------------------------------------------------------------------------------------------------------------------------------------------------------------------|--------------------------------------------------------------------------------------------------------------------------------------------------------------------------------------------------------|--------------------------------------------------------------------------------------------------------------------------------------------------------------------------------------------------------|--------------------------------------------------------------------------------------------------------------------------------------------------------------------------------------------------------|
| If yes, how frequently?                                                                                                                                                                                |                                                                                                                                                                                                        |                                                                                                                                                                                                        |                                                                                                                                                                                                        |
| <b>iPad/ iPod/ iPhone / Tablet:</b>                                                                                                                                                                    | <b>Gaming console</b>                                                                                                                                                                                  | <b>VR device</b>                                                                                                                                                                                       | <b>Robot</b>                                                                                                                                                                                           |
| <input type="checkbox"/> _____ hours/ week<br><input type="checkbox"/> Less than Once per week<br><input type="checkbox"/> Less than 5 times in total<br><input type="checkbox"/> Other, specify _____ | <input type="checkbox"/> _____ hours/ week<br><input type="checkbox"/> Less than Once per week<br><input type="checkbox"/> Less than 5 times in total<br><input type="checkbox"/> Other, specify _____ | <input type="checkbox"/> _____ hours/ week<br><input type="checkbox"/> Less than Once per week<br><input type="checkbox"/> Less than 5 times in total<br><input type="checkbox"/> Other, specify _____ | <input type="checkbox"/> _____ hours/ week<br><input type="checkbox"/> Less than Once per week<br><input type="checkbox"/> Less than 5 times in total<br><input type="checkbox"/> Other, specify _____ |

A randomized controlled trial of virtual reality-based distraction for venipuncture-related distress in children:  
The VR Study

|                    |              |                                     |
|--------------------|--------------|-------------------------------------|
| REB #: Pro00095418 | Screening ID | Enrolment Date                      |
| PI: Dr. Samina Ali | VR - _____   | ____ / ____ / 20____<br>dd mmm yyyy |

**PRE-Procedure: Child Scores**

**NOTE:** Begin the video recorder (iPad) approximately 5 minutes before the start of the IV procedure, and stop the recording 5 minutes after the end of the procedure.

**Baseline Scores: Child**

|                                                                                                                                                                                                                                                                                                                                                                                                                                                                                                                                                                 |                                                                     |
|-----------------------------------------------------------------------------------------------------------------------------------------------------------------------------------------------------------------------------------------------------------------------------------------------------------------------------------------------------------------------------------------------------------------------------------------------------------------------------------------------------------------------------------------------------------------|---------------------------------------------------------------------|
| Heart Rate (record from Triage)                                                                                                                                                                                                                                                                                                                                                                                                                                                                                                                                 | _____ bpm                                                           |
| Time pre-procedure scores collected                                                                                                                                                                                                                                                                                                                                                                                                                                                                                                                             | ____ / ____ / ____<br>dd mmm yyyy<br>____ : ____<br>(24 hour clock) |
| Pain Score: verbal Numerical Rating Scale (vNRS)<br>"On a scale of 0 to 10, where 0 is no pain and 10 is the worst pain you can imagine, what is your pain level now?"                                                                                                                                                                                                                                                                                                                                                                                          | _____ / 10                                                          |
| Distress Score: Numerical Rating Scale<br>"On a scale of 0 to 10, where 0 is no distress and 10 is the most distress you can imagine having, what is your distress level now?"                                                                                                                                                                                                                                                                                                                                                                                  | _____ / 10                                                          |
| <p>Fear Score: Children's Fear Scale (CFS)<br/>"These faces are showing different amounts of being scared. This face [point to the left-most face] is not scared at all, this face is a little bit more scared [point to the second face from left], a bit more scared [sweep finger along scale], right up to the most scared possible [point to the last face on the right]. Have a look at these faces and choose the one that shows how scared you are right now."</p> 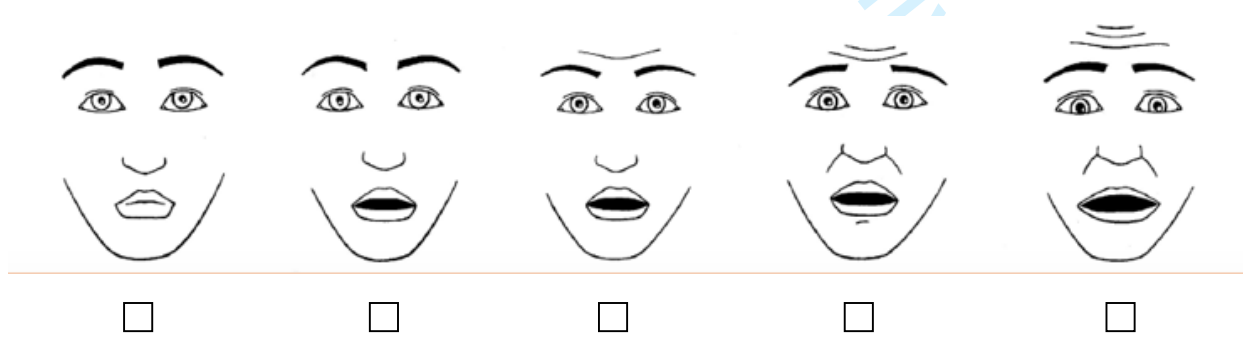 |                                                                     |

A randomized controlled trial of virtual reality-based distraction for venipuncture-related distress in children:  
 The VR Study

| REB #: Pro00095418 | Screening ID | Enrolment Date                      |
|--------------------|--------------|-------------------------------------|
| PI: Dr. Samina Ali | VR - _____   | ____ / ____ / 20____<br>dd mmm yyyy |

**PRE-Procedure: Parent / Caregiver STAI Questionnaire**

We would ask that you complete the following questions as they relate to your feelings about your child’s upcoming IV procedure, today. A number of statements which people have used to describe themselves are given below. Read each statement and then circle the appropriate number to indicate how you feel **right now**, that is, **at this moment**. There are no right or wrong answers. Do not spend too much time on any one statement but give the answer which seems to describe your feelings best.

1-----2-----3-----4  
 Not at all      Somewhat      Moderately so      Very much so

1. I feel calm..... 1 2 3 4
2. I feel secure..... 1 2 3 4
3. I am tense..... 1 2 3 4
4. I feel strained..... 1 2 3 4
5. I feel at ease..... 1 2 3 4
6. I feel upset..... 1 2 3 4
7. I am presently worrying over possible misfortunes..... 1 2 3 4
8. I feel satisfied..... 1 2 3 4
9. I feel frightened..... 1 2 3 4
10. I feel comfortable..... 1 2 3 4
11. I feel self-confident..... 1 2 3 4
12. I feel nervous..... 1 2 3 4
13. I am jittery..... 1 2 3 4
14. I feel indecisive..... 1 2 3 4
15. I am relaxed..... 1 2 3 4
16. I feel content..... 1 2 3 4
17. I am worried..... 1 2 3 4
18. I feel confused..... 1 2 3 4
19. I feel steady..... 1 2 3 4
20. I feel pleasant..... 1 2 3 4



**A randomized controlled trial of virtual reality-based distraction for venipuncture-related distress in children:  
The VR Study**

| REB #: Pro00095418 | Screening ID      | Enrolment Date                  |
|--------------------|-------------------|---------------------------------|
| PI: Dr. Samina Ali | <b>VR - _____</b> | ____/____/20____<br>dd mmm yyyy |

### DURING-Procedure

- Start the iPad video recording approximately 5 minutes prior to the start of the procedure.
- For children randomized to the VR group: Immediately after PRE-procedure scores and STAI are completed, research assistant will set up the VR equipment.
- The staff ED nurse will then begin the IV set-up

|                                                                                                                                                                                                                                                                                                   |                                                                                                                                                                                                                                                          |
|---------------------------------------------------------------------------------------------------------------------------------------------------------------------------------------------------------------------------------------------------------------------------------------------------|----------------------------------------------------------------------------------------------------------------------------------------------------------------------------------------------------------------------------------------------------------|
| <b>Start time of IV procedure:</b><br><i>(Defined as the time the staff nurse begins to clean the IV site)</i>                                                                                                                                                                                    | ____/____/____<br>dd mmm yyyy<br>:____<br>(24 hour clock)                                                                                                                                                                                                |
| <b>End time of IV procedure/ attempt:</b><br><i>(Defined as the last point of contact by the staff nurse (ex. taping cannula in place with or without arm board, wrapping arm with gauze and taping the gauze in place))</i>                                                                      | ____/____/____<br>dd mmm yyyy<br>:____<br>(24 hour clock)                                                                                                                                                                                                |
| <b>Position of Child during IV attempt:</b>                                                                                                                                                                                                                                                       | <input type="checkbox"/> Sitting up <input type="checkbox"/> Lying down (supine)                                                                                                                                                                         |
| <b>Location of first IV attempt:</b>                                                                                                                                                                                                                                                              | <input type="checkbox"/> Antecubital Fossa – RIGHT<br><input type="checkbox"/> Antecubital Fossa – RIGHT<br><input type="checkbox"/> Dorsum hand – RIGHT<br><input type="checkbox"/> Dorsum hand – LEFT<br><input type="checkbox"/> Other, specify _____ |
| <b>Was the first IV placement attempt successful?</b>                                                                                                                                                                                                                                             | <input type="checkbox"/> Yes <input type="checkbox"/> No                                                                                                                                                                                                 |
| • If NO, how many attempts, in total, were made for the IV during this ‘episode’?                                                                                                                                                                                                                 | _____ attempts                                                                                                                                                                                                                                           |
| • Was an IV successfully placed during this ‘episode’?                                                                                                                                                                                                                                            | <input type="checkbox"/> Yes <input type="checkbox"/> No                                                                                                                                                                                                 |
| <b>Any adverse events or side effects?</b><br><i>Do not suggest any AEs to the participant; Instead, ask more general questions such as "how are you feeling?" or "are you having any side effects?" or "are you feeling any different than before?", and let the child answer spontaneously.</i> | <input type="checkbox"/> Yes <input type="checkbox"/> No<br><br>If <b>“YES”</b> , complete a separate entry for each AE on the AE Form                                                                                                                   |

A randomized controlled trial of virtual reality-based distraction for venipuncture-related distress in children:  
 The VR Study

| REB #: Pro00095418 | Screening ID | Enrolment Date                   |
|--------------------|--------------|----------------------------------|
| PI: Dr. Samina Ali | VR - _____   | ___ / ___ / 20___<br>dd mmm yyyy |

**IMMEDIATELY POST-Procedure: Child Scores**

**NOTE:** Post-procedure scores/ questionnaires should be collected as soon as possible after the procedure is complete:

**Post-procedure Scores: Child**

|                                                                                                                                                                                                                                                                                                                                                                                                                                                                                                                                                    |                                                                                      |
|----------------------------------------------------------------------------------------------------------------------------------------------------------------------------------------------------------------------------------------------------------------------------------------------------------------------------------------------------------------------------------------------------------------------------------------------------------------------------------------------------------------------------------------------------|--------------------------------------------------------------------------------------|
| Time post-procedure scores collected                                                                                                                                                                                                                                                                                                                                                                                                                                                                                                               | ___ / ___ / ___<br>dd mmm yyyy<br>: _____<br>(24 hour clock)                         |
| Pain Score: verbal Numerical Rating Scale (vNRS) - Procedure<br>"On a scale of 0 to 10, where 0 is no pain and 10 is the worst pain you can imagine, what was your pain level <u>during the needle / IV poke?</u> "                                                                                                                                                                                                                                                                                                                                | ___ / 10                                                                             |
| Distress Score: Numerical Rating Scale - Procedure<br>"On a scale of 0 to 10, where 0 is no distress and 10 is the most distress you can imagine having, what was your distress level <u>during the needle / IV poke?</u> "                                                                                                                                                                                                                                                                                                                        | ___ / 10                                                                             |
| Fear Score: Children's Fear Scale (CFS) - Procedure<br>"These faces are showing different amounts of being scared. This face [point to the left-most face] is not scared at all, this face is a little bit more scared [point to the second face from left], a bit more scared [sweep finger along scale], right up to the most scared possible [point to the last face on the right]. Have a look at these faces and choose the one that shows how scared you were <u>during the needle / IV poke.</u> "                                          |  |
| Nausea Score: Baxter Retching Faces (BARF) Scale - Procedure<br>"Have you thrown up or felt like you were going to throw up before? How did your tummy feel then? We call that feeling of being sick to the stomach nausea. These faces show children who feel no nausea at all, who feel a little bit nauseated, who feel even more nauseated, and these are children who have the most nausea it is possible to feel." [Point to each face at the appropriate time.] "Which face is more like how you felt <u>during the needle / IV poke?</u> " |                                                                                      |

A randomized controlled trial of virtual reality-based distraction for venipuncture-related distress in children:  
The VR Study

|                    |              |                                  |
|--------------------|--------------|----------------------------------|
| REB #: Pro00095418 | Screening ID | Enrolment Date                   |
| PI: Dr. Samina Ali | VR - _____   | ___ / ___ / 20___<br>dd mmm yyyy |

|                                                                                                                                                       |                                                                                                                                                                                    |
|-------------------------------------------------------------------------------------------------------------------------------------------------------|------------------------------------------------------------------------------------------------------------------------------------------------------------------------------------|
|                                                                                                                                                       |                                                                                                                                                                                    |
| <input type="checkbox"/> <input type="checkbox"/> <input type="checkbox"/> <input type="checkbox"/> <input type="checkbox"/> <input type="checkbox"/> |                                                                                                                                                                                    |
| Overall, how happy were you with the IV start today, on a scale of 1 to 5, where 1 means "Not at all happy" and 5 means "Very happy"?                 | <input type="checkbox"/> 1 "Not at all happy"<br><input type="checkbox"/> 2<br><input type="checkbox"/> 3<br><input type="checkbox"/> 4<br><input type="checkbox"/> 5 "Very happy" |
| On a scale of 1 to 5, where 1 means "Not at all happy" and 5 means "Very happy", how happy were you with the pain treatment for your IV start?        | <input type="checkbox"/> 1 "Not at all happy"<br><input type="checkbox"/> 2<br><input type="checkbox"/> 3<br><input type="checkbox"/> 4<br><input type="checkbox"/> 5 "Very happy" |
| Did the [distraction / toys / VR goggles] help you today?                                                                                             | <input type="checkbox"/> Yes, it helped<br><input type="checkbox"/> No, it didn't help<br><input type="checkbox"/> I'm not sure                                                    |
| If you ever had to get an IV or needle poke again, would you want to use the same [distraction / toys / VR goggles] again?                            | <input type="checkbox"/> Yes, I would<br><input type="checkbox"/> No, I wouldn't<br><input type="checkbox"/> I'm not sure                                                          |
| Can you tell me why/ why not?                                                                                                                         |                                                                                                                                                                                    |

As soon as possible after completion of procedure, research assistant to give:  
 1. Post-Procedure Parent STAI and Satisfaction Questionnaire to parent/ caregiver  
 2. Nurse Satisfaction Questionnaire to staff ED nurse

A randomized controlled trial of virtual reality-based distraction for venipuncture-related distress in children:  
 The VR Study

| REB #: Pro00095418 | Screening ID | Enrolment Date                      |
|--------------------|--------------|-------------------------------------|
| PI: Dr. Samina Ali | VR - _____   | ____ / ____ / 20____<br>dd mmm yyyy |

**POST-Procedure: Parent / Caregiver STAI Questionnaire**

We would ask that you complete the following questions as they relate to your feelings about your child’s IV procedure that just happened. A number of statements which people have used to describe themselves are given below. Read each statement and then circle the appropriate number to indicate how you feel **right now**, that is, **at this moment**. There are no right or wrong answers. Do not spend too much time on any one statement but give the answer which seems to describe your feelings best.

1-----2-----3-----4  
 Not at all      Somewhat      Moderately so      Very much so

1. I feel calm..... 1 2 3 4
2. I feel secure..... 1 2 3 4
3. I am tense..... 1 2 3 4
4. I feel strained..... 1 2 3 4
5. I feel at ease..... 1 2 3 4
6. I feel upset..... 1 2 3 4
7. I am presently worrying over possible misfortunes..... 1 2 3 4
8. I feel satisfied..... 1 2 3 4
9. I feel frightened..... 1 2 3 4
10. I feel comfortable..... 1 2 3 4
11. I feel self-confident..... 1 2 3 4
12. I feel nervous..... 1 2 3 4
13. I am jittery..... 1 2 3 4
14. I feel indecisive..... 1 2 3 4
15. I am relaxed..... 1 2 3 4
16. I feel content..... 1 2 3 4
17. I am worried..... 1 2 3 4
18. I feel confused..... 1 2 3 4
19. I feel steady..... 1 2 3 4
20. I feel pleasant..... 1 2 3 4

**A randomized controlled trial of virtual reality-based distraction for venipuncture-related distress in children:  
The VR Study**

|                           |                     |                                 |
|---------------------------|---------------------|---------------------------------|
| <b>REB #: Pro00095418</b> | <b>Screening ID</b> | <b>Enrolment Date</b>           |
| <b>PI: Dr. Samina Ali</b> | <b>VR - _____</b>   | ____/____/20____<br>dd mmm yyyy |

## POST-Procedure: Caregiver Satisfaction Questionnaire

**1) Please rate your overall satisfaction with your child's IV start:**

|                              |                          |                          |                          |                           |
|------------------------------|--------------------------|--------------------------|--------------------------|---------------------------|
| <i>Very<br/>Dissatisfied</i> | <i>Dissatisfied</i>      | <i>Neutral</i>           | <i>Satisfied</i>         | <i>Very<br/>Satisfied</i> |
| <b>1</b>                     | <b>2</b>                 | <b>3</b>                 | <b>4</b>                 | <b>5</b>                  |
| <input type="checkbox"/>     | <input type="checkbox"/> | <input type="checkbox"/> | <input type="checkbox"/> | <input type="checkbox"/>  |

Please Explain: \_\_\_\_\_

\_\_\_\_\_

\_\_\_\_\_

**2) Please rate your satisfaction with the management of your child's pain for their IV start:**

|                              |                          |                          |                          |                           |
|------------------------------|--------------------------|--------------------------|--------------------------|---------------------------|
| <i>Very<br/>Dissatisfied</i> | <i>Dissatisfied</i>      | <i>Neutral</i>           | <i>Satisfied</i>         | <i>Very<br/>Satisfied</i> |
| <b>1</b>                     | <b>2</b>                 | <b>3</b>                 | <b>4</b>                 | <b>5</b>                  |
| <input type="checkbox"/>     | <input type="checkbox"/> | <input type="checkbox"/> | <input type="checkbox"/> | <input type="checkbox"/>  |

Please Explain: \_\_\_\_\_

\_\_\_\_\_

\_\_\_\_\_

**3) Would you use the same methods to manage your child's pain from needle pokes in the future?**

Yes

No

Why / Why not? \_\_\_\_\_

\_\_\_\_\_

\_\_\_\_\_

**Thank you for your participation in our research study,  
it is very much appreciated!**

A randomized controlled trial of virtual reality-based distraction for venipuncture-related distress in children:  
 The VR Study

|                    |              |                                     |
|--------------------|--------------|-------------------------------------|
| REB #: Pro00095418 | Screening ID | Enrolment Date                      |
| PI: Dr. Samina Ali | VR - _____   | ____ / ____ / 20____<br>dd mmm yyyy |

**Nurse Satisfaction Questionnaire (VR Group)**

1) Overall, how easy or difficult was it to perform the IV insertion for this child?

|                          |                          |                          |                          |                          |
|--------------------------|--------------------------|--------------------------|--------------------------|--------------------------|
| <i>Very Easy</i>         | <i>Easy</i>              | <i>Neutral</i>           | <i>Difficult</i>         | <i>Very Difficult</i>    |
| <b>1</b>                 | <b>2</b>                 | <b>3</b>                 | <b>4</b>                 | <b>5</b>                 |
| <input type="checkbox"/> |

2) Please rate your satisfaction with this child's IV start:

|                          |                          |                          |                          |                          |
|--------------------------|--------------------------|--------------------------|--------------------------|--------------------------|
| <i>Very Dissatisfied</i> | <i>Dissatisfied</i>      | <i>Neutral</i>           | <i>Satisfied</i>         | <i>Very Satisfied</i>    |
| <b>1</b>                 | <b>2</b>                 | <b>3</b>                 | <b>4</b>                 | <b>5</b>                 |
| <input type="checkbox"/> |

3) Would you use the same methods (ie. VR device) to manage another child's pain and distress from IV insertion in the future?

Yes  
 No

4) Could you please rate the following on a scale of 1-5, where 1= Not at all and 5=Very much

|                                                                                                    |                          |                          |                          |                          |                          |
|----------------------------------------------------------------------------------------------------|--------------------------|--------------------------|--------------------------|--------------------------|--------------------------|
|                                                                                                    | <b>1</b>                 | <b>2</b>                 | <b>3</b>                 | <b>4</b>                 | <b>5</b>                 |
| Your overall satisfaction with the Virtual Reality (VR) device today                               | <input type="checkbox"/> |
| Your willingness to use the VR device to manage another child's IV pain and distress in the future | <input type="checkbox"/> |
| The degree to which the VR device improved the child's experience                                  | <input type="checkbox"/> |
| The degree to which the VR <b>improved</b> your ability to insert the IV                           | <input type="checkbox"/> |
| The degree to which the VR <b>disrupted</b> your ability to insert the IV                          | <input type="checkbox"/> |

5) Did the VR device that was used during the procedure increase the time required to insert the IV?

Yes (approximately how much time did it increase the procedure by? \_\_\_\_\_ minutes)  
 No

6) Is there anything else that you would like to tell us, today, about your experience inserting an IV for a child using a VR device?

**A randomized controlled trial of virtual reality-based distraction for venipuncture-related distress in children:  
The VR Study**

| REB #: Pro00095418 | Screening ID | Enrolment Date                      |
|--------------------|--------------|-------------------------------------|
| PI: Dr. Samina Ali | VR - _____   | ____ / ____ / 20____<br>dd mmm yyyy |

7) How many years of practice do you have as a nurse (all settings)? \_\_\_\_\_  N/A

8) How many years of practice do you have as a nurse in the ED? \_\_\_\_\_  N/A

9) Please indicate the amount of time spent in the pediatric emergency department (PED):

- 0-25% of my time is spent in the pediatric ED
- 26-50% of my time is spent in the pediatric ED
- 51-75% of my time is spent in the pediatric ED
- 76-100% of my time is spent in the pediatric ED

10) Please specify your position if other than attending ED nurse (e.g., IV nurse, attending ED physician, resident, physician or nurse from other service [specify], etc):

\_\_\_\_\_

**Thank You!!**



A randomized controlled trial of virtual reality-based distraction for venipuncture-related distress in children:  
 The VR Study

|                    |              |                                     |
|--------------------|--------------|-------------------------------------|
| REB #: Pro00095418 | Screening ID | Enrolment Date                      |
| PI: Dr. Samina Ali | VR - _____   | ____ / ____ / 20____<br>dd mmm yyyy |

**Nurse Satisfaction Questionnaire (Standard Care Group)**

1) Overall, how easy or difficult was it to perform the IV insertion for this child?

|                          |                          |                          |                          |                          |
|--------------------------|--------------------------|--------------------------|--------------------------|--------------------------|
| <i>Very Easy</i>         | <i>Easy</i>              | <i>Neutral</i>           | <i>Difficult</i>         | <i>Very Difficult</i>    |
| <b>1</b>                 | <b>2</b>                 | <b>3</b>                 | <b>4</b>                 | <b>5</b>                 |
| <input type="checkbox"/> |

2) Please rate your satisfaction with this child's IV start:

|                          |                          |                          |                          |                          |
|--------------------------|--------------------------|--------------------------|--------------------------|--------------------------|
| <i>Very Dissatisfied</i> | <i>Dissatisfied</i>      | <i>Neutral</i>           | <i>Satisfied</i>         | <i>Very Satisfied</i>    |
| <b>1</b>                 | <b>2</b>                 | <b>3</b>                 | <b>4</b>                 | <b>5</b>                 |
| <input type="checkbox"/> |

3) Would you use the same methods (ie. Standard of Care pain management plan) to manage another child's pain and distress from IV insertion in the future?

Yes  
 No

4) Could you please rate the following on a scale of 1-5, where 1= Not at all and 5=Very much

|                                                                                                                     | 1                        | 2                        | 3                        | 4                        | 5                        |
|---------------------------------------------------------------------------------------------------------------------|--------------------------|--------------------------|--------------------------|--------------------------|--------------------------|
| Your overall satisfaction with the pain management plan today                                                       | <input type="checkbox"/> |
| Your willingness to use a similar pain management plan to manage another child's IV pain and distress in the future | <input type="checkbox"/> |
| The degree to which the pain management plan improved the child's experience                                        | <input type="checkbox"/> |
| The degree to which the pain management plan <b>improved</b> your ability to insert the IV                          | <input type="checkbox"/> |
| The degree to which the pain management plan <b>disrupted</b> your ability to insert the IV                         | <input type="checkbox"/> |

5) Did the Standard of Care pain management plan that was used during the procedure increase the time required to insert the IV?

Yes (approximately how much time did it increase the procedure by? \_\_\_\_\_ minutes)  
 No

6) Is there anything else that you would like to tell us, today, about your experience inserting an IV for a child using a Standard of Care pain management plan?

**A randomized controlled trial of virtual reality-based distraction for venipuncture-related distress in children:  
The VR Study**

| REB #: Pro00095418 | Screening ID | Enrolment Date                      |
|--------------------|--------------|-------------------------------------|
| PI: Dr. Samina Ali | VR - _____   | ____ / ____ / 20____<br>dd mmm yyyy |

7) How many years of practice do you have as a nurse (all settings)? \_\_\_\_\_  N/A

8) How many years of practice do you have as a nurse in the ED? \_\_\_\_\_  N/A

9) Please indicate the amount of time spent in the pediatric emergency department (PED):

- 0-25% of my time is spent in the pediatric ED
- 26-50% of my time is spent in the pediatric ED
- 51-75% of my time is spent in the pediatric ED
- 76-100% of my time is spent in the pediatric ED

10) Please specify your position if other than attending ED nurse (e.g., IV nurse, attending ED physician, resident, physician or nurse from other service [specify], etc):

\_\_\_\_\_

**Thank You!!**

A randomized controlled trial of virtual reality-based distraction for venipuncture-related distress in children:  
 The VR Study

| REB #: Pro00095418 | Screening ID | Enrolment Date                      |
|--------------------|--------------|-------------------------------------|
| PI: Dr. Samina Ali | VR - _____   | ____ / ____ / 20____<br>dd mmm yyyy |

## Discharge Information

|                                          |                                                                                                                        |
|------------------------------------------|------------------------------------------------------------------------------------------------------------------------|
| Disposition                              | <input type="checkbox"/> Discharged Home<br><input type="checkbox"/> Admitted<br><input type="checkbox"/> Other, _____ |
| Date & Time of Discharge from the ED     | ____ / ____ / ____<br>dd mmm yyyy<br>____ : ____<br>(24 hour clock)                                                    |
| Length of Stay in ED (calculated field): | ____ hours                                                                                                             |
| Discharge Diagnosis                      |                                                                                                                        |

**A randomized controlled trial of virtual reality-based distraction for venipuncture-related distress in children:  
The VR Study**

|                           |                     |                                             |
|---------------------------|---------------------|---------------------------------------------|
| <b>REB #: Pro00095418</b> | <b>Screening ID</b> | <b>Enrolment Date</b>                       |
| <b>PI: Dr. Samina Ali</b> | <b>VR - _____</b>   | ____ / ____ / <u>20</u> ____<br>dd mmm yyyy |

**RA Satisfaction Questionnaire** (For Standard Care group, answer Q6 ONLY)

1) Could you please rate the following on a scale of 1-5, where 1= Not at all and 5=Very much

|                                                                           | <b>1</b>                 | <b>2</b>                 | <b>3</b>                 | <b>4</b>                 | <b>5</b>                 |
|---------------------------------------------------------------------------|--------------------------|--------------------------|--------------------------|--------------------------|--------------------------|
| Your overall satisfaction with the Virtual Reality (VR) device today      | <input type="checkbox"/> |
| Ease of set-up of the VR device                                           | <input type="checkbox"/> |
| Your satisfaction with the amount of time it took to set up the VR device | <input type="checkbox"/> |
| Your desire to work with the VR device again                              | <input type="checkbox"/> |

2) Approximately how much time was needed to set up the VR device with the child, today?  
(excluding consent and questionnaire time)

\_\_\_\_\_ minutes

3) What components of the VR device did the child use during the IV procedure? (check all that apply)

- VR Goggles / Headset
- Controller
- Headphones

4) Were the VR Goggles / Headset kept on for the entire duration of the procedure?

- Yes
- No

5) What applications / game(s) did the child play during the procedure?

6) What pain management or distraction tools / resources were used during the procedure?

(Check all that apply. If a CLS was involved, ask them to clarify which tools were used.)

- |                                                     |                                                        |
|-----------------------------------------------------|--------------------------------------------------------|
| <input type="checkbox"/> Virtual Reality            | <input type="checkbox"/> Child Life Specialist (CLS)   |
| <input type="checkbox"/> iPad / Tablet / Smartphone | <input type="checkbox"/> Other; specify: _____         |
| <input type="checkbox"/> Toys                       | <input type="checkbox"/> No other techniques were used |
| <input type="checkbox"/> Music                      |                                                        |

7) Did you have any technical or other issues with operating / handing the VR equipment?

- Yes; specify: \_\_\_\_\_
- No

8) Is there anything else that you would like to tell us about your experience with the VR goggles today?

A randomized controlled trial of virtual reality-based distraction for venipuncture-related distress in children:  
 The VR Study

|                    |                         |                                     |
|--------------------|-------------------------|-------------------------------------|
| REB #: Pro00095418 | Screening ID            | Enrolment Date                      |
| PI: Dr. Samina Ali | VR - ____ - ____ - ____ | ____ / ____ / 20____<br>dd mmm yyyy |

**Adverse Events Log**

| To be filled out by Research Assistant |                              |                                             |                                                                                                                                |                                                                                                                          |                                                | To be filled out by Site Investigator                   |                       |                                                                                                   |               |                 |
|----------------------------------------|------------------------------|---------------------------------------------|--------------------------------------------------------------------------------------------------------------------------------|--------------------------------------------------------------------------------------------------------------------------|------------------------------------------------|---------------------------------------------------------|-----------------------|---------------------------------------------------------------------------------------------------|---------------|-----------------|
| No.                                    | Description of Adverse Event | Onset Date & Time<br>(dd/mmm/yyyy<br>HH:MM) | Action Taken<br>1. None<br>2. Medication<br>3. New or Prolonged Hospitalization<br>4. Procedure / Surgery<br>5. Other, specify | Outcome<br>1. Resolved<br>2. Resolved with Sequelae<br>3. Resolving<br>4. Unresolved<br>5. Fatal<br>6. Lost to follow-up | Date & Time Resolved<br>(dd/mmm/yyyy<br>HH:MM) | Intensity grade:<br>1. Mild<br>2. Moderate<br>3. Severe | Expected AE?<br>Y / N | Relationship to Study<br>1. Unrelated<br>2. Unlikely<br>3. Possible<br>4. Probable<br>5. Definite | SAE?<br>Y / N | Site PI Initial |
| 1                                      |                              |                                             |                                                                                                                                |                                                                                                                          |                                                |                                                         |                       |                                                                                                   |               |                 |
| 2                                      |                              |                                             |                                                                                                                                |                                                                                                                          |                                                |                                                         |                       |                                                                                                   |               |                 |
| 3                                      |                              |                                             |                                                                                                                                |                                                                                                                          |                                                |                                                         |                       |                                                                                                   |               |                 |

**A randomized controlled trial of virtual reality-based distraction for venipuncture-related distress in children:  
The VR Study**

|                           |                     |                                               |
|---------------------------|---------------------|-----------------------------------------------|
| <b>REB #: Pro00095418</b> | <b>Screening ID</b> | <b>Enrolment Date</b>                         |
| <b>PI: Dr. Samina Ali</b> | <b>VR - _____</b>   | ____ / ____ / 20____<br>dd      mmm      yyyy |

## Early Withdrawal

**ONLY fill out this form in the event of an early withdrawal**

|                                                                                                                               |                                                                                                                                                                                                                                                                            |
|-------------------------------------------------------------------------------------------------------------------------------|----------------------------------------------------------------------------------------------------------------------------------------------------------------------------------------------------------------------------------------------------------------------------|
| Date of Discontinuation:                                                                                                      | ____ / ____ / ____<br>dd      mmm      yyyy                                                                                                                                                                                                                                |
| Reasons for Discontinuation:<br>(check all that apply)                                                                        | <input type="checkbox"/> Adverse Event / Serious Adverse Event<br><input type="checkbox"/> Death<br><input type="checkbox"/> Withdrawal of Consent / Assent<br><input type="checkbox"/> Protocol Violation, Specify _____<br><input type="checkbox"/> Other, Specify _____ |
| <b><u>If withdrew consent / assent:</u></b><br>1. Permission to use collected data?<br>2. Permission to conduct Chart Review? | <input type="checkbox"/> Yes <input type="checkbox"/> No<br><input type="checkbox"/> Yes <input type="checkbox"/> No                                                                                                                                                       |
| <u>Comments:</u><br><br><br>                                                                                                  |                                                                                                                                                                                                                                                                            |

# Reporting checklist for protocol of a clinical trial.

|                                                         |                     | Reporting Item                                                                                                                                                                                                                                                                           | Page Number   |
|---------------------------------------------------------|---------------------|------------------------------------------------------------------------------------------------------------------------------------------------------------------------------------------------------------------------------------------------------------------------------------------|---------------|
| Title                                                   | <a href="#">#1</a>  | Descriptive title identifying the study design, population, interventions, and, if applicable, trial acronym                                                                                                                                                                             | 1             |
| Trial registration                                      | <a href="#">#2a</a> | Trial identifier and registry name. If not yet registered, name of intended registry                                                                                                                                                                                                     | 1             |
| Trial registration: data set                            | <a href="#">#2b</a> | All items from the World Health Organization Trial Registration Data Set                                                                                                                                                                                                                 | 5-7 (Table 1) |
| Protocol version                                        | <a href="#">#3</a>  | Date and version identifier                                                                                                                                                                                                                                                              | 2             |
| Funding                                                 | <a href="#">#4</a>  | Sources and types of financial, material, and other support                                                                                                                                                                                                                              | 14            |
| Roles and responsibilities: contributorship             | <a href="#">#5a</a> | Names, affiliations, and roles of protocol contributors                                                                                                                                                                                                                                  | 15            |
| Roles and responsibilities: sponsor contact information | <a href="#">#5b</a> | Name and contact information for the trial sponsor                                                                                                                                                                                                                                       | 5             |
| Roles and responsibilities: sponsor and funder          | <a href="#">#5c</a> | Role of study sponsor and funders, if any, in study design; collection, management, analysis, and interpretation of data; writing of the report; and the decision to submit the report for publication, including whether they will have ultimate authority over any of these activities | 14            |
| Roles and responsibilities: committees                  | <a href="#">#5d</a> | Composition, roles, and responsibilities of the coordinating centre, steering committee, endpoint adjudication committee, data management team, and other individuals or                                                                                                                 | N/A           |



|    |                      |                                                 |                                                       |
|----|----------------------|-------------------------------------------------|-------------------------------------------------------|
| 1  |                      | groups overseeing the trial, if applicable (see |                                                       |
| 2  |                      | Item 21a for data monitoring committee)         |                                                       |
| 3  |                      |                                                 |                                                       |
| 4  | Background and       | <a href="#">#6a</a>                             | Description of research question and justification    |
| 5  | rationale            |                                                 | for undertaking the trial, including summary of       |
| 6  |                      |                                                 | relevant studies (published and unpublished)          |
| 7  |                      |                                                 | examining benefits and harms for each                 |
| 8  |                      |                                                 | intervention                                          |
| 9  |                      |                                                 |                                                       |
| 10 |                      |                                                 |                                                       |
| 11 |                      |                                                 |                                                       |
| 12 | Background and       | <a href="#">#6b</a>                             | Explanation for choice of comparators                 |
| 13 | rationale: choice of |                                                 |                                                       |
| 14 | comparators          |                                                 |                                                       |
| 15 |                      |                                                 |                                                       |
| 16 |                      |                                                 |                                                       |
| 17 | Objectives           | <a href="#">#7</a>                              | Specific objectives or hypotheses                     |
| 18 |                      |                                                 |                                                       |
| 19 |                      |                                                 |                                                       |
| 20 | Trial design         | <a href="#">#8</a>                              | Description of trial design including type of trial   |
| 21 |                      |                                                 | (eg, parallel group, crossover, factorial, single     |
| 22 |                      |                                                 | group), allocation ratio, and framework (eg,          |
| 23 |                      |                                                 | superiority, equivalence, non-inferiority,            |
| 24 |                      |                                                 | exploratory)                                          |
| 25 |                      |                                                 |                                                       |
| 26 |                      |                                                 |                                                       |
| 27 |                      |                                                 |                                                       |
| 28 | Study setting        | <a href="#">#9</a>                              | Description of study settings (eg, community          |
| 29 |                      |                                                 | clinic, academic hospital) and list of countries      |
| 30 |                      |                                                 | where data will be collected. Reference to where      |
| 31 |                      |                                                 | list of study sites can be obtained                   |
| 32 |                      |                                                 |                                                       |
| 33 |                      |                                                 |                                                       |
| 34 |                      |                                                 |                                                       |
| 35 | Eligibility criteria | <a href="#">#10</a>                             | Inclusion and exclusion criteria for participants.    |
| 36 |                      |                                                 | If applicable, eligibility criteria for study centres |
| 37 |                      |                                                 | and individuals who will perform the                  |
| 38 |                      |                                                 | interventions (eg, surgeons, psychotherapists)        |
| 39 |                      |                                                 |                                                       |
| 40 |                      |                                                 |                                                       |
| 41 |                      |                                                 |                                                       |
| 42 | Interventions:       | <a href="#">#11a</a>                            | Interventions for each group with sufficient          |
| 43 | description          |                                                 | detail to allow replication, including how and        |
| 44 |                      |                                                 | when they will be administered                        |
| 45 |                      |                                                 |                                                       |
| 46 |                      |                                                 |                                                       |
| 47 | Interventions:       | <a href="#">#11b</a>                            | Criteria for discontinuing or modifying allocated     |
| 48 | modifications        |                                                 | interventions for a given trial participant (eg,      |
| 49 |                      |                                                 | drug dose change in response to harms,                |
| 50 |                      |                                                 | participant request, or improving / worsening         |
| 51 |                      |                                                 | disease)                                              |
| 52 |                      |                                                 |                                                       |
| 53 |                      |                                                 |                                                       |
| 54 |                      |                                                 |                                                       |
| 55 |                      |                                                 |                                                       |
| 56 |                      |                                                 |                                                       |
| 57 |                      |                                                 |                                                       |
| 58 |                      |                                                 |                                                       |
| 59 |                      |                                                 |                                                       |
| 60 |                      |                                                 |                                                       |

|    |                      |                      |                                                    |                  |
|----|----------------------|----------------------|----------------------------------------------------|------------------|
| 1  | Interventions:       | <a href="#">#11c</a> | Strategies to improve adherence to intervention    | 9                |
| 2  | adherence            |                      | protocols, and any procedures for monitoring       |                  |
| 3  |                      |                      | adherence (eg, drug tablet return; laboratory      |                  |
| 4  |                      |                      | tests)                                             |                  |
| 5  |                      |                      |                                                    |                  |
| 6  |                      |                      |                                                    |                  |
| 7  |                      |                      |                                                    |                  |
| 8  | Interventions:       | <a href="#">#11d</a> | Relevant concomitant care and interventions that   | 8                |
| 9  | concomitant care     |                      | are permitted or prohibited during the trial       |                  |
| 10 |                      |                      |                                                    |                  |
| 11 |                      |                      |                                                    |                  |
| 12 | Outcomes             | <a href="#">#12</a>  | Primary, secondary, and other outcomes,            | 10-11            |
| 13 |                      |                      | including the specific measurement variable (eg,   |                  |
| 14 |                      |                      | systolic blood pressure), analysis metric (eg,     |                  |
| 15 |                      |                      | change from baseline, final value, time to event), |                  |
| 16 |                      |                      | method of aggregation (eg, median, proportion),    |                  |
| 17 |                      |                      | and time point for each outcome. Explanation of    |                  |
| 18 |                      |                      | the clinical relevance of chosen efficacy and      |                  |
| 19 |                      |                      | harm outcomes is strongly recommended              |                  |
| 20 |                      |                      |                                                    |                  |
| 21 |                      |                      |                                                    |                  |
| 22 |                      |                      |                                                    |                  |
| 23 |                      |                      |                                                    |                  |
| 24 |                      |                      |                                                    |                  |
| 25 | Participant timeline | <a href="#">#13</a>  | Time schedule of enrolment, interventions          | 8-9 and Figure 3 |
| 26 |                      |                      | (including any run-ins and washouts),              |                  |
| 27 |                      |                      | assessments, and visits for participants. A        |                  |
| 28 |                      |                      | schematic diagram is highly recommended (see       |                  |
| 29 |                      |                      | Figure)                                            |                  |
| 30 |                      |                      |                                                    |                  |
| 31 |                      |                      |                                                    |                  |
| 32 |                      |                      |                                                    |                  |
| 33 | Sample size          | <a href="#">#14</a>  | Estimated number of participants needed to         | 11               |
| 34 |                      |                      | achieve study objectives and how it was            |                  |
| 35 |                      |                      | determined, including clinical and statistical     |                  |
| 36 |                      |                      | assumptions supporting any sample size             |                  |
| 37 |                      |                      | calculations                                       |                  |
| 38 |                      |                      |                                                    |                  |
| 39 |                      |                      |                                                    |                  |
| 40 |                      |                      |                                                    |                  |
| 41 | Recruitment          | <a href="#">#15</a>  | Strategies for achieving adequate participant      | 11               |
| 42 |                      |                      | enrolment to reach target sample size              |                  |
| 43 |                      |                      |                                                    |                  |
| 44 |                      |                      |                                                    |                  |
| 45 | Allocation: sequence | <a href="#">#16a</a> | Method of generating the allocation sequence       | 8                |
| 46 | generation           |                      | (eg, computer-generated random numbers), and       |                  |
| 47 |                      |                      | list of any factors for stratification. To reduce  |                  |
| 48 |                      |                      | predictability of a random sequence, details of    |                  |
| 49 |                      |                      | any planned restriction (eg, blocking) should be   |                  |
| 50 |                      |                      | provided in a separate document that is            |                  |
| 51 |                      |                      | unavailable to those who enrol participants or     |                  |
| 52 |                      |                      | assign interventions                               |                  |
| 53 |                      |                      |                                                    |                  |
| 54 |                      |                      |                                                    |                  |
| 55 |                      |                      |                                                    |                  |
| 56 |                      |                      |                                                    |                  |
| 57 |                      |                      |                                                    |                  |
| 58 |                      |                      |                                                    |                  |
| 59 |                      |                      |                                                    |                  |
| 60 |                      |                      |                                                    |                  |

|    |                       |                      |                                                    |     |
|----|-----------------------|----------------------|----------------------------------------------------|-----|
| 1  | Allocation            | <a href="#">#16b</a> | Mechanism of implementing the allocation           | 8   |
| 2  | concealment           |                      | sequence (eg, central telephone; sequentially      |     |
| 3  | mechanism             |                      | numbered, opaque, sealed envelopes), describing    |     |
| 4  |                       |                      | any steps to conceal the sequence until            |     |
| 5  |                       |                      | interventions are assigned                         |     |
| 6  |                       |                      |                                                    |     |
| 7  |                       |                      |                                                    |     |
| 8  |                       |                      |                                                    |     |
| 9  | Allocation:           | <a href="#">#16c</a> | Who will generate the allocation sequence, who     | 8   |
| 10 | implementation        |                      | will enrol participants, and who will assign       |     |
| 11 |                       |                      | participants to interventions                      |     |
| 12 |                       |                      |                                                    |     |
| 13 |                       |                      |                                                    |     |
| 14 | Blinding (masking)    | <a href="#">#17a</a> | Who will be blinded after assignment to            | 8   |
| 15 |                       |                      | interventions (eg, trial participants, care        |     |
| 16 |                       |                      | providers, outcome assessors, data analysts), and  |     |
| 17 |                       |                      | how                                                |     |
| 18 |                       |                      |                                                    |     |
| 19 |                       |                      |                                                    |     |
| 20 |                       |                      |                                                    |     |
| 21 | Blinding (masking):   | <a href="#">#17b</a> | If blinded, circumstances under which              | N/A |
| 22 | emergency             |                      | unblinding is permissible, and procedure for       |     |
| 23 | unblinding            |                      | revealing a participant's allocated intervention   |     |
| 24 |                       |                      | during the trial                                   |     |
| 25 |                       |                      |                                                    |     |
| 26 |                       |                      |                                                    |     |
| 27 |                       |                      |                                                    |     |
| 28 | Data collection plan  | <a href="#">#18a</a> | Plans for assessment and collection of outcome,    | 8-9 |
| 29 |                       |                      | baseline, and other trial data, including any      |     |
| 30 |                       |                      | related processes to promote data quality (eg,     |     |
| 31 |                       |                      | duplicate measurements, training of assessors)     |     |
| 32 |                       |                      | and a description of study instruments (eg,        |     |
| 33 |                       |                      | questionnaires, laboratory tests) along with their |     |
| 34 |                       |                      | reliability and validity, if known. Reference to   |     |
| 35 |                       |                      | where data collection forms can be found, if not   |     |
| 36 |                       |                      | in the protocol                                    |     |
| 37 |                       |                      |                                                    |     |
| 38 |                       |                      |                                                    |     |
| 39 |                       |                      |                                                    |     |
| 40 |                       |                      |                                                    |     |
| 41 |                       |                      |                                                    |     |
| 42 | Data collection plan: | <a href="#">#18b</a> | Plans to promote participant retention and         | 9   |
| 43 | retention             |                      | complete follow-up, including list of any          |     |
| 44 |                       |                      | outcome data to be collected for participants      |     |
| 45 |                       |                      | who discontinue or deviate from intervention       |     |
| 46 |                       |                      | protocols                                          |     |
| 47 |                       |                      |                                                    |     |
| 48 |                       |                      |                                                    |     |
| 49 |                       |                      |                                                    |     |
| 50 |                       |                      |                                                    |     |
| 51 |                       |                      |                                                    |     |
| 52 |                       |                      |                                                    |     |
| 53 |                       |                      |                                                    |     |
| 54 |                       |                      |                                                    |     |
| 55 |                       |                      |                                                    |     |
| 56 |                       |                      |                                                    |     |
| 57 |                       |                      |                                                    |     |
| 58 |                       |                      |                                                    |     |
| 59 |                       |                      |                                                    |     |
| 60 |                       |                      |                                                    |     |

and Appendix 2 for Case  
Report Form

|    |                                                  |                      |                                                                                                                                                                                                                                                                                                                                       |     |
|----|--------------------------------------------------|----------------------|---------------------------------------------------------------------------------------------------------------------------------------------------------------------------------------------------------------------------------------------------------------------------------------------------------------------------------------|-----|
| 1  | Data management                                  | <a href="#">#19</a>  | Plans for data entry, coding, security, and storage, including any related processes to promote data quality (eg, double data entry; range checks for data values). Reference to where details of data management procedures can be found, if not in the protocol                                                                     | 12  |
| 2  |                                                  |                      |                                                                                                                                                                                                                                                                                                                                       |     |
| 3  |                                                  |                      |                                                                                                                                                                                                                                                                                                                                       |     |
| 4  |                                                  |                      |                                                                                                                                                                                                                                                                                                                                       |     |
| 5  |                                                  |                      |                                                                                                                                                                                                                                                                                                                                       |     |
| 6  |                                                  |                      |                                                                                                                                                                                                                                                                                                                                       |     |
| 7  |                                                  |                      |                                                                                                                                                                                                                                                                                                                                       |     |
| 8  |                                                  |                      |                                                                                                                                                                                                                                                                                                                                       |     |
| 9  |                                                  |                      |                                                                                                                                                                                                                                                                                                                                       |     |
| 10 |                                                  |                      |                                                                                                                                                                                                                                                                                                                                       |     |
| 11 |                                                  |                      |                                                                                                                                                                                                                                                                                                                                       |     |
| 12 |                                                  |                      |                                                                                                                                                                                                                                                                                                                                       |     |
| 13 | Statistics: outcomes                             | <a href="#">#20a</a> | Statistical methods for analysing primary and secondary outcomes. Reference to where other details of the statistical analysis plan can be found, if not in the protocol                                                                                                                                                              | 11  |
| 14 |                                                  |                      |                                                                                                                                                                                                                                                                                                                                       |     |
| 15 |                                                  |                      |                                                                                                                                                                                                                                                                                                                                       |     |
| 16 |                                                  |                      |                                                                                                                                                                                                                                                                                                                                       |     |
| 17 |                                                  |                      |                                                                                                                                                                                                                                                                                                                                       |     |
| 18 |                                                  |                      |                                                                                                                                                                                                                                                                                                                                       |     |
| 19 |                                                  |                      |                                                                                                                                                                                                                                                                                                                                       |     |
| 20 | Statistics: additional analyses                  | <a href="#">#20b</a> | Methods for any additional analyses (eg, subgroup and adjusted analyses)                                                                                                                                                                                                                                                              | 11  |
| 21 |                                                  |                      |                                                                                                                                                                                                                                                                                                                                       |     |
| 22 |                                                  |                      |                                                                                                                                                                                                                                                                                                                                       |     |
| 23 |                                                  |                      |                                                                                                                                                                                                                                                                                                                                       |     |
| 24 | Statistics: analysis population and missing data | <a href="#">#20c</a> | Definition of analysis population relating to protocol non-adherence (eg, as randomised analysis), and any statistical methods to handle missing data (eg, multiple imputation)                                                                                                                                                       | 11  |
| 25 |                                                  |                      |                                                                                                                                                                                                                                                                                                                                       |     |
| 26 |                                                  |                      |                                                                                                                                                                                                                                                                                                                                       |     |
| 27 |                                                  |                      |                                                                                                                                                                                                                                                                                                                                       |     |
| 28 |                                                  |                      |                                                                                                                                                                                                                                                                                                                                       |     |
| 29 |                                                  |                      |                                                                                                                                                                                                                                                                                                                                       |     |
| 30 |                                                  |                      |                                                                                                                                                                                                                                                                                                                                       |     |
| 31 | Data monitoring: formal committee                | <a href="#">#21a</a> | Composition of data monitoring committee (DMC); summary of its role and reporting structure; statement of whether it is independent from the sponsor and competing interests; and reference to where further details about its charter can be found, if not in the protocol. Alternatively, an explanation of why a DMC is not needed | N/A |
| 32 |                                                  |                      |                                                                                                                                                                                                                                                                                                                                       |     |
| 33 |                                                  |                      |                                                                                                                                                                                                                                                                                                                                       |     |
| 34 |                                                  |                      |                                                                                                                                                                                                                                                                                                                                       |     |
| 35 |                                                  |                      |                                                                                                                                                                                                                                                                                                                                       |     |
| 36 |                                                  |                      |                                                                                                                                                                                                                                                                                                                                       |     |
| 37 |                                                  |                      |                                                                                                                                                                                                                                                                                                                                       |     |
| 38 |                                                  |                      |                                                                                                                                                                                                                                                                                                                                       |     |
| 39 |                                                  |                      |                                                                                                                                                                                                                                                                                                                                       |     |
| 40 |                                                  |                      |                                                                                                                                                                                                                                                                                                                                       |     |
| 41 |                                                  |                      |                                                                                                                                                                                                                                                                                                                                       |     |
| 42 |                                                  |                      |                                                                                                                                                                                                                                                                                                                                       |     |
| 43 | Data monitoring: interim analysis                | <a href="#">#21b</a> | Description of any interim analyses and stopping guidelines, including who will have access to these interim results and make the final decision to terminate the trial                                                                                                                                                               | N/A |
| 44 |                                                  |                      |                                                                                                                                                                                                                                                                                                                                       |     |
| 45 |                                                  |                      |                                                                                                                                                                                                                                                                                                                                       |     |
| 46 |                                                  |                      |                                                                                                                                                                                                                                                                                                                                       |     |
| 47 |                                                  |                      |                                                                                                                                                                                                                                                                                                                                       |     |
| 48 |                                                  |                      |                                                                                                                                                                                                                                                                                                                                       |     |
| 49 |                                                  |                      |                                                                                                                                                                                                                                                                                                                                       |     |
| 50 | Harms                                            | <a href="#">#22</a>  | Plans for collecting, assessing, reporting, and managing solicited and spontaneously reported adverse events and other unintended effects of trial interventions or trial conduct                                                                                                                                                     | 11  |
| 51 |                                                  |                      |                                                                                                                                                                                                                                                                                                                                       |     |
| 52 |                                                  |                      |                                                                                                                                                                                                                                                                                                                                       |     |
| 53 |                                                  |                      |                                                                                                                                                                                                                                                                                                                                       |     |
| 54 |                                                  |                      |                                                                                                                                                                                                                                                                                                                                       |     |
| 55 |                                                  |                      |                                                                                                                                                                                                                                                                                                                                       |     |
| 56 |                                                  |                      |                                                                                                                                                                                                                                                                                                                                       |     |
| 57 |                                                  |                      |                                                                                                                                                                                                                                                                                                                                       |     |
| 58 |                                                  |                      |                                                                                                                                                                                                                                                                                                                                       |     |
| 59 |                                                  |                      |                                                                                                                                                                                                                                                                                                                                       |     |
| 60 |                                                  |                      |                                                                                                                                                                                                                                                                                                                                       |     |

|    |                                      |                      |                                                                                                                                                                                                                                    |         |
|----|--------------------------------------|----------------------|------------------------------------------------------------------------------------------------------------------------------------------------------------------------------------------------------------------------------------|---------|
| 1  | Auditing                             | <a href="#">#23</a>  | Frequency and procedures for auditing trial conduct, if any, and whether the process will be independent from investigators and the sponsor                                                                                        | N/A     |
| 2  |                                      |                      |                                                                                                                                                                                                                                    |         |
| 3  |                                      |                      |                                                                                                                                                                                                                                    |         |
| 4  |                                      |                      |                                                                                                                                                                                                                                    |         |
| 5  |                                      |                      |                                                                                                                                                                                                                                    |         |
| 6  | Research ethics approval             | <a href="#">#24</a>  | Plans for seeking research ethics committee / institutional review board (REC / IRB) approval                                                                                                                                      | 14-15   |
| 7  |                                      |                      |                                                                                                                                                                                                                                    |         |
| 8  |                                      |                      |                                                                                                                                                                                                                                    |         |
| 9  |                                      |                      |                                                                                                                                                                                                                                    |         |
| 10 | Protocol amendments                  | <a href="#">#25</a>  | Plans for communicating important protocol modifications (eg, changes to eligibility criteria, outcomes, analyses) to relevant parties (eg, investigators, REC / IRBs, trial participants, trial registries, journals, regulators) | 12-13   |
| 11 |                                      |                      |                                                                                                                                                                                                                                    |         |
| 12 |                                      |                      |                                                                                                                                                                                                                                    |         |
| 13 |                                      |                      |                                                                                                                                                                                                                                    |         |
| 14 |                                      |                      |                                                                                                                                                                                                                                    |         |
| 15 |                                      |                      |                                                                                                                                                                                                                                    |         |
| 16 |                                      |                      |                                                                                                                                                                                                                                    |         |
| 17 |                                      |                      |                                                                                                                                                                                                                                    |         |
| 18 | Consent or assent                    | <a href="#">#26a</a> | Who will obtain informed consent or assent from potential trial participants or authorised surrogates, and how (see Item 32)                                                                                                       | 8       |
| 19 |                                      |                      |                                                                                                                                                                                                                                    |         |
| 20 |                                      |                      |                                                                                                                                                                                                                                    |         |
| 21 |                                      |                      |                                                                                                                                                                                                                                    |         |
| 22 |                                      |                      |                                                                                                                                                                                                                                    |         |
| 23 |                                      |                      |                                                                                                                                                                                                                                    |         |
| 24 | Consent or assent: ancillary studies | <a href="#">#26b</a> | Additional consent provisions for collection and use of participant data and biological specimens in ancillary studies, if applicable                                                                                              | N/A     |
| 25 |                                      |                      |                                                                                                                                                                                                                                    |         |
| 26 |                                      |                      |                                                                                                                                                                                                                                    |         |
| 27 |                                      |                      |                                                                                                                                                                                                                                    |         |
| 28 |                                      |                      |                                                                                                                                                                                                                                    |         |
| 29 | Confidentiality                      | <a href="#">#27</a>  | How personal information about potential and enrolled participants will be collected, shared, and maintained in order to protect confidentiality before, during, and after the trial                                               | 12      |
| 30 |                                      |                      |                                                                                                                                                                                                                                    |         |
| 31 |                                      |                      |                                                                                                                                                                                                                                    |         |
| 32 |                                      |                      |                                                                                                                                                                                                                                    |         |
| 33 |                                      |                      |                                                                                                                                                                                                                                    |         |
| 34 |                                      |                      |                                                                                                                                                                                                                                    |         |
| 35 |                                      |                      |                                                                                                                                                                                                                                    |         |
| 36 | Declaration of interests             | <a href="#">#28</a>  | Financial and other competing interests for principal investigators for the overall trial and each study site                                                                                                                      | 13      |
| 37 |                                      |                      |                                                                                                                                                                                                                                    |         |
| 38 |                                      |                      |                                                                                                                                                                                                                                    |         |
| 39 |                                      |                      |                                                                                                                                                                                                                                    |         |
| 40 |                                      |                      |                                                                                                                                                                                                                                    |         |
| 41 | Data access                          | <a href="#">#29</a>  | Statement of who will have access to the final trial dataset, and disclosure of contractual agreements that limit such access for investigators                                                                                    | Table 1 |
| 42 |                                      |                      |                                                                                                                                                                                                                                    |         |
| 43 |                                      |                      |                                                                                                                                                                                                                                    |         |
| 44 |                                      |                      |                                                                                                                                                                                                                                    |         |
| 45 |                                      |                      |                                                                                                                                                                                                                                    |         |
| 46 |                                      |                      |                                                                                                                                                                                                                                    |         |
| 47 |                                      |                      |                                                                                                                                                                                                                                    |         |
| 48 | Ancillary and post trial care        | <a href="#">#30</a>  | Provisions, if any, for ancillary and post-trial care, and for compensation to those who suffer harm from trial participation                                                                                                      | N/A     |
| 49 |                                      |                      |                                                                                                                                                                                                                                    |         |
| 50 |                                      |                      |                                                                                                                                                                                                                                    |         |
| 51 |                                      |                      |                                                                                                                                                                                                                                    |         |
| 52 |                                      |                      |                                                                                                                                                                                                                                    |         |
| 53 |                                      |                      |                                                                                                                                                                                                                                    |         |
| 54 | Dissemination policy: trial results  | <a href="#">#31a</a> | Plans for investigators and sponsor to communicate trial results to participants, healthcare professionals, the public, and other relevant groups (eg, via publication, reporting in                                               | 13      |
| 55 |                                      |                      |                                                                                                                                                                                                                                    |         |
| 56 |                                      |                      |                                                                                                                                                                                                                                    |         |
| 57 |                                      |                      |                                                                                                                                                                                                                                    |         |
| 58 |                                      |                      |                                                                                                                                                                                                                                    |         |
| 59 |                                      |                      |                                                                                                                                                                                                                                    |         |
| 60 |                                      |                      |                                                                                                                                                                                                                                    |         |

1 results databases, or other data sharing  
2 arrangements), including any publication  
3 restrictions  
4

|    |                      |                      |                                                  |            |
|----|----------------------|----------------------|--------------------------------------------------|------------|
| 5  | 3Dissemination       | <a href="#">#31b</a> | Authorship eligibility guidelines and any        | 15-16      |
| 6  | policy: authorship   |                      | intended use of professional writers             |            |
| 7  |                      |                      |                                                  |            |
| 8  |                      |                      |                                                  |            |
| 9  | Dissemination        | <a href="#">#31c</a> | Plans, if any, for granting public access to the | Table 1    |
| 10 | policy: reproducible |                      | full protocol, participant-level dataset, and    |            |
| 11 | research             |                      | statistical code                                 |            |
| 12 |                      |                      |                                                  |            |
| 13 |                      |                      |                                                  |            |
| 14 | Informed consent     | <a href="#">#32</a>  | Model consent form and other related             | Appendix 1 |
| 15 | materials            |                      | documentation given to participants and          |            |
| 16 |                      |                      | authorised surrogates                            |            |
| 17 |                      |                      |                                                  |            |
| 18 |                      |                      |                                                  |            |
| 19 |                      |                      |                                                  |            |
| 20 | Biological           | <a href="#">#33</a>  | Plans for collection, laboratory evaluation, and | N/A        |
| 21 | specimens            |                      | storage of biological specimens for genetic or   |            |
| 22 |                      |                      | molecular analysis in the current trial and for  |            |
| 23 |                      |                      | future use in ancillary studies, if applicable   |            |
| 24 |                      |                      |                                                  |            |
| 25 |                      |                      |                                                  |            |
| 26 |                      |                      |                                                  |            |

27 The SPIRIT checklist is distributed under the terms of the Creative Commons Attribution License CC-BY-ND  
28 3.0. This checklist can be completed online using <https://www.goodreports.org/>, a tool made by the [EQUATOR](#)  
29 [Network](#) in collaboration with [Penelope.ai](#)  
30  
31  
32  
33  
34  
35  
36  
37  
38  
39  
40  
41  
42  
43  
44  
45  
46  
47  
48  
49  
50  
51  
52  
53  
54  
55  
56  
57  
58  
59  
60
