# Supplementary material for: Virtual reality-based distraction for intravenous insertion-related distress in children: a study protocol for a randomised controlled trial
Source: PubMed Central journal article supplement — BMJ Open. 2022 Mar 29;12(3):e057892. doi: 10.1136/bmjopen-2021-057892 (PMC8968513; doi:10.1136/bmjopen-2021-057892), 2022-03-29
Supplement: bmjopen-2021-057892supp001.pdf [file bmjopen-2021-057892supp001.pdf]

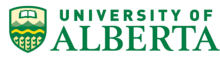

**A randomized controlled trial of virtual reality-based distraction for venipuncture-related distress in children:  
The VR Study**

| REB #: Pro00095418 | Screening ID      | Enrolment Date                                |
|--------------------|-------------------|-----------------------------------------------|
| PI: Dr. Samina Ali | <b>VR -</b> _____ | ____ / ____ / 20____<br>dd      mmm      yyyy |

## Pre-Screening

|                                              |                                                                                                                                                                                                                                                                                                                                   |
|----------------------------------------------|-----------------------------------------------------------------------------------------------------------------------------------------------------------------------------------------------------------------------------------------------------------------------------------------------------------------------------------|
| Date and Time of Triage                      | ____ / ____ / ____<br>dd      mmm      yyyy<br>____ : ____<br>(24 hour clock)                                                                                                                                                                                                                                                     |
| Child's Age                                  | _____ years                                                                                                                                                                                                                                                                                                                       |
| Child's Sex                                  | <input type="checkbox"/> Female <input type="checkbox"/> Male                                                                                                                                                                                                                                                                     |
| Was the family approached for this study?    | <input type="checkbox"/> Yes <input type="checkbox"/> No                                                                                                                                                                                                                                                                          |
| If <b>NO</b> , specify reason and STOP HERE. | <input type="checkbox"/> Family refused overall consent to be approached for research<br><input type="checkbox"/> Legal guardian not present<br><input type="checkbox"/> RA busy with another study<br><input type="checkbox"/> Did not meet eligibility criteria, specify _____<br><input type="checkbox"/> Other, Specify _____ |
| If YES, continue to Eligibility.             |                                                                                                                                                                                                                                                                                                                                   |

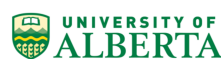

**A randomized controlled trial of virtual reality-based distraction for venipuncture-related distress in children:  
The VR Study**

| REB #: Pro00095418 | Screening ID      | Enrolment Date            |
|--------------------|-------------------|---------------------------|
| PI: Dr. Samina Ali | <b>VR - _____</b> | __/__/20__<br>dd mmm yyyy |

## Eligibility

Was verbal consent for screening obtained from the family?  Yes  No

## Inclusion Criteria

|                                                           |                              |                             |
|-----------------------------------------------------------|------------------------------|-----------------------------|
| 1. Child aged 6-17 years                                  | <input type="checkbox"/> Yes | <input type="checkbox"/> No |
| 2. Requires IV placement                                  | <input type="checkbox"/> Yes | <input type="checkbox"/> No |
| 3. Will receive topical anesthetic cream for IV placement | <input type="checkbox"/> Yes | <input type="checkbox"/> No |

## Exclusion Criteria

|                                                                                                                                                                                                                                                                                                                                                                                  |                              |                             |
|----------------------------------------------------------------------------------------------------------------------------------------------------------------------------------------------------------------------------------------------------------------------------------------------------------------------------------------------------------------------------------|------------------------------|-----------------------------|
| 1. Medically unstable (i.e. CTAS 1, requires immediate IV insertion)                                                                                                                                                                                                                                                                                                             | <input type="checkbox"/> Yes | <input type="checkbox"/> No |
| 2. Unconscious or not fully alert                                                                                                                                                                                                                                                                                                                                                | <input type="checkbox"/> Yes | <input type="checkbox"/> No |
| 3. Visual, auditory or cognitive or mental health issues precluding safe interaction with the VR intervention                                                                                                                                                                                                                                                                    | <input type="checkbox"/> Yes | <input type="checkbox"/> No |
| 4. Conditions that could be exacerbated by the VR environment (as reported by the family) <ul style="list-style-type: none"> <li>a. <i>current</i> symptomatic nausea / vomiting / dizziness / migraine</li> <li>b. <i>history</i> of psychosis / hallucinations / epilepsy</li> </ul>                                                                                           | <input type="checkbox"/> Yes | <input type="checkbox"/> No |
| 5. Presence of an infection / injury which could contaminate the VR intervention equipment (as determined by the healthcare team) including but not limited to <ul style="list-style-type: none"> <li>a. open wounds / infections of the head and neck area</li> <li>b. suspected or confirmed methicillin-resistant <i>Staphylococcus aureus</i> (MRSA) colonization</li> </ul> | <input type="checkbox"/> Yes | <input type="checkbox"/> No |
| 6. Screens positive for 'influenza-like illness' (ILI) as per the current SCH ED screening criteria                                                                                                                                                                                                                                                                              | <input type="checkbox"/> Yes | <input type="checkbox"/> No |
| 7. Child or Parental language barrier precluding the ability to understand and complete study assessments, in the absence of a native language translator                                                                                                                                                                                                                        | <input type="checkbox"/> Yes | <input type="checkbox"/> No |
| 8. Previous enrollment (of child OR parent) in this study                                                                                                                                                                                                                                                                                                                        | <input type="checkbox"/> Yes | <input type="checkbox"/> No |

Is the family eligible for the study?  Yes  No

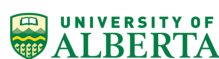

**A randomized controlled trial of virtual reality-based distraction for venipuncture-related distress in children:  
The VR Study**

| REB #: Pro00095418 | Screening ID            | Enrolment Date                         |
|--------------------|-------------------------|----------------------------------------|
| PI: Dr. Samina Ali | <b>VR -</b> ___ ___ ___ | ___ / ___ / 20___<br>dd    mmm    yyyy |

## Informed Consent

Has written informed consent been obtained from the **parent/ legal guardian**?       Yes     No

### If NO,

|                               |                                                                                                                                                  |
|-------------------------------|--------------------------------------------------------------------------------------------------------------------------------------------------|
| Specify reason and STOP HERE. | <input type="checkbox"/> Declined consent<br><input type="checkbox"/> Declined assent<br><input type="checkbox"/> Other, please specify<br>_____ |
|-------------------------------|--------------------------------------------------------------------------------------------------------------------------------------------------|

### If YES,

|                                                                                                                                                                                                                                                                                                                                                          |                                                                                                                                                                                                                |
|----------------------------------------------------------------------------------------------------------------------------------------------------------------------------------------------------------------------------------------------------------------------------------------------------------------------------------------------------------|----------------------------------------------------------------------------------------------------------------------------------------------------------------------------------------------------------------|
| Specify the date and time of Informed Consent:                                                                                                                                                                                                                                                                                                           | ___ / ___ / ___<br>dd    mmm    yyyy<br>:<br>_____<br>(24 hour clock)                                                                                                                                          |
| Has a copy of the signed informed consent been given to the family?                                                                                                                                                                                                                                                                                      | <input type="checkbox"/> Yes<br><input type="checkbox"/> No; specify: _____                                                                                                                                    |
| Has written assent been obtained from the <b>child</b> ?                                                                                                                                                                                                                                                                                                 | <input type="checkbox"/> Yes<br><input type="checkbox"/> No; specify: _____<br><input type="checkbox"/> No, but verbal assent was obtained and documented<br><input type="checkbox"/> Not required; child < 7y |
| Has a copy of the signed assent been given to the family?                                                                                                                                                                                                                                                                                                | <input type="checkbox"/> Yes<br><input type="checkbox"/> No; specify: _____                                                                                                                                    |
| Has written informed consent been provided by the <b>clinical nurse</b> ?<br><i>Note: Consent only needs to be provided by the clinical nurse once for the entire duration of the study (for all 80-90 participants). If consent has not been previously completed with the clinical nurse, make sure a signed copy is completed before recruitment.</i> | <input type="checkbox"/> Yes<br><input type="checkbox"/> No; specify: _____                                                                                                                                    |
| Clinical Nurse Study ID Number:                                                                                                                                                                                                                                                                                                                          | _____                                                                                                                                                                                                          |

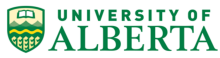

**A randomized controlled trial of virtual reality-based distraction for venipuncture-related distress in children:  
The VR Study**

| REB #: Pro00095418 | Screening ID        | Enrolment Date                      |
|--------------------|---------------------|-------------------------------------|
| PI: Dr. Samina Ali | VR - ____ ____ ____ | ____ / ____ / 20____<br>dd mmm yyyy |

## Randomization

If the child satisfies the inclusion/ exclusion criteria and written informed consent has been provided, please RANDOMIZE the participant by clicking on the Randomize button below:

|                  |                                                                                                  |
|------------------|--------------------------------------------------------------------------------------------------|
| <b>Study Arm</b> | <input type="checkbox"/> <b>VR Intervention</b><br><input type="checkbox"/> <b>Standard Care</b> |
|------------------|--------------------------------------------------------------------------------------------------|





**A randomized controlled trial of virtual reality-based distraction for venipuncture-related distress in children:  
The VR Study**

| REB #: Pro00095418 | Screening ID      | Enrolment Date            |
|--------------------|-------------------|---------------------------|
| PI: Dr. Samina Ali | <b>VR -</b> _____ | __/__/20__<br>dd mmm yyyy |

## Demographics & History

### Demographics

|                                                               |                                                                                                                                                                                                                                                                                                                               |
|---------------------------------------------------------------|-------------------------------------------------------------------------------------------------------------------------------------------------------------------------------------------------------------------------------------------------------------------------------------------------------------------------------|
| Parent/ Caregiver relationship to child                       | <input type="checkbox"/> Mother<br><input type="checkbox"/> Father<br><input type="checkbox"/> Other; specify: _____                                                                                                                                                                                                          |
| Parent / Caregiver Age                                        | _____ years; or <input type="checkbox"/> Prefer not to answer                                                                                                                                                                                                                                                                 |
| Parent / Caregiver Sex                                        | <input type="checkbox"/> Female<br><input type="checkbox"/> Male                                                                                                                                                                                                                                                              |
| Parent / Caregiver Highest level of Education                 | <input type="checkbox"/> Elementary School<br><input type="checkbox"/> High School or some High School<br><input type="checkbox"/> Diploma/ Certificate<br><input type="checkbox"/> Some Post-Secondary/ University<br><input type="checkbox"/> University/ Professional Degree<br><input type="checkbox"/> Decline to answer |
| First three digits of postal code                             | __ __ __ (1 <sup>st</sup> 3 digits ONLY)                                                                                                                                                                                                                                                                                      |
| Do you identify your child as a member of an ethnic minority? | <input type="checkbox"/> Yes<br><input type="checkbox"/> No                                                                                                                                                                                                                                                                   |

### Medical History

|                                                                                                       |                                                             |
|-------------------------------------------------------------------------------------------------------|-------------------------------------------------------------|
| Was your child born prematurely?                                                                      | <input type="checkbox"/> Yes<br><input type="checkbox"/> No |
| <ul style="list-style-type: none"> <li>If yes, at how many weeks gestation?</li> </ul>                | _____ weeks                                                 |
| Has your child ever been to the Emergency Department before today?                                    | <input type="checkbox"/> Yes<br><input type="checkbox"/> No |
| <ul style="list-style-type: none"> <li>If yes, how many times:</li> </ul>                             | _____ times                                                 |
| Has your child ever been hospitalized?                                                                | <input type="checkbox"/> Yes<br><input type="checkbox"/> No |
| <ul style="list-style-type: none"> <li>If yes, how many times:</li> </ul>                             | _____ times                                                 |
| Has your child ever had a needle poke in their vein to draw blood or put in an intravenous (IV) line? | <input type="checkbox"/> Yes<br><input type="checkbox"/> No |

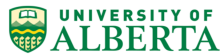

**A randomized controlled trial of virtual reality-based distraction for venipuncture-related distress in children:  
The VR Study**

|                           |                     |                                     |
|---------------------------|---------------------|-------------------------------------|
| <b>REB #:</b> Pro00095418 | <b>Screening ID</b> | <b>Enrolment Date</b>               |
| <b>PI:</b> Dr. Samina Ali | <b>VR - _____</b>   | ____ / ____ / 20____<br>dd mmm yyyy |

|                                                                                                                                                                                                                                                                                                          |                                                                                                                                                                                                     |
|----------------------------------------------------------------------------------------------------------------------------------------------------------------------------------------------------------------------------------------------------------------------------------------------------------|-----------------------------------------------------------------------------------------------------------------------------------------------------------------------------------------------------|
| If yes, how distressed was your child during the procedure? ( <i>if more than one occurrence, ask the parent to recall the most recent event</i> ) Choose a number between 1 and 5 that best describes your child's distress where 1 indicates 'no distress at all' and 5 is 'as distressed as possible' | <input type="checkbox"/> 1 (no distress at all)<br><input type="checkbox"/> 2<br><input type="checkbox"/> 3<br><input type="checkbox"/> 4<br><input type="checkbox"/> 5 (as distressed as possible) |
|----------------------------------------------------------------------------------------------------------------------------------------------------------------------------------------------------------------------------------------------------------------------------------------------------------|-----------------------------------------------------------------------------------------------------------------------------------------------------------------------------------------------------|

### Child Experience with Technology

|                                                                                                                                                                                                       |                                                                                                                                                                                                       |                                                                                                                                                                                                                                                                                                                                      |                                                                                                                                                                                                       |
|-------------------------------------------------------------------------------------------------------------------------------------------------------------------------------------------------------|-------------------------------------------------------------------------------------------------------------------------------------------------------------------------------------------------------|--------------------------------------------------------------------------------------------------------------------------------------------------------------------------------------------------------------------------------------------------------------------------------------------------------------------------------------|-------------------------------------------------------------------------------------------------------------------------------------------------------------------------------------------------------|
| Has your child played with/ used any of the following devices before to <b>play games</b> ?                                                                                                           |                                                                                                                                                                                                       | <input type="checkbox"/> iPad/ iPod/ iPhone / Tablet ( <i>to play games</i> )<br><input type="checkbox"/> Gaming console<br>(ex. Xbox, Nintendo, PS4, other)<br><input type="checkbox"/> Virtual Reality (VR) device<br>(ex. Oculus Quest/ Rift, Samsung Gear VR, HTC Vive, PlayStation VR, other)<br><input type="checkbox"/> Robot |                                                                                                                                                                                                       |
| If yes, how frequently?                                                                                                                                                                               |                                                                                                                                                                                                       |                                                                                                                                                                                                                                                                                                                                      |                                                                                                                                                                                                       |
| <b>iPad/ iPod/ iPhone / Tablet:</b>                                                                                                                                                                   | <b>Gaming console</b>                                                                                                                                                                                 | <b>VR device</b>                                                                                                                                                                                                                                                                                                                     | <b>Robot</b>                                                                                                                                                                                          |
| <input type="checkbox"/> ____ hours/ week<br><input type="checkbox"/> Less than Once per week<br><input type="checkbox"/> Less than 5 times in total<br><input type="checkbox"/> Other, specify _____ | <input type="checkbox"/> ____ hours/ week<br><input type="checkbox"/> Less than Once per week<br><input type="checkbox"/> Less than 5 times in total<br><input type="checkbox"/> Other, specify _____ | <input type="checkbox"/> ____ hours/ week<br><input type="checkbox"/> Less than Once per week<br><input type="checkbox"/> Less than 5 times in total<br><input type="checkbox"/> Other, specify _____                                                                                                                                | <input type="checkbox"/> ____ hours/ week<br><input type="checkbox"/> Less than Once per week<br><input type="checkbox"/> Less than 5 times in total<br><input type="checkbox"/> Other, specify _____ |

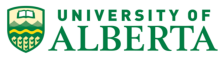

**A randomized controlled trial of virtual reality-based distraction for venipuncture-related distress in children:  
The VR Study**

| REB #: Pro00095418 | Screening ID | Enrolment Date               |
|--------------------|--------------|------------------------------|
| PI: Dr. Samina Ali | VR - _____   | ___/___/20___<br>dd mmm yyyy |

**PRE-Procedure: Child Scores**

**NOTE:** Begin the video recorder (iPad) approximately 5 minutes before the start of the IV procedure, and stop the recording 5 minutes after the end of the procedure.

**Baseline Scores: Child**

|                                                                                                                                                                                                                                                                                                                                                                                                                                                                    |                                                       |
|--------------------------------------------------------------------------------------------------------------------------------------------------------------------------------------------------------------------------------------------------------------------------------------------------------------------------------------------------------------------------------------------------------------------------------------------------------------------|-------------------------------------------------------|
| Heart Rate (record from Triage)                                                                                                                                                                                                                                                                                                                                                                                                                                    | ___ bpm                                               |
| Time pre-procedure scores collected                                                                                                                                                                                                                                                                                                                                                                                                                                | ___/___/___<br>dd mmm yyyy<br>:___<br>(24 hour clock) |
| Pain Score: verbal Numerical Rating Scale (vNRS)<br>“On a scale of 0 to 10, where 0 is no pain and 10 is the worst pain you can imagine, what is your pain level now?”                                                                                                                                                                                                                                                                                             | ___ / 10                                              |
| Distress Score: Numerical Rating Scale<br>“On a scale of 0 to 10, where 0 is no distress and 10 is the most distress you can imagine having, what is your distress level now?”                                                                                                                                                                                                                                                                                     | ___ / 10                                              |
| Fear Score: Children’s Fear Scale (CFS)<br>“These faces are showing different amounts of being scared. This face [point to the left-most face] is not scared at all, this face is a little bit more scared [point to the second face from left], a bit more scared [sweep finger along scale], right up to the most scared possible [point to the last face on the right]. Have a look at these faces and choose the one that shows how scared you are right now.” |                                                       |



**A randomized controlled trial of virtual reality-based distraction for venipuncture-related distress in children:  
The VR Study**

| REB #: Pro00095418 | Screening ID | Enrolment Date               |
|--------------------|--------------|------------------------------|
| PI: Dr. Samina Ali | VR - _____   | ___/___/20___<br>dd mmm yyyy |

**PRE-Procedure: Parent / Caregiver STAI Questionnaire**

We would ask that you complete the following questions as they relate to your feelings about your child’s upcoming IV procedure, today. A number of statements which people have used to describe themselves are given below. Read each statement and then circle the appropriate number to indicate how you feel **right now**, that is, **at this moment**. There are no right or wrong answers. Do not spend too much time on any one statement but give the answer which seems to describe your feelings best.

1-----2-----3-----4  
Not at all      Somewhat      Moderately so      Very much so

- |                                                           |   |   |   |   |
|-----------------------------------------------------------|---|---|---|---|
| 1. I feel calm.....                                       | 1 | 2 | 3 | 4 |
| 2. I feel secure.....                                     | 1 | 2 | 3 | 4 |
| 3. I am tense.....                                        | 1 | 2 | 3 | 4 |
| 4. I feel strained.....                                   | 1 | 2 | 3 | 4 |
| 5. I feel at ease.....                                    | 1 | 2 | 3 | 4 |
| 6. I feel upset.....                                      | 1 | 2 | 3 | 4 |
| 7. I am presently worrying over possible misfortunes..... | 1 | 2 | 3 | 4 |
| 8. I feel satisfied.....                                  | 1 | 2 | 3 | 4 |
| 9. I feel frightened.....                                 | 1 | 2 | 3 | 4 |
| 10. I feel comfortable.....                               | 1 | 2 | 3 | 4 |
| 11. I feel self-confident.....                            | 1 | 2 | 3 | 4 |
| 12. I feel nervous.....                                   | 1 | 2 | 3 | 4 |
| 13. I am jittery.....                                     | 1 | 2 | 3 | 4 |
| 14. I feel indecisive.....                                | 1 | 2 | 3 | 4 |
| 15. I am relaxed.....                                     | 1 | 2 | 3 | 4 |
| 16. I feel content.....                                   | 1 | 2 | 3 | 4 |
| 17. I am worried.....                                     | 1 | 2 | 3 | 4 |
| 18. I feel confused.....                                  | 1 | 2 | 3 | 4 |
| 19. I feel steady.....                                    | 1 | 2 | 3 | 4 |
| 20. I feel pleasant.....                                  | 1 | 2 | 3 | 4 |



**A randomized controlled trial of virtual reality-based distraction for venipuncture-related distress in children:  
The VR Study**

| REB #: Pro00095418 | Screening ID      | Enrolment Date                  |
|--------------------|-------------------|---------------------------------|
| PI: Dr. Samina Ali | <b>VR -</b> _____ | ____/____/20____<br>dd mmm yyyy |

### DURING-Procedure

- Start the iPad video recording approximately 5 minutes prior to the start of the procedure.
- For children randomized to the VR group: Immediately after PRE-procedure scores and STAI are completed, research assistant will set up the VR equipment.
- The staff ED nurse will then begin the IV set-up

|                                                                                                                                                                                                                                                                                                |                                                                                                                                                                                                                                                          |
|------------------------------------------------------------------------------------------------------------------------------------------------------------------------------------------------------------------------------------------------------------------------------------------------|----------------------------------------------------------------------------------------------------------------------------------------------------------------------------------------------------------------------------------------------------------|
| <b>Start time of IV procedure:</b><br><br><i>(Defined as the time the staff nurse begins to clean the IV site)</i>                                                                                                                                                                             | ____/____/____<br>dd mmm yyyy<br>:<br>_____<br>(24 hour clock)                                                                                                                                                                                           |
| <b>End time of IV procedure/ attempt:</b><br><br><i>(Defined as the last point of contact by the staff nurse (ex. taping cannula in place with or without arm board, wrapping arm with gauze and taping the gauze in place)</i>                                                                | ____/____/____<br>dd mmm yyyy<br>:<br>_____<br>(24 hour clock)                                                                                                                                                                                           |
| Position of Child during IV attempt:                                                                                                                                                                                                                                                           | <input type="checkbox"/> Sitting up <input type="checkbox"/> Lying down (supine)                                                                                                                                                                         |
| Location of first IV attempt:                                                                                                                                                                                                                                                                  | <input type="checkbox"/> Antecubital Fossa – RIGHT<br><input type="checkbox"/> Antecubital Fossa – RIGHT<br><input type="checkbox"/> Dorsum hand – RIGHT<br><input type="checkbox"/> Dorsum hand – LEFT<br><input type="checkbox"/> Other, specify _____ |
| Was the first IV placement attempt successful?                                                                                                                                                                                                                                                 | <input type="checkbox"/> Yes <input type="checkbox"/> No                                                                                                                                                                                                 |
| <ul style="list-style-type: none"> <li>• If NO, how many attempts, in total, were made for the IV during this 'episode'?</li> </ul>                                                                                                                                                            | _____ attempts                                                                                                                                                                                                                                           |
| <ul style="list-style-type: none"> <li>• Was an IV successfully placed during this 'episode'?</li> </ul>                                                                                                                                                                                       | <input type="checkbox"/> Yes <input type="checkbox"/> No                                                                                                                                                                                                 |
| Any adverse events or side effects?<br><br><i>Do not suggest any AEs to the participant; Instead, ask more general questions such as "how are you feeling?" or "are you having any side effects?" or "are you feeling any different than before?", and let the child answer spontaneously.</i> | <input type="checkbox"/> Yes <input type="checkbox"/> No<br><br>If "YES", complete a separate entry for each AE on the AE Form                                                                                                                           |



**A randomized controlled trial of virtual reality-based distraction for venipuncture-related distress in children:  
The VR Study**

| REB #: Pro00095418 | Screening ID | Enrolment Date                   |
|--------------------|--------------|----------------------------------|
| PI: Dr. Samina Ali | VR - _____   | ___ / ___ / 20___<br>dd mmm yyyy |

## IMMEDIATELY POST-Procedure: Child Scores

**NOTE:** Post-procedure scores/ questionnaires should be collected as soon as possible after the procedure is complete:

### Post-procedure Scores: Child

|                                                                                                                                                                                                                                                                                                                                                                                                                                                                                                                                                    |                                                        |
|----------------------------------------------------------------------------------------------------------------------------------------------------------------------------------------------------------------------------------------------------------------------------------------------------------------------------------------------------------------------------------------------------------------------------------------------------------------------------------------------------------------------------------------------------|--------------------------------------------------------|
| Time post-procedure scores collected                                                                                                                                                                                                                                                                                                                                                                                                                                                                                                               | ___ / ___ / ___<br>dd mmm yyyy<br>:<br>(24 hour clock) |
| Pain Score: verbal Numerical Rating Scale (vNRS) - Procedure<br>"On a scale of 0 to 10, where 0 is no pain and 10 is the worst pain you can imagine, what was your pain level <u>during the needle / IV poke?</u> "                                                                                                                                                                                                                                                                                                                                | ___ / 10                                               |
| Distress Score: Numerical Rating Scale - Procedure<br>"On a scale of 0 to 10, where 0 is no distress and 10 is the most distress you can imagine having, what was your distress level <u>during the needle / IV poke?</u> "                                                                                                                                                                                                                                                                                                                        | ___ / 10                                               |
| Fear Score: Children's Fear Scale (CFS) - Procedure<br>"These faces are showing different amounts of being scared. This face [point to the left-most face] is not scared at all, this face is a little bit more scared [point to the second face from left], a bit more scared [sweep finger along scale], right up to the most scared possible [point to the last face on the right]. Have a look at these faces and choose the one that shows how scared you were <u>during the needle / IV poke.</u> "                                          |                                                        |
|                                                                                                                                                                                                                                                                                                                                                                                                                                                                                                                                                    |                                                        |
| Nausea Score: Baxter Retching Faces (BARF) Scale - Procedure<br>"Have you thrown up or felt like you were going to throw up before? How did your tummy feel then? We call that feeling of being sick to the stomach nausea. These faces show children who feel no nausea at all, who feel a little bit nauseated, who feel even more nauseated, and these are children who have the most nausea it is possible to feel." [Point to each face at the appropriate time.] "Which face is more like how you felt <u>during the needle / IV poke?</u> " |                                                        |


 A randomized controlled trial of virtual reality-based distraction for venipuncture-related distress in children:  
 The VR Study

| REB #: Pro00095418 | Screening ID | Enrolment Date               |
|--------------------|--------------|------------------------------|
| PI: Dr. Samina Ali | VR - _____   | ___/___/20___<br>dd mmm yyyy |

|                                                                                                                                                       |                                                                                                                                                                                    |
|-------------------------------------------------------------------------------------------------------------------------------------------------------|------------------------------------------------------------------------------------------------------------------------------------------------------------------------------------|
|                                                                                                                                                       |                                                                                                                                                                                    |
| <input type="checkbox"/> <input type="checkbox"/> <input type="checkbox"/> <input type="checkbox"/> <input type="checkbox"/> <input type="checkbox"/> |                                                                                                                                                                                    |
| Overall, how happy were you with the IV start today, on a scale of 1 to 5, where 1 means "Not at all happy" and 5 means "Very happy"?                 | <input type="checkbox"/> 1 "Not at all happy"<br><input type="checkbox"/> 2<br><input type="checkbox"/> 3<br><input type="checkbox"/> 4<br><input type="checkbox"/> 5 "Very happy" |
| On a scale of 1 to 5, where 1 means "Not at all happy" and 5 means "Very happy", how happy were you <u>with the pain treatment</u> for your IV start? | <input type="checkbox"/> 1 "Not at all happy"<br><input type="checkbox"/> 2<br><input type="checkbox"/> 3<br><input type="checkbox"/> 4<br><input type="checkbox"/> 5 "Very happy" |
| Did the [distraction / toys / VR goggles] help you today?                                                                                             | <input type="checkbox"/> Yes, it helped<br><input type="checkbox"/> No, it didn't help<br><input type="checkbox"/> I'm not sure                                                    |
| If you ever had to get an IV or needle poke again, would you want to use the same [distraction / toys / VR goggles] again?                            | <input type="checkbox"/> Yes, I would<br><input type="checkbox"/> No, I wouldn't<br><input type="checkbox"/> I'm not sure                                                          |
| Can you tell me why/ why not?                                                                                                                         |                                                                                                                                                                                    |

As soon as possible after completion of procedure, research assistant to give:

1. Post-Procedure Parent STAI and Satisfaction Questionnaire to parent/ caregiver
2. Nurse Satisfaction Questionnaire to staff ED nurse



**A randomized controlled trial of virtual reality-based distraction for venipuncture-related distress in children:  
The VR Study**

| REB #: Pro00095418 | Screening ID | Enrolment Date                  |
|--------------------|--------------|---------------------------------|
| PI: Dr. Samina Ali | VR - _____   | ____/____/20____<br>dd mmm yyyy |

## POST-Procedure: Parent / Caregiver STAI Questionnaire

We would ask that you complete the following questions as they relate to your feelings about your child's IV procedure that just happened. A number of statements which people have used to describe themselves are given below. Read each statement and then circle the appropriate number to indicate how you feel **right now**, that is, **at this moment**. There are no right or wrong answers. Do not spend too much time on any one statement but give the answer which seems to describe your feelings best.

|                                                           | 1-----     | 2-----   | 3-----        | 4-----       |
|-----------------------------------------------------------|------------|----------|---------------|--------------|
|                                                           | Not at all | Somewhat | Moderately so | Very much so |
| 1. I feel calm.....                                       | 1          | 2        | 3             | 4            |
| 2. I feel secure.....                                     | 1          | 2        | 3             | 4            |
| 3. I am tense.....                                        | 1          | 2        | 3             | 4            |
| 4. I feel strained.....                                   | 1          | 2        | 3             | 4            |
| 5. I feel at ease.....                                    | 1          | 2        | 3             | 4            |
| 6. I feel upset.....                                      | 1          | 2        | 3             | 4            |
| 7. I am presently worrying over possible misfortunes..... | 1          | 2        | 3             | 4            |
| 8. I feel satisfied.....                                  | 1          | 2        | 3             | 4            |
| 9. I feel frightened.....                                 | 1          | 2        | 3             | 4            |
| 10. I feel comfortable.....                               | 1          | 2        | 3             | 4            |
| 11. I feel self-confident.....                            | 1          | 2        | 3             | 4            |
| 12. I feel nervous.....                                   | 1          | 2        | 3             | 4            |
| 13. I am jittery.....                                     | 1          | 2        | 3             | 4            |
| 14. I feel indecisive.....                                | 1          | 2        | 3             | 4            |
| 15. I am relaxed.....                                     | 1          | 2        | 3             | 4            |
| 16. I feel content.....                                   | 1          | 2        | 3             | 4            |
| 17. I am worried.....                                     | 1          | 2        | 3             | 4            |
| 18. I feel confused.....                                  | 1          | 2        | 3             | 4            |
| 19. I feel steady.....                                    | 1          | 2        | 3             | 4            |
| 20. I feel pleasant.....                                  | 1          | 2        | 3             | 4            |





FACULTY OF MEDICINE & DENTISTRY  
DEPARTMENT OF PEDIATRICS

**A randomized controlled trial of virtual reality-based distraction for venipuncture-related distress in children:  
The VR Study**

| REB #: Pro00095418 | Screening ID            | Enrolment Date                      |
|--------------------|-------------------------|-------------------------------------|
| PI: Dr. Samina Ali | VR - ____ - ____ - ____ | ____ / ____ / 20____<br>dd mmm yyyy |

**POST-Procedure: Caregiver Satisfaction Questionnaire**

1) Please rate your overall satisfaction with your child’s IV start:

|                          |                          |                          |                          |                          |
|--------------------------|--------------------------|--------------------------|--------------------------|--------------------------|
| <i>Very Dissatisfied</i> | <i>Dissatisfied</i>      | <i>Neutral</i>           | <i>Satisfied</i>         | <i>Very Satisfied</i>    |
| <b>1</b>                 | <b>2</b>                 | <b>3</b>                 | <b>4</b>                 | <b>5</b>                 |
| <input type="checkbox"/> |

Please Explain: \_\_\_\_\_  
\_\_\_\_\_  
\_\_\_\_\_

2) Please rate your satisfaction with the **management of your child’s pain** for their IV start:

|                          |                          |                          |                          |                          |
|--------------------------|--------------------------|--------------------------|--------------------------|--------------------------|
| <i>Very Dissatisfied</i> | <i>Dissatisfied</i>      | <i>Neutral</i>           | <i>Satisfied</i>         | <i>Very Satisfied</i>    |
| <b>1</b>                 | <b>2</b>                 | <b>3</b>                 | <b>4</b>                 | <b>5</b>                 |
| <input type="checkbox"/> |

Please Explain: \_\_\_\_\_  
\_\_\_\_\_  
\_\_\_\_\_

3) Would you use the same methods to manage your child’s pain from needle pokes in the future?

Yes  
 No

Why / Why not? \_\_\_\_\_  
\_\_\_\_\_  
\_\_\_\_\_

**Thank you for your participation in our research study,  
it is very much appreciated!**



**A randomized controlled trial of virtual reality-based distraction for venipuncture-related distress in children:  
The VR Study**

| REB #: Pro00095418 | Screening ID      | Enrolment Date                  |
|--------------------|-------------------|---------------------------------|
| PI: Dr. Samina Ali | <b>VR -</b> _____ | ____/____/20____<br>dd mmm yyyy |

### Nurse Satisfaction Questionnaire (VR Group)

1) Overall, how easy or difficult was it to perform the IV insertion for this child?

|                          |                          |                          |                          |                          |
|--------------------------|--------------------------|--------------------------|--------------------------|--------------------------|
| <i>Very Easy</i>         | <i>Easy</i>              | <i>Neutral</i>           | <i>Difficult</i>         | <i>Very Difficult</i>    |
| <b>1</b>                 | <b>2</b>                 | <b>3</b>                 | <b>4</b>                 | <b>5</b>                 |
| <input type="checkbox"/> |

2) Please rate your satisfaction with this child's IV start:

|                          |                          |                          |                          |                          |
|--------------------------|--------------------------|--------------------------|--------------------------|--------------------------|
| <i>Very Dissatisfied</i> | <i>Dissatisfied</i>      | <i>Neutral</i>           | <i>Satisfied</i>         | <i>Very Satisfied</i>    |
| <b>1</b>                 | <b>2</b>                 | <b>3</b>                 | <b>4</b>                 | <b>5</b>                 |
| <input type="checkbox"/> |

3) Would you use the same methods (ie. VR device) to manage another child's pain and distress from IV insertion in the future?

Yes  
 No

4) Could you please rate the following on a scale of 1-5, where **1=Not at all** and **5=Very much**

|                                                                                                    | <b>1</b>                 | <b>2</b>                 | <b>3</b>                 | <b>4</b>                 | <b>5</b>                 |
|----------------------------------------------------------------------------------------------------|--------------------------|--------------------------|--------------------------|--------------------------|--------------------------|
| Your overall satisfaction with the Virtual Reality (VR) device today                               | <input type="checkbox"/> |
| Your willingness to use the VR device to manage another child's IV pain and distress in the future | <input type="checkbox"/> |
| The degree to which the VR device improved the child's experience                                  | <input type="checkbox"/> |
| The degree to which the VR <b>improved</b> your ability to insert the IV                           | <input type="checkbox"/> |
| The degree to which the VR <b>disrupted</b> your ability to insert the IV                          | <input type="checkbox"/> |

5) Did the VR device that was used during the procedure increase the time required to insert the IV?

Yes (approximately how much time did it increase the procedure by? \_\_\_\_\_ minutes)  
 No

6) Is there anything else that you would like to tell us, today, about your experience inserting an IV for a child using a VR device?



**A randomized controlled trial of virtual reality-based distraction for venipuncture-related distress in children:  
The VR Study**

| REB #: Pro00095418 | Screening ID | Enrolment Date                  |
|--------------------|--------------|---------------------------------|
| PI: Dr. Samina Ali | VR - _____   | ____/____/20____<br>dd mmm yyyy |

7) How many years of practice do you have as a nurse (all settings)? \_\_\_\_\_  N/A

8) How many years of practice do you have as a nurse in the ED? \_\_\_\_\_  N/A

9) Please indicate the amount of time spent in the pediatric emergency department (PED):

- 0-25% of my time is spent in the pediatric ED  
 26-50% of my time is spent in the pediatric ED  
 51-75% of my time is spent in the pediatric ED  
 76-100% of my time is spent in the pediatric ED

10) Please specify your position if other than attending ED nurse (e.g., IV nurse, attending ED physician, resident, physician or nurse from other service [specify], etc):

\_\_\_\_\_

**Thank You!!**



**A randomized controlled trial of virtual reality-based distraction for venipuncture-related distress in children:  
The VR Study**

| REB #: Pro00095418 | Screening ID | Enrolment Date               |
|--------------------|--------------|------------------------------|
| PI: Dr. Samina Ali | VR - _____   | ___/___/20___<br>dd mmm yyyy |

### Nurse Satisfaction Questionnaire (Standard Care Group)

1) Overall, how easy or difficult was it to perform the IV insertion for this child?

|                          |                          |                          |                          |                          |
|--------------------------|--------------------------|--------------------------|--------------------------|--------------------------|
| <i>Very Easy</i>         | <i>Easy</i>              | <i>Neutral</i>           | <i>Difficult</i>         | <i>Very Difficult</i>    |
| <b>1</b>                 | <b>2</b>                 | <b>3</b>                 | <b>4</b>                 | <b>5</b>                 |
| <input type="checkbox"/> |

2) Please rate your satisfaction with this child's IV start:

|                          |                          |                          |                          |                          |
|--------------------------|--------------------------|--------------------------|--------------------------|--------------------------|
| <i>Very Dissatisfied</i> | <i>Dissatisfied</i>      | <i>Neutral</i>           | <i>Satisfied</i>         | <i>Very Satisfied</i>    |
| <b>1</b>                 | <b>2</b>                 | <b>3</b>                 | <b>4</b>                 | <b>5</b>                 |
| <input type="checkbox"/> |

3) Would you use the same methods (ie. Standard of Care pain management plan) to manage another child's pain and distress from IV insertion in the future?

Yes  
 No

4) Could you please rate the following on a scale of 1-5, where 1= Not at all and 5=Very much

|                                                                                                                     | <b>1</b>                 | <b>2</b>                 | <b>3</b>                 | <b>4</b>                 | <b>5</b>                 |
|---------------------------------------------------------------------------------------------------------------------|--------------------------|--------------------------|--------------------------|--------------------------|--------------------------|
| Your overall satisfaction with the pain management plan today                                                       | <input type="checkbox"/> |
| Your willingness to use a similar pain management plan to manage another child's IV pain and distress in the future | <input type="checkbox"/> |
| The degree to which the pain management plan improved the child's experience                                        | <input type="checkbox"/> |
| The degree to which the pain management plan <b>improved</b> your ability to insert the IV                          | <input type="checkbox"/> |
| The degree to which the pain management plan <b>disrupted</b> your ability to insert the IV                         | <input type="checkbox"/> |

5) Did the Standard of Care pain management plan that was used during the procedure increase the time required to insert the IV?

Yes (approximately how much time did it increase the procedure by? \_\_\_\_\_ minutes)  
 No

6) Is there anything else that you would like to tell us, today, about your experience inserting an IV for a child using a Standard of Care pain management plan?



**A randomized controlled trial of virtual reality-based distraction for venipuncture-related distress in children:  
The VR Study**

| REB #: Pro00095418 | Screening ID | Enrolment Date                      |
|--------------------|--------------|-------------------------------------|
| PI: Dr. Samina Ali | VR - _____   | ____ / ____ / 20____<br>dd mmm yyyy |

- 7) How many years of practice do you have as a nurse (all settings)? \_\_\_\_\_  N/A
- 8) How many years of practice do you have as a nurse in the ED? \_\_\_\_\_  N/A
- 9) Please indicate the amount of time spent in the pediatric emergency department (PED):
- 0-25% of my time is spent in the pediatric ED
- 26-50% of my time is spent in the pediatric ED
- 51-75% of my time is spent in the pediatric ED
- 76-100% of my time is spent in the pediatric ED
- 10) Please specify your position if other than attending ED nurse (e.g., IV nurse, attending ED physician, resident, physician or nurse from other service [specify], etc):
- \_\_\_\_\_

**Thank You!!**

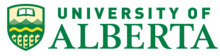

**A randomized controlled trial of virtual reality-based distraction for venipuncture-related distress in children:  
The VR Study**

| REB #: Pro00095418 | Screening ID                  | Enrolment Date                         |
|--------------------|-------------------------------|----------------------------------------|
| PI: Dr. Samina Ali | <b>VR -</b> ___    ___    ___ | ___ / ___ / 20___<br>dd    mmm    yyyy |

### Discharge Information

|                                          |                                                                                                                        |
|------------------------------------------|------------------------------------------------------------------------------------------------------------------------|
| Disposition                              | <input type="checkbox"/> Discharged Home<br><input type="checkbox"/> Admitted<br><input type="checkbox"/> Other, _____ |
| Date & Time of Discharge from the ED     | ___ / ___ / ___<br>dd    mmm    yyyy<br>: _____<br>(24 hour clock)                                                     |
| Length of Stay in ED (calculated field): | ___ hours                                                                                                              |
| Discharge Diagnosis                      |                                                                                                                        |



**A randomized controlled trial of virtual reality-based distraction for venipuncture-related distress in children:  
The VR Study**

| REB #: Pro00095418 | Screening ID | Enrolment Date               |
|--------------------|--------------|------------------------------|
| PI: Dr. Samina Ali | VR - _____   | ___/___/20___<br>dd mmm yyyy |

**RA Satisfaction Questionnaire** (For Standard Care group, answer Q6 ONLY)

1) Could you please rate the following on a scale of 1-5, where 1= Not at all and 5=Very much

|                                                                           | 1                        | 2                        | 3                        | 4                        | 5                        |
|---------------------------------------------------------------------------|--------------------------|--------------------------|--------------------------|--------------------------|--------------------------|
| Your overall satisfaction with the Virtual Reality (VR) device today      | <input type="checkbox"/> |
| Ease of set-up of the VR device                                           | <input type="checkbox"/> |
| Your satisfaction with the amount of time it took to set up the VR device | <input type="checkbox"/> |
| Your desire to work with the VR device again                              | <input type="checkbox"/> |

2) Approximately how much time was needed to set up the VR device with the child, today?  
(excluding consent and questionnaire time)

\_\_\_\_\_ minutes

3) What components of the VR device did the child use during the IV procedure? (check all that apply)

- VR Goggles / Headset  
 Controller  
 Headphones

4) Were the VR Goggles / Headset kept on for the entire duration of the procedure?

- Yes  
 No

5) What applications / game(s) did the child play during the procedure?

6) What pain management or distraction tools / resources were used during the procedure?  
(Check all that apply. If a CLS was involved, ask them to clarify which tools were used.)

- Virtual Reality  
 iPad / Tablet / Smartphone  
 Toys  
 Music  
 Child Life Specialist (CLS)  
 Other; specify: \_\_\_\_\_  
 No other techniques were used

7) Did you have any technical or other issues with operating / handing the VR equipment?

- Yes; specify: \_\_\_\_\_  
 No

8) Is there anything else that you would like to tell us about your experience with the VR goggles today?

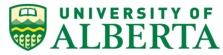
 A randomized controlled trial of virtual reality-based distraction for venipuncture-related distress in children:  
 The VR Study

|                    |                     |                                     |
|--------------------|---------------------|-------------------------------------|
| REB #: Pro00095418 | Screening ID        | Enrolment Date                      |
| PI: Dr. Samina Ali | VR - ____ ____ ____ | ____ / ____ / 20____<br>dd mmm yyyy |

## Adverse Events Log

| To be filled out by Research Assistant |                              |                                             |                                                                                                                                |                                                                                                                          |                                                | To be filled out by Site Investigator                   |                       |                                                                                                   |               |                 |
|----------------------------------------|------------------------------|---------------------------------------------|--------------------------------------------------------------------------------------------------------------------------------|--------------------------------------------------------------------------------------------------------------------------|------------------------------------------------|---------------------------------------------------------|-----------------------|---------------------------------------------------------------------------------------------------|---------------|-----------------|
| No.                                    | Description of Adverse Event | Onset Date & Time<br>(dd/mmm/yyyy<br>HH:MM) | Action Taken<br>1. None<br>2. Medication<br>3. New or Prolonged Hospitalization<br>4. Procedure / Surgery<br>5. Other, specify | Outcome<br>1. Resolved<br>2. Resolved with Sequelae<br>3. Resolving<br>4. Unresolved<br>5. Fatal<br>6. Lost to follow-up | Date & Time Resolved<br>(dd/mmm/yyyy<br>HH:MM) | Intensity grade:<br>1. Mild<br>2. Moderate<br>3. Severe | Expected AE?<br>Y / N | Relationship to Study<br>1. Unrelated<br>2. Unlikely<br>3. Possible<br>4. Probable<br>5. Definite | SAE?<br>Y / N | Site PI Initial |
| 1                                      |                              |                                             |                                                                                                                                |                                                                                                                          |                                                |                                                         |                       |                                                                                                   |               |                 |
| 2                                      |                              |                                             |                                                                                                                                |                                                                                                                          |                                                |                                                         |                       |                                                                                                   |               |                 |
| 3                                      |                              |                                             |                                                                                                                                |                                                                                                                          |                                                |                                                         |                       |                                                                                                   |               |                 |



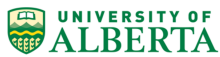

**A randomized controlled trial of virtual reality-based distraction for venipuncture-related distress in children:  
The VR Study**

| REB #: Pro00095418 | Screening ID                  | Enrolment Date                         |
|--------------------|-------------------------------|----------------------------------------|
| PI: Dr. Samina Ali | <b>VR -</b> ___    ___    ___ | ___ / ___ / 20___<br>dd    mmm    yyyy |

## Early Withdrawal

ONLY fill out this form in the event of an early withdrawal

|                                                                                                                               |                                                                                                                                                                                                                                                                            |
|-------------------------------------------------------------------------------------------------------------------------------|----------------------------------------------------------------------------------------------------------------------------------------------------------------------------------------------------------------------------------------------------------------------------|
| Date of Discontinuation:                                                                                                      | ___ / ___ / ___<br>dd    mmm    yyyy                                                                                                                                                                                                                                       |
| Reasons for Discontinuation:<br>(check all that apply)                                                                        | <input type="checkbox"/> Adverse Event / Serious Adverse Event<br><input type="checkbox"/> Death<br><input type="checkbox"/> Withdrawal of Consent / Assent<br><input type="checkbox"/> Protocol Violation, Specify _____<br><input type="checkbox"/> Other, Specify _____ |
| <b><u>If withdrew consent / assent:</u></b><br>1. Permission to use collected data?<br>2. Permission to conduct Chart Review? | <input type="checkbox"/> Yes <input type="checkbox"/> No<br><input type="checkbox"/> Yes <input type="checkbox"/> No                                                                                                                                                       |
| <u>Comments:</u>                                                                                                              |                                                                                                                                                                                                                                                                            |
